# Supplementary material for: The micro-niche explains allotopy and syntopy in South American Liolaemus (Iguania: Liolaemidae) lizards
Source: PeerJ. 2025 Feb 17;13:e18979. doi: 10.7717/peerj.18979 (PMC11841597; doi:10.7717/peerj.18979)
Supplement: Supplemental Information 5 [file peerj-13-18979-s005.xlsx]

## Sheet: Mod_microclim
Site 1
	DOY	TIME	TALOC	TAREF	RHLOC	RH	VLOC	VREF	SNOWMELT	POOLDEP	PCTWET	ZEN	SOLR	TSKYC	DEW	FROST	SNOWFALL	SNOWDEP	SNOWDENS
1	1	0	4.35172	4.36325	53.2214	53.1784	1.41398	1.46047	0	0	0	90	0	-8.59503	0	0	0	0	0.375
2	1	60	4.12135	4.14045	58.0711	57.9932	1.13914	1.17659	0	0	0	90	0	-8.55424	0	0	0	0	0.375
3	1	120	3.98442	4.00929	62.918	62.808	0.864296	0.892711	0	0	0	90	0	-8.42827	0	0	0	0	0.375
4	1	180	3.8786	3.91016	67.7732	67.6229	0.589453	0.608833	0	0	0	90	0	-8.28378	0	0	0	0	0.375
5	1	240	3.79303	3.83523	72.6533	72.4377	0.271227	0.280144	0	0	0	90	7.68341e-06	-8.12736	0	0	0	0	0.375
6	1	300	3.7317	3.7786	78.2708	78.0126	0.225223	0.232628	0	0	0	90	0.726097	-7.92875	0	0	0	0	0.375
7	1	360	4.0832	4.04731	77.816	78.0126	0.516662	0.533648	0	0	0	80.7439	95.5159	-7.60593	0	0	0	0	0.375
8	1	420	5.83458	5.65245	69.9637	70.8528	0.808101	0.834669	0	0	0	67.7915	259.432	-6.05944	0	0	0	0	0.375
9	1	480	8.49318	8.1803	61.0404	62.3511	1.09954	1.13569	0	0	0	54.5275	412.96	-3.5338	0	0	0	0	0.375
10	1	540	11.6352	11.2306	52.4252	53.8494	1.39098	1.43671	0	0	0	41.0566	556.133	-0.464439	0	0	0	0	0.375
11	1	600	14.7797	14.3203	44.0208	45.3476	1.68242	1.73773	0	0	0	27.4538	661.484	2.5502	0	0	0	0	0.375
12	1	660	17.4341	16.9602	27.5064	28.3441	1.97386	2.03875	0	0	0	13.7861	731.648	3.929	0	0	0	0	0.375
13	1	720	19.1681	18.7322	27.583	28.3441	2.55673	2.64079	0	0	0	1.20787	754.758	6.00198	0	0	0	0	0.375
14	1	780	19.7868	19.3558	29.6099	30.4137	2.55673	2.64079	0	0	0	13.7861	731.282	6.99346	0	0	0	0	0.375
15	1	840	19.1524	18.7322	31.6418	32.4832	2.45285	2.53349	0	0	0	27.4538	663.547	6.50619	0	0	0	0	0.375
16	1	900	17.3491	16.9602	33.7121	34.5527	2.34896	2.42619	0	0	0	41.0566	558.74	4.65313	0	0	0	0	0.375
17	1	960	14.6497	14.3203	35.8504	36.6222	2.24507	2.31888	0	0	0	54.5275	415.547	1.76584	0	0	0	0	0.375
18	1	1020	11.4782	11.2306	38.0618	38.6917	2.14119	2.21158	0	0	0	67.7915	261.467	-1.66056	0	0	0	0	0.375
19	1	1080	8.32408	8.18029	40.3649	40.7613	2.0373	2.10428	0	0	0	80.7439	96.417	-5.04895	0	0	0	0	0.375
20	1	1140	6.54862	6.49371	42.669	42.8308	1.93341	1.99698	0	0	0	90	0.73234	-6.84984	0	0	0	0	0.375
21	1	1200	5.82149	5.80316	44.8433	44.9003	1.82953	1.88968	0	0	0	90	7.73504e-06	-7.49451	0	0	0	0	0.375
22	1	1260	5.28759	5.28123	46.949	46.9698	1.72564	1.78237	0	0	0	90	0	-7.94962	0	0	0	0	0.375
23	1	1320	4.88796	4.88675	49.0352	49.0393	1.62175	1.67507	0	0	0	90	0	-8.26243	0	0	0	0	0.375
24	1	1380	4.57927	4.5886	51.1422	51.1088	1.51787	1.56777	0	0	0	90	0	-8.4686	0	0	0	0	0.375
25	2	0	4.3559	4.36325	53.2058	53.1784	1.41398	1.46047	0	0	0	90	0	-8.59503	0	0	0	0	0.375
26	2	60	4.21285	4.22807	58.0595	57.9975	1.14014	1.17763	0	0	0	90	0	-8.45086	0	0	0	0	0.375
27	2	120	4.07296	4.09288	62.9046	62.8166	0.866306	0.894787	0	0	0	90	0	-8.32909	0	0	0	0	0.375
28	2	180	3.93239	3.9577	67.7563	67.6357	0.592469	0.611947	0	0	0	90	0	-8.22662	0	0	0	0	0.375
29	2	240	3.78887	3.82252	72.6268	72.4548	0.270351	0.279239	0	0	0	90	7.33708e-06	-8.14099	0	0	0	0	0.375
30	2	300	3.65117	3.68734	78.5868	78.3866	0.223968	0.231331	0	0	0	90	0.695652	-7.94234	0	0	0	0	0.375
31	2	360	4.14692	4.10542	78.1584	78.3866	0.514531	0.531447	0	0	0	80.7754	94.6511	-7.44378	0	0	0	0	0.375
32	2	420	5.88567	5.69963	70.3184	71.231	0.805095	0.831563	0	0	0	67.8168	257.788	-5.9084	0	0	0	0	0.375
33	2	480	8.52719	8.21185	61.3879	62.7162	1.09566	1.13168	0	0	0	54.5476	410.63	-3.40022	0	0	0	0	0.375
34	2	540	11.6502	11.2441	52.7628	54.2014	1.38622	1.43179	0	0	0	41.0724	553.172	-0.350828	0	0	0	0	0.375
35	2	600	14.7764	14.316	44.347	45.6865	1.67678	1.73191	0	0	0	27.4662	658.073	2.64627	0	0	0	0	0.375
36	2	660	17.4155	16.9409	27.8086	28.6569	1.96735	2.03203	0	0	0	13.7978	727.965	4.03357	0	0	0	0	0.375
37	2	720	19.1396	18.703	27.8859	28.6569	2.54847	2.63226	0	0	0	1.29	750.975	6.09144	0	0	0	0	0.375
38	2	780	19.7547	19.3231	29.9154	30.7289	2.54847	2.63226	0	0	0	13.7978	727.597	7.07232	0	0	0	0	0.375
39	2	840	19.1239	18.703	31.9497	32.801	2.44492	2.5253	0	0	0	27.4662	660.154	6.58559	0	0	0	0	0.375
40	2	900	17.3307	16.9409	34.0226	34.8731	2.34137	2.41835	0	0	0	41.0724	555.801	4.7435	0	0	0	0	0.375
41	2	960	14.6466	14.316	36.1636	36.9452	2.23782	2.31139	0	0	0	54.5476	413.238	1.87531	0	0	0	0	0.375
42	2	1020	11.4933	11.2441	38.3781	39.0172	2.13427	2.20444	0	0	0	67.8168	259.839	-1.52739	0	0	0	0	0.375
43	2	1080	8.35766	8.21184	40.6843	41.0893	2.03072	2.09748	0	0	0	80.7754	95.5566	-4.89162	0	0	0	0	0.375
44	2	1140	6.59576	6.53842	42.9913	43.1614	1.92717	1.99053	0	0	0	90	0.701714	-6.6766	0	0	0	0	0.375
45	2	1200	5.87285	5.85196	45.1681	45.2335	1.82362	1.88357	0	0	0	90	7.3496e-06	-7.31778	0	0	0	0	0.375
46	2	1260	5.34205	5.33308	47.276	47.3055	1.72007	1.77661	0	0	0	90	0	-7.7708	0	0	0	0	0.375
47	2	1320	4.94463	4.94086	49.3646	49.3776	1.61651	1.66966	0	0	0	90	0	-8.08253	0	0	0	0	0.375
48	2	1380	4.63795	4.64439	51.4729	51.4497	1.51296	1.5627	0	0	0	90	0	-8.28836	0	0	0	0	0.375
49	3	0	4.41552	4.4203	53.5397	53.5217	1.40941	1.45575	0	0	0	90	0	-8.415	0	0	0	0	0.375
50	3	60	4.2737	4.28586	58.3947	58.3449	1.13659	1.17396	0	0	0	90	0	-8.2744	0	0	0	0	0.375
51	3	120	4.13498	4.15143	63.241	63.168	0.86377	0.892167	0	0	0	90	0	-8.15573	0	0	0	0	0.375
52	3	180	3.99575	4.017	68.0928	67.9911	0.590948	0.610376	0	0	0	90	0	-8.05599	0	0	0	0	0.375
53	3	240	3.85404	3.88257	72.9606	72.8142	0.269474	0.278333	0	0	0	90	6.94125e-06	-7.97275	0	0	0	0	0.375
54	3	300	3.71742	3.74813	78.9266	78.7559	0.222667	0.229988	0	0	0	90	0.664173	-7.77788	0	0	0	0	0.375
55	3	360	4.207	4.16165	78.5055	78.7559	0.51236	0.529204	0	0	0	80.8098	93.7596	-7.2856	0	0	0	0	0.375
56	3	420	5.93293	5.74496	70.6794	71.6059	0.802052	0.828421	0	0	0	67.8446	256.128	-5.76126	0	0	0	0	0.375
57	3	480	8.55779	8.2417	61.7392	63.0779	1.09174	1.12764	0	0	0	54.5697	408.297	-3.27038	0	0	0	0	0.375
58	3	540	11.6623	11.2562	53.1021	54.55	1.38144	1.42685	0	0	0	41.0898	550.219	-0.240673	0	0	0	0	0.375
59	3	600	14.7706	14.3105	44.6735	46.022	1.67113	1.72607	0	0	0	27.48	654.679	2.73913	0	0	0	0	0.375
60	3	660	17.3949	16.9207	28.1092	28.9662	1.96082	2.02529	0	0	0	13.8111	724.306	4.13452	0	0	0	0	0.375
61	3	720	19.1094	18.673	28.1871	28.9662	2.54021	2.62372	0	0	0	1.37976	747.217	6.17756	0	0	0	0	0.375
62	3	780	19.7212	19.2897	30.2191	31.0407	2.54021	2.62372	0	0	0	13.8111	723.935	7.14809	0	0	0	0	0.375
63	3	840	19.0939	18.673	32.2558	33.1153	2.43699	2.51711	0	0	0	27.48	656.778	6.66194	0	0	0	0	0.375
64	3	900	17.3107	16.9207	34.3313	35.1899	2.33378	2.4105	0	0	0	41.0898	552.871	4.83065	0	0	0	0	0.375
65	3	960	14.6416	14.3105	36.475	37.2645	2.23056	2.30389	0	0	0	54.5697	410.926	1.98123	0	0	0	0	0.375
66	3	1020	11.5062	11.2561	38.6925	39.339	2.12735	2.19728	0	0	0	67.8446	258.193	-1.39815	0	0	0	0	0.375
67	3	1080	8.38879	8.2417	41.0019	41.4136	2.02413	2.09068	0	0	0	80.8098	94.6689	-4.73855	0	0	0	0	0.375
68	3	1140	6.64059	6.58155	43.3117	43.4882	1.92092	1.98407	0	0	0	90	0.670038	-6.50751	0	0	0	0	0.375
69	3	1200	5.92182	5.89911	45.4912	45.5627	1.8177	1.87746	0	0	0	90	6.95387e-06	-7.14525	0	0	0	0	0.375
70	3	1260	5.39407	5.38322	47.6014	47.6373	1.71449	1.77085	0	0	0	90	0	-7.59619	0	0	0	0	0.375
71	3	1320	4.99882	4.99323	49.6925	49.7119	1.61127	1.66424	0	0	0	90	0	-7.90686	0	0	0	0	0.375
72	3	1380	4.69411	4.69841	51.8021	51.7865	1.50805	1.55763	0	0	0	90	0	-8.11236	0	0	0	0	0.375
73	4	0	4.47259	4.47554	53.8722	53.861	1.40484	1.45103	0	0	0	90	0	-8.2392	0	0	0	0	0.375
74	4	60	4.33191	4.34184	58.7287	58.6879	1.13304	1.17029	0	0	0	90	0	-8.10211	0	0	0	0	0.375
75	4	120	4.19424	4.20814	63.5767	63.5147	0.861243	0.889557	0	0	0	90	0	-7.9865	0	0	0	0	0.375
76	4	180	4.05618	4.07444	68.4293	68.3415	0.589444	0.608823	0	0	0	90	0	-7.88945	0	0	0	0	0.375
77	4	240	3.916	3.94074	73.2958	73.1683	0.268599	0.27743	0	0	0	90	6.53924e-06	-7.80858	0	0	0	0	0.375
78	4	300	3.78036	3.80704	79.2682	79.1193	0.221325	0.228601	0	0	0	90	0.631945	-7.61769	0	0	0	0	0.375
79	4	360	4.26384	4.21589	78.8535	79.1193	0.510154	0.526926	0	0	0	80.8471	92.8433	-7.13175	0	0	0	0	0.375
80	4	420	5.97725	5.78834	71.0407	71.9763	0.798984	0.825252	0	0	0	67.8748	254.456	-5.61838	0	0	0	0	0.375
81	4	480	8.58585	8.2698	62.0894	63.4352	1.08781	1.12358	0	0	0	54.5939	405.967	-3.14456	0	0	0	0	0.375
82	4	540	11.6723	11.2668	53.4394	54.8942	1.37664	1.4219	0	0	0	41.1088	547.284	-0.134217	0	0	0	0	0.375
83	4	600	14.7632	14.304	44.9973	46.3532	1.66547	1.72023	0	0	0	27.4953	651.313	2.8286	0	0	0	0	0.375
84	4	660	17.3731	16.8998	28.4066	29.2711	1.9543	2.01855	0	0	0	13.8262	720.681	4.23167	0	0	0	0	0.375
85	4	720	19.0783	18.6425	28.4847	29.2711	2.53196	2.6152	0	0	0	1.4771	743.494	6.26019	0	0	0	0	0.375
86	4	780	19.6867	19.2559	30.5192	31.3481	2.53196	2.6152	0	0	0	13.8262	720.306	7.22065	0	0	0	0	0.375
87	4	840	19.063	18.6425	32.5583	33.4251	2.42908	2.50894	0	0	0	27.4953	653.429	6.7351	0	0	0	0	0.375
88	4	900	17.2895	16.8998	34.6363	35.5021	2.3262	2.40268	0	0	0	41.1088	549.956	4.9144	0	0	0	0	0.375
89	4	960	14.6352	14.304	36.7828	37.5791	2.22332	2.29642	0	0	0	54.5939	408.616	2.08338	0	0	0	0	0.375
90	4	1020	11.5173	11.2668	39.0032	39.6562	2.12044	2.19015	0	0	0	67.8748	256.536	-1.27312	0	0	0	0	0.375
91	4	1080	8.41782	8.2698	41.3158	41.7332	2.01756	2.08389	0	0	0	80.8471	93.7561	-4.5901	0	0	0	0	0.375
92	4	1140	6.68338	6.62299	43.6285	43.8102	1.91468	1.97763	0	0	0	90	0.637599	-6.34298	0	0	0	0	0.375
93	4	1200	5.9687	5.94451	45.8104	45.8872	1.8118	1.87137	0	0	0	90	6.55197e-06	-6.97732	0	0	0	0	0.375
94	4	1260	5.44393	5.43156	47.9229	47.9642	1.70892	1.7651	0	0	0	90	0	-7.42622	0	0	0	0	0.375
95	4	1320	5.0508	5.04374	50.0166	50.0412	1.60604	1.65884	0	0	0	90	0	-7.73584	0	0	0	0	0.375
96	4	1380	4.74799	4.75053	52.1275	52.1182	1.50316	1.55258	0	0	0	90	0	-7.94102	0	0	0	0	0.375
97	5	0	4.52737	4.52885	54.2008	54.1952	1.40028	1.44632	0	0	0	90	0	-8.06805	0	0	0	0	0.375
98	5	60	4.38777	4.39587	59.0589	59.0254	1.12951	1.16664	0	0	0	90	0	-7.93442	0	0	0	0	0.375
99	5	120	4.25108	4.26288	63.9085	63.8556	0.858736	0.886968	0	0	0	90	0	-7.82182	0	0	0	0	0.375
100	5	180	4.1141	4.1299	68.7621	68.6858	0.587963	0.607294	0	0	0	90	0	-7.72741	0	0	0	0	0.375
101	5	240	3.97529	3.99692	73.6279	73.516	0.267731	0.276533	0	0	0	90	6.13499e-06	-7.64887	0	0	0	0	0.375
102	5	300	3.84055	3.86393	79.6067	79.4758	0.219944	0.227175	0	0	0	90	0.599245	-7.46213	0	0	0	0	0.375
103	5	360	4.31793	4.26801	79.1979	79.4758	0.507922	0.524621	0	0	0	80.8874	91.9046	-6.98262	0	0	0	0	0.375
104	5	420	6.01902	5.82968	71.399	72.3411	0.795901	0.822067	0	0	0	67.9073	252.776	-5.4801	0	0	0	0	0.375
105	5	480	8.6117	8.29611	62.4359	63.7871	1.08388	1.11951	0	0	0	54.6199	403.646	-3.02307	0	0	0	0	0.375
106	5	540	11.6806	11.2759	53.7726	55.233	1.37186	1.41696	0	0	0	41.1295	544.373	-0.0316982	0	0	0	0	0.375
107	5	600	14.7543	14.2964	45.3173	46.6789	1.65984	1.71441	0	0	0	27.5121	647.506	2.91449	0	0	0	0	0.375
108	5	660	17.3501	16.8781	28.6998	29.5708	1.94782	2.01185	0	0	0	13.8432	717.099	4.32482	0	0	0	0	0.375
109	5	720	19.0465	18.6116	28.7778	29.5708	2.52377	2.60675	0	0	0	1.58198	739.819	6.3392	0	0	0	0	0.375
110	5	780	19.6517	19.2217	30.8145	31.6502	2.52377	2.60675	0	0	0	13.8432	716.722	7.28988	0	0	0	0	0.375
111	5	840	19.0311	18.6116	32.8564	33.7295	2.42123	2.50083	0	0	0	27.5121	649.638	6.80495	0	0	0	0	0.375
112	5	900	17.2673	16.8781	34.9365	35.8089	2.31868	2.39491	0	0	0	41.1295	547.067	4.9946	0	0	0	0	0.375
113	5	960	14.6275	14.2964	37.0856	37.8883	2.21613	2.28899	0	0	0	54.6199	406.315	2.18155	0	0	0	0	0.375
114	5	1020	11.5268	11.2759	39.3089	39.9677	2.11358	2.18307	0	0	0	67.9073	254.87	-1.15258	0	0	0	0	0.375
115	5	1080	8.44483	8.29611	41.6247	42.047	2.01104	2.07715	0	0	0	80.8874	92.8202	-4.44662	0	0	0	0	0.375
116	5	1140	6.72421	6.66269	43.94	44.1264	1.90849	1.97123	0	0	0	90	0.604675	-6.18339	0	0	0	0	0.375
117	5	1200	6.01354	5.98807	46.1244	46.2058	1.80594	1.86531	0	0	0	90	6.14781e-06	-6.8144	0	0	0	0	0.375
118	5	1260	5.49168	5.47798	48.2392	48.2852	1.70339	1.7594	0	0	0	90	0	-7.2613	0	0	0	0	0.375
119	5	1320	5.10061	5.09228	50.3353	50.3645	1.60085	1.65348	0	0	0	90	0	-7.5699	0	0	0	0	0.375
120	5	1380	4.79964	4.80064	52.4476	52.4439	1.4983	1.54756	0	0	0	90	0	-7.77476	0	0	0	0	0.375
121	6	0	4.5799	4.58012	54.5241	54.5233	1.39575	1.44164	0	0	0	90	0	-7.90199	0	0	0	0	0.375
122	6	60	4.44132	4.44783	59.3836	59.3565	1.12601	1.16302	0	0	0	90	0	-7.77173	0	0	0	0	0.375
123	6	120	4.30555	4.31554	64.2348	64.1897	0.856259	0.88441	0	0	0	90	0	-7.66208	0	0	0	0	0.375
124	6	180	4.16958	4.18325	69.0893	69.023	0.586512	0.605795	0	0	0	90	0	-7.57026	0	0	0	0	0.375
125	6	240	4.03203	4.05096	73.9545	73.8562	0.266871	0.275645	0	0	0	90	5.7322e-06	-7.49402	0	0	0	0	0.375
126	6	300	3.89815	3.91867	79.9394	79.824	0.218528	0.225712	0	0	0	90	0.566336	-7.3116	0	0	0	0	0.375
127	6	360	4.36939	4.31791	79.5363	79.824	0.505671	0.522296	0	0	0	80.9305	90.9454	-6.83856	0	0	0	0	0.375
128	6	420	6.05834	5.86891	71.7524	72.6994	0.792814	0.818879	0	0	0	67.9423	251.094	-5.34674	0	0	0	0	0.375
129	6	480	8.63547	8.32058	62.7771	64.1324	1.07996	1.11546	0	0	0	54.648	401.341	-2.90618	0	0	0	0	0.375
130	6	540	11.6872	11.2837	54.1002	55.5653	1.3671	1.41205	0	0	0	41.1519	541.496	0.0666535	0	0	0	0	0.375
131	6	600	14.7444	14.2878	45.6312	46.9983	1.65424	1.70863	0	0	0	27.5304	644.226	2.99663	0	0	0	0	0.375
132	6	660	17.3266	16.8559	28.9868	29.8643	1.94139	2.00521	0	0	0	13.8622	713.573	4.41382	0	0	0	0	0.375
133	6	720	19.0142	18.5803	29.0649	29.8643	2.51567	2.59838	0	0	0	1.69434	736.202	6.41446	0	0	0	0	0.375
134	6	780	19.6164	19.1872	31.1039	31.946	2.51567	2.59838	0	0	0	13.8622	713.193	7.35568	0	0	0	0	0.375
135	6	840	18.9991	18.5803	33.1481	34.0276	2.41345	2.4928	0	0	0	27.5304	646.374	6.87138	0	0	0	0	0.375
136	6	900	17.2446	16.8559	35.2306	36.1093	2.31124	2.38722	0	0	0	41.1519	544.211	5.07111	0	0	0	0	0.375
137	6	960	14.6186	14.2878	37.3823	38.1909	2.20902	2.28164	0	0	0	54.648	404.03	2.27554	0	0	0	0	0.375
138	6	1020	11.5346	11.2837	39.6085	40.2726	2.1068	2.17606	0	0	0	67.9423	253.201	-1.0368	0	0	0	0	0.375
139	6	1080	8.46986	8.32058	41.9273	42.3542	2.00458	2.07048	0	0	0	80.9305	91.8635	-4.30845	0	0	0	0	0.375
140	6	1140	6.76307	6.70054	44.2452	44.4359	1.90236	1.96491	0	0	0	90	0.571533	-6.02912	0	0	0	0	0.375
141	6	1200	6.0563	6.02969	46.432	46.5175	1.80014	1.85933	0	0	0	90	5.74508e-06	-6.65688	0	0	0	0	0.375
142	6	1260	5.53727	5.52239	48.549	48.5992	1.69793	1.75375	0	0	0	90	0	-7.10183	0	0	0	0	0.375
143	6	1320	5.14821	5.13875	50.6475	50.6809	1.59571	1.64817	0	0	0	90	0	-7.40943	0	0	0	0	0.375
144	6	1380	4.84901	4.84863	52.7611	52.7625	1.49349	1.54259	0	0	0	90	0	-7.61399	0	0	0	0	0.375
145	7	0	4.63014	4.62923	54.8407	54.8442	1.39127	1.43701	0	0	0	90	0	-7.74142	0	0	0	0	0.375
146	7	60	4.49251	4.49761	59.7014	59.6801	1.12255	1.15945	0	0	0	90	0	-7.61445	0	0	0	0	0.375
147	7	120	4.35762	4.36599	64.5539	64.516	0.853823	0.881893	0	0	0	90	0	-7.50768	0	0	0	0	0.375
148	7	180	4.2226	4.23437	69.4092	69.3519	0.585098	0.604334	0	0	0	90	0	-7.41839	0	0	0	0	0.375
149	7	240	4.08623	4.10275	74.274	74.1878	0.266024	0.27477	0	0	0	90	5.33424e-06	-7.34439	0	0	0	0	0.375
150	7	300	3.95315	3.97113	80.2646	80.1631	0.217081	0.224218	0	0	0	90	0.533468	-7.16646	0	0	0	0	0.375
151	7	360	4.41823	4.36545	79.8671	80.1631	0.503407	0.519958	0	0	0	80.9765	89.9679	-6.69993	0	0	0	0	0.375
152	7	420	6.09524	5.90591	72.0991	73.0499	0.789733	0.815697	0	0	0	67.9797	249.412	-5.21864	0	0	0	0	0.375
153	7	480	8.65719	8.34316	63.1116	64.47	1.07606	1.11144	0	0	0	54.6782	399.058	-2.79418	0	0	0	0	0.375
154	7	540	11.6923	11.29	54.4211	55.8902	1.36239	1.40718	0	0	0	41.1761	538.661	0.160614	0	0	0	0	0.375
155	7	600	14.7334	14.2782	45.9382	47.3104	1.64871	1.70292	0	0	0	27.5505	641.002	3.07484	0	0	0	0	0.375
156	7	660	17.3025	16.8331	29.267	30.1507	1.93504	1.99865	0	0	0	13.8834	710.113	4.4985	0	0	0	0	0.375
157	7	720	18.9817	18.5488	29.3453	30.1507	2.50769	2.59013	0	0	0	1.81413	732.654	6.48584	0	0	0	0	0.375
158	7	780	19.5809	19.1527	31.3865	32.2346	2.50769	2.59013	0	0	0	13.8834	709.73	7.41795	0	0	0	0	0.375
159	7	840	18.9668	18.5488	33.4329	34.3184	2.4058	2.48489	0	0	0	27.5505	643.167	6.93428	0	0	0	0	0.375
160	7	900	17.2212	16.8331	35.5177	36.4023	2.3039	2.37965	0	0	0	41.1761	541.396	5.14377	0	0	0	0	0.375
161	7	960	14.6088	14.2782	37.6719	38.4861	2.20201	2.2744	0	0	0	54.6782	401.766	2.36515	0	0	0	0	0.375
162	7	1020	11.541	11.29	39.9008	40.57	2.10011	2.16916	0	0	0	67.9797	251.533	-0.926048	0	0	0	0	0.375
163	7	1080	8.49289	8.34316	42.2226	42.6538	1.99822	2.06391	0	0	0	80.9765	90.8879	-4.1759	0	0	0	0	0.375
164	7	1140	6.7999	6.73647	44.543	44.7377	1.89633	1.95867	0	0	0	90	0.538424	-5.88056	0	0	0	0	0.375
165	7	1200	6.09693	6.06928	46.7321	46.8215	1.79443	1.85343	0	0	0	90	5.34717e-06	-6.50514	0	0	0	0	0.375
166	7	1260	5.58064	5.56468	48.8512	48.9054	1.69254	1.74818	0	0	0	90	0	-6.9482	0	0	0	0	0.375
167	7	1320	5.19352	5.18303	50.952	50.9892	1.59064	1.64294	0	0	0	90	0	-7.25484	0	0	0	0	0.375
168	7	1380	4.89602	4.89437	53.067	53.0731	1.48875	1.5377	0	0	0	90	0	-7.45911	0	0	0	0	0.375
169	8	0	4.67798	4.67606	55.1495	55.1569	1.38686	1.43245	0	0	0	90	0	-7.58674	0	0	0	0	0.375
170	8	60	4.54127	4.54508	60.0112	59.9951	1.11915	1.15594	0	0	0	90	0	-7.46297	0	0	0	0	0.375
171	8	120	4.40721	4.41411	64.8647	64.8334	0.851437	0.879429	0	0	0	90	0	-7.359	0	0	0	0	0.375
172	8	180	4.27309	4.28313	69.7207	69.6716	0.583726	0.602917	0	0	0	90	0	-7.27219	0	0	0	0	0.375
173	8	240	4.13783	4.15216	74.5849	74.5098	0.265193	0.273912	0	0	0	90	4.94418e-06	-7.20038	0	0	0	0	0.375
174	8	300	4.00551	4.02118	80.5806	80.4918	0.215608	0.222696	0	0	0	90	0.500873	-7.02708	0	0	0	0	0.375
175	8	360	4.46438	4.41053	80.1887	80.4918	0.501139	0.517614	0	0	0	81.0255	88.9742	-6.56707	0	0	0	0	0.375
176	8	420	6.12968	5.94061	72.438	73.3915	0.78667	0.812533	0	0	0	68.0195	247.736	-5.09612	0	0	0	0	0.375
177	8	480	8.67686	8.3638	63.4381	64.7991	1.0722	1.10745	0	0	0	54.7103	396.805	-2.68734	0	0	0	0	0.375
178	8	540	11.6958	11.2948	54.734	56.2066	1.35773	1.40237	0	0	0	41.2021	535.877	0.249964	0	0	0	0	0.375
179	8	600	14.7215	14.2678	46.2374	47.6141	1.64326	1.69729	0	0	0	27.5723	637.845	3.14895	0	0	0	0	0.375
180	8	660	17.278	16.8099	29.5397	30.4291	1.92879	1.99221	0	0	0	13.9071	706.729	4.5787	0	0	0	0	0.375
181	8	720	18.9491	18.5172	29.618	30.4291	2.49986	2.58204	0	0	0	1.94128	729.186	6.55324	0	0	0	0	0.375
182	8	780	19.5454	19.1181	31.6614	32.515	2.49986	2.58204	0	0	0	13.9071	706.343	7.4766	0	0	0	0	0.375
183	8	840	18.9343	18.5172	33.7098	34.601	2.39828	2.47713	0	0	0	27.5723	640.026	6.99355	0	0	0	0	0.375
184	8	900	17.1973	16.8099	35.7968	36.6869	2.29671	2.37221	0	0	0	41.2021	538.632	5.21246	0	0	0	0	0.375
185	8	960	14.598	14.2678	37.9534	38.7729	2.19513	2.2673	0	0	0	54.7103	399.531	2.4502	0	0	0	0	0.375
186	8	1020	11.5458	11.2948	40.1851	40.8588	2.09355	2.16238	0	0	0	68.0195	249.869	-0.820572	0	0	0	0	0.375
187	8	1080	8.51389	8.3638	42.5097	42.9448	1.99198	2.05747	0	0	0	81.0255	89.8954	-4.04932	0	0	0	0	0.375
188	8	1140	6.83488	6.7704	44.8316	45.0307	1.8904	1.95255	0	0	0	90	0.505582	-5.73805	0	0	0	0	0.375
189	8	1200	6.13546	6.10675	47.0233	47.1167	1.78883	1.84764	0	0	0	90	4.9571e-06	-6.35957	0	0	0	0	0.375
190	8	1260	5.6217	5.60474	49.1448	49.2026	1.68725	1.74272	0	0	0	90	0	-6.8008	0	0	0	0	0.375
191	8	1320	5.23668	5.22501	51.2469	51.2886	1.58568	1.63781	0	0	0	90	0	-7.10651	0	0	0	0	0.375
192	8	1380	4.94026	4.93777	53.3652	53.3745	1.4841	1.53289	0	0	0	90	0	-7.31051	0	0	0	0	0.375
193	9	0	4.72373	4.72048	55.4479	55.4605	1.38253	1.42798	0	0	0	90	0	-7.43833	0	0	0	0	0.375
194	9	60	4.58752	4.59013	60.3116	60.3006	1.11582	1.1525	0	0	0	90	0	-7.31767	0	0	0	0	0.375
195	9	120	4.45421	4.45977	65.1662	65.1408	0.849111	0.877027	0	0	0	90	0	-7.21643	0	0	0	0	0.375
196	9	180	4.32094	4.32941	70.0226	69.981	0.582404	0.601552	0	0	0	90	0	-7.13202	0	0	0	0	0.375
197	9	240	4.18671	4.19905	74.886	74.8211	0.264382	0.273074	0	0	0	90	4.56471e-06	-7.06235	0	0	0	0	0.375
198	9	300	4.05513	4.06869	80.8862	80.8091	0.21411	0.221149	0	0	0	90	0.468764	-6.89381	0	0	0	0	0.375
199	9	360	4.50777	4.45302	80.4998	80.8091	0.498872	0.515273	0	0	0	81.0772	87.9662	-6.44034	0	0	0	0	0.375
200	9	420	6.16157	5.97292	72.7677	73.7233	0.783634	0.809397	0	0	0	68.0616	246.07	-4.97949	0	0	0	0	0.375
201	9	480	8.69444	8.38245	63.7555	65.1184	1.0684	1.10352	0	0	0	54.7445	394.586	-2.58593	0	0	0	0	0.375
202	9	540	11.6978	11.2983	55.0379	56.5134	1.35316	1.39765	0	0	0	41.2299	533.151	0.334491	0	0	0	0	0.375
203	9	600	14.7087	14.2565	46.5276	47.9084	1.63792	1.69177	0	0	0	27.5959	634.764	3.21881	0	0	0	0	0.375
204	9	660	17.2531	16.7864	29.8037	30.6985	1.92268	1.98589	0	0	0	13.9332	703.432	4.65428	0	0	0	0	0.375
205	9	720	18.9165	18.4857	29.8821	30.6985	2.49221	2.57414	0	0	0	2.07574	725.808	6.61654	0	0	0	0	0.375
206	9	780	19.5101	19.0838	31.9275	32.7865	2.49221	2.57414	0	0	0	13.9332	703.043	7.53153	0	0	0	0	0.375
207	9	840	18.9019	18.4857	33.9779	34.8744	2.39094	2.46955	0	0	0	27.5959	636.961	7.0491	0	0	0	0	0.375
208	9	900	17.1731	16.7864	36.0671	36.9624	2.28968	2.36495	0	0	0	41.2299	535.926	5.27705	0	0	0	0	0.375
209	9	960	14.5863	14.2565	38.2259	39.0503	2.18841	2.26036	0	0	0	54.7445	397.331	2.53049	0	0	0	0	0.375
210	9	1020	11.5491	11.2983	40.4602	41.1383	2.08715	2.15577	0	0	0	68.0616	248.215	-0.720625	0	0	0	0	0.375
211	9	1080	8.53282	8.38245	42.7875	43.2262	1.98588	2.05117	0	0	0	81.0772	88.8881	-3.929	0	0	0	0	0.375
212	9	1140	6.86746	6.80224	45.1115	45.3141	1.88462	1.94658	0	0	0	90	0.473221	-5.60197	0	0	0	0	0.375
213	9	1200	6.17159	6.14199	47.3052	47.4021	1.78335	1.84198	0	0	0	90	4.57758e-06	-6.22053	0	0	0	0	0.375
214	9	1260	5.66036	5.64249	49.4287	49.49	1.68209	1.73739	0	0	0	90	0	-6.66	0	0	0	0	0.375
215	9	1320	5.27712	5.26459	51.533	51.578	1.58082	1.6328	0	0	0	90	0	-6.96482	0	0	0	0	0.375
216	9	1380	4.98228	4.97869	53.6525	53.6659	1.47956	1.5282	0	0	0	90	0	-7.16857	0	0	0	0	0.375
217	10	0	4.76648	4.76239	55.7379	55.7538	1.37829	1.42361	0	0	0	90	0	-7.2966	0	0	0	0	0.375
218	10	60	4.63111	4.63262	60.6019	60.5955	1.11258	1.14915	0	0	0	90	0	-7.17894	0	0	0	0	0.375
219	10	120	4.49855	4.50285	65.457	65.4372	0.846857	0.874699	0	0	0	90	0	-7.08033	0	0	0	0	0.375
220	10	180	4.36607	4.37308	70.3135	70.2789	0.581139	0.600245	0	0	0	90	0	-6.99825	0	0	0	0	0.375
221	10	240	4.23281	4.24331	75.176	75.1206	0.263593	0.272259	0	0	0	90	4.19814e-06	-6.93065	0	0	0	0	0.375
222	10	300	4.10191	4.11354	81.1802	81.1139	0.212592	0.219581	0	0	0	90	0.437329	-6.76702	0	0	0	0	0.375
223	10	360	4.54831	4.49281	80.7992	81.1139	0.496614	0.512941	0	0	0	81.1318	86.9459	-6.32007	0	0	0	0	0.375
224	10	420	6.19089	6.00274	73.0871	74.0441	0.780636	0.806301	0	0	0	68.1062	244.418	-4.86907	0	0	0	0	0.375
225	10	480	8.70994	8.39907	64.0626	65.4269	1.06466	1.09966	0	0	0	54.7808	392.409	-2.49023	0	0	0	0	0.375
226	10	540	11.6984	11.3003	55.3316	56.8097	1.34868	1.39302	0	0	0	41.2595	530.492	0.413983	0	0	0	0	0.375
227	10	600	14.6951	14.2444	46.808	48.1925	1.6327	1.68638	0	0	0	27.6214	631.768	3.28426	0	0	0	0	0.375
228	10	660	17.2279	16.7627	30.0583	30.9581	1.91673	1.97974	0	0	0	13.9621	700.232	4.7251	0	0	0	0	0.375
229	10	720	18.884	18.4543	30.1366	30.9581	2.48477	2.56646	0	0	0	2.21744	722.532	6.67566	0	0	0	0	0.375
230	10	780	19.475	19.0497	32.1839	33.048	2.48477	2.56646	0	0	0	13.9621	699.841	7.58268	0	0	0	0	0.375
231	10	840	18.8695	18.4543	34.2362	35.1378	2.38381	2.46218	0	0	0	27.6214	633.981	7.10083	0	0	0	0	0.375
232	10	900	17.1486	16.7627	36.3274	37.2276	2.28284	2.3579	0	0	0	41.2595	533.286	5.33741	0	0	0	0	0.375
233	10	960	14.5737	14.2444	38.4885	39.3174	2.18188	2.25361	0	0	0	54.7808	395.171	2.60585	0	0	0	0	0.375
234	10	1020	11.551	11.3003	40.7251	41.4072	2.08092	2.14933	0	0	0	68.1062	246.573	-0.626451	0	0	0	0	0.375
235	10	1080	8.54964	8.39906	43.0551	43.4971	1.97996	2.04505	0	0	0	81.1318	87.8679	-3.81527	0	0	0	0	0.375
236	10	1140	6.8978	6.83191	45.381	45.5869	1.87899	1.94077	0	0	0	90	0.441534	-5.47266	0	0	0	0	0.375
237	10	1200	6.20534	6.17492	47.5766	47.6767	1.77803	1.83649	0	0	0	90	4.2109e-06	-6.08838	0	0	0	0	0.375
238	10	1260	5.69654	5.6778	49.7019	49.7665	1.67707	1.73221	0	0	0	90	0	-6.52617	0	0	0	0	0.375
239	10	1320	5.31499	5.30165	51.8082	51.8564	1.57611	1.62792	0	0	0	90	0	-6.83016	0	0	0	0	0.375
240	10	1380	5.02164	5.01703	53.9288	53.9462	1.47514	1.52364	0	0	0	90	0	-7.03368	0	0	0	0	0.375
241	11	0	4.80655	4.80166	56.0169	56.036	1.37418	1.41936	0	0	0	90	0	-7.16191	0	0	0	0	0.375
242	11	60	4.67195	4.67244	60.8809	60.8788	1.10943	1.14591	0	0	0	90	0	-7.04715	0	0	0	0	0.375
243	11	120	4.54009	4.54323	65.7361	65.7216	0.844684	0.872455	0	0	0	90	0	-6.95109	0	0	0	0	0.375
244	11	180	4.40836	4.41401	70.5924	70.5644	0.579936	0.599002	0	0	0	90	0	-6.87126	0	0	0	0	0.375
245	11	240	4.27601	4.2848	75.4537	75.4072	0.26283	0.271471	0	0	0	90	3.84639e-06	-6.80566	0	0	0	0	0.375
246	11	300	4.14575	4.15558	81.4612	81.4049	0.211057	0.217996	0	0	0	90	0.406737	-6.64704	0	0	0	0	0.375
247	11	360	4.5859	4.52977	81.0857	81.4049	0.494372	0.510625	0	0	0	81.1892	85.9152	-6.20659	0	0	0	0	0.375
248	11	420	6.21755	6.02997	73.3949	74.3527	0.777687	0.803255	0	0	0	68.1532	242.785	-4.76515	0	0	0	0	0.375
249	11	480	8.7233	8.41359	64.3583	65.7235	1.061	1.09588	0	0	0	54.8191	390.28	-2.40048	0	0	0	0	0.375
250	11	540	11.6975	11.3008	55.6141	57.0944	1.34432	1.38851	0	0	0	41.2911	527.909	0.488234	0	0	0	0	0.375
251	11	600	14.6808	14.2316	47.0773	48.4652	1.62763	1.68114	0	0	0	27.6489	628.869	3.34514	0	0	0	0	0.375
252	11	660	17.2027	16.7388	30.3023	31.2069	1.91095	1.97377	0	0	0	13.9939	697.14	4.79103	0	0	0	0	0.375
253	11	720	18.8518	18.4231	30.3807	31.2069	2.47758	2.55903	0	0	0	2.36631	719.369	6.73048	0	0	0	0	0.375
254	11	780	19.4403	19.0161	32.4298	33.2985	2.47758	2.55903	0	0	0	13.9939	696.747	7.62997	0	0	0	0	0.375
255	11	840	18.8375	18.4231	34.4839	35.3901	2.37691	2.45505	0	0	0	27.6489	631.096	7.14868	0	0	0	0	0.375
256	11	900	17.124	16.7388	36.5769	37.4817	2.27624	2.35107	0	0	0	41.2911	530.72	5.39343	0	0	0	0	0.375
257	11	960	14.5604	14.2316	38.7401	39.5733	2.17557	2.24709	0	0	0	54.8191	393.058	2.67611	0	0	0	0	0.375
258	11	1020	11.5513	11.3008	40.979	41.6649	2.0749	2.14311	0	0	0	68.1532	244.949	-0.538293	0	0	0	0	0.375
259	11	1080	8.56432	8.41359	43.3114	43.7564	1.97423	2.03913	0	0	0	81.1892	86.8366	-3.70843	0	0	0	0	0.375
260	11	1140	6.92583	6.85933	45.6391	45.848	1.87356	1.93515	0	0	0	90	0.41069	-5.35046	0	0	0	0	0.375
261	11	1200	6.23663	6.20544	47.8365	47.9396	1.77289	1.83117	0	0	0	90	3.859e-06	-5.96349	0	0	0	0	0.375
262	11	1260	5.73013	5.71059	49.9634	50.0312	1.67222	1.72719	0	0	0	90	0	-6.39969	0	0	0	0	0.375
263	11	1320	5.35018	5.33608	52.0717	52.1228	1.57154	1.62321	0	0	0	90	0	-6.70289	0	0	0	0	0.375
264	11	1380	5.05823	5.05266	54.1933	54.2144	1.47087	1.51923	0	0	0	90	0	-6.90621	0	0	0	0	0.375
265	12	0	4.84381	4.83817	56.2838	56.3059	1.3702	1.41525	0	0	0	90	0	-7.03464	0	0	0	0	0.375
266	12	60	4.70994	4.70948	61.1475	61.1494	1.1064	1.14278	0	0	0	90	0	-6.92266	0	0	0	0	0.375
267	12	120	4.57873	4.58078	66.0024	65.9929	0.842603	0.870305	0	0	0	90	0	-6.82905	0	0	0	0	0.375
268	12	180	4.4477	4.45209	70.8582	70.8364	0.578803	0.597832	0	0	0	90	0	-6.75139	0	0	0	0	0.375
269	12	240	4.3162	4.32339	75.718	75.6799	0.262096	0.270713	0	0	0	90	3.51103e-06	-6.68772	0	0	0	0	0.375
270	12	300	4.18654	4.19469	81.728	81.6812	0.209509	0.216397	0	0	0	90	0.377134	-6.53423	0	0	0	0	0.375
271	12	360	4.62044	4.56378	81.358	81.6812	0.492153	0.508333	0	0	0	81.2494	84.8758	-6.10024	0	0	0	0	0.375
272	12	420	6.24146	6.05454	73.6899	74.6481	0.774797	0.80027	0	0	0	68.2025	241.173	-4.66806	0	0	0	0	0.375
273	12	480	8.73451	8.42598	64.6415	66.0073	1.05744	1.09221	0	0	0	54.8596	388.205	-2.31695	0	0	0	0	0.375
274	12	540	11.6952	11.2999	55.8844	57.3665	1.34009	1.38414	0	0	0	41.3246	525.41	0.557039	0	0	0	0	0.375
275	12	600	14.6657	14.218	47.3348	48.7257	1.62273	1.67608	0	0	0	27.6784	626.074	3.4013	0	0	0	0	0.375
276	12	660	17.1774	16.7149	30.5351	31.444	1.90537	1.96802	0	0	0	14.0288	694.167	4.85192	0	0	0	0	0.375
277	12	720	18.8199	18.3924	30.6134	31.444	2.47066	2.55189	0	0	0	2.52228	716.335	6.78093	0	0	0	0	0.375
278	12	780	19.4062	18.983	32.6641	33.5372	2.47066	2.55189	0	0	0	14.0288	693.771	7.67331	0	0	0	0	0.375
279	12	840	18.8058	18.3924	34.7199	35.6305	2.37027	2.4482	0	0	0	27.6784	628.315	7.19254	0	0	0	0	0.375
280	12	900	17.0993	16.7149	36.8147	37.7237	2.26988	2.34451	0	0	0	41.3246	528.238	5.44499	0	0	0	0	0.375
281	12	960	14.5463	14.218	38.9798	39.8169	2.16949	2.24082	0	0	0	54.8596	390.998	2.74109	0	0	0	0	0.375
282	12	1020	11.5502	11.2999	41.2209	41.9101	2.06911	2.13713	0	0	0	68.2025	243.347	-0.456389	0	0	0	0	0.375
283	12	1080	8.57679	8.42598	43.5556	44.0033	1.96872	2.03344	0	0	0	81.2494	85.796	-3.60878	0	0	0	0	0.375
284	12	1140	6.95147	6.88442	45.8848	46.0966	1.86833	1.92975	0	0	0	90	0.380836	-5.23572	0	0	0	0	0.375
285	12	1200	6.26536	6.23346	48.0837	48.1898	1.76794	1.82606	0	0	0	90	3.52342e-06	-5.8462	0	0	0	0	0.375
286	12	1260	5.76103	5.74074	50.2123	50.283	1.66755	1.72237	0	0	0	90	0	-6.28091	0	0	0	0	0.375
287	12	1320	5.38259	5.36779	52.3223	52.3762	1.56716	1.61868	0	0	0	90	0	-6.58339	0	0	0	0	0.375
288	12	1380	5.09195	5.08549	54.4449	54.4694	1.46677	1.51499	0	0	0	90	0	-6.78652	0	0	0	0	0.375
289	13	0	4.87815	4.87181	56.5376	56.5626	1.36638	1.4113	0	0	0	90	0	-6.91517	0	0	0	0	0.375
290	13	60	4.74495	4.7436	61.4006	61.4064	1.1035	1.13978	0	0	0	90	0	-6.80585	0	0	0	0	0.375
291	13	120	4.61435	4.61539	66.2549	66.2501	0.840624	0.868261	0	0	0	90	0	-6.71458	0	0	0	0	0.375
292	13	180	4.48397	4.48718	71.1098	71.0938	0.577746	0.59674	0	0	0	90	0	-6.639	0	0	0	0	0.375
293	13	240	4.35326	4.35896	75.9679	75.9375	0.261396	0.269989	0	0	0	90	3.19323e-06	-6.57718	0	0	0	0	0.375
294	13	300	4.22415	4.23075	81.9796	81.9416	0.207951	0.214787	0	0	0	90	0.348639	-6.42893	0	0	0	0	0.375
295	13	360	4.65181	4.59473	81.615	81.9416	0.489964	0.506072	0	0	0	81.3124	83.8296	-6.00136	0	0	0	0	0.375
296	13	420	6.26256	6.07634	73.9712	74.9292	0.771977	0.797357	0	0	0	68.2543	239.588	-4.57809	0	0	0	0	0.375
297	13	480	8.74351	8.43618	64.911	66.2771	1.05399	1.08864	0	0	0	54.9021	386.19	-2.2399	0	0	0	0	0.375
298	13	540	11.6915	11.2976	56.1414	57.6249	1.336	1.37993	0	0	0	41.3601	523.002	0.620194	0	0	0	0	0.375
299	13	600	14.6501	14.2039	47.5792	48.9728	1.61802	1.67121	0	0	0	27.7102	623.394	3.4526	0	0	0	0	0.375
300	13	660	17.1521	16.6911	30.7555	31.6685	1.90003	1.9625	0	0	0	14.067	691.322	4.90766	0	0	0	0	0.375
301	13	720	18.7887	18.3622	30.8338	31.6685	2.46406	2.54507	0	0	0	2.68527	713.429	6.8269	0	0	0	0	0.375
302	13	780	19.3728	18.9506	32.8861	33.7632	2.46406	2.54507	0	0	0	14.067	690.924	7.71265	0	0	0	0	0.375
303	13	840	18.7747	18.3622	34.9433	35.8579	2.36394	2.44165	0	0	0	27.7102	625.648	7.23235	0	0	0	0	0.375
304	13	900	17.0747	16.6911	37.0397	37.9527	2.26381	2.33824	0	0	0	41.3601	525.846	5.49197	0	0	0	0	0.375
305	13	960	14.5316	14.2038	39.2066	40.0474	2.16369	2.23483	0	0	0	54.9021	388.997	2.80062	0	0	0	0	0.375
306	13	1020	11.5476	11.2976	41.4498	42.1421	2.06357	2.13142	0	0	0	68.2543	241.769	-0.380975	0	0	0	0	0.375
307	13	1080	8.58702	8.43618	43.7866	44.2368	1.96345	2.028	0	0	0	81.3124	84.7479	-3.51662	0	0	0	0	0.375
308	13	1140	6.97464	6.9071	46.1171	46.3315	1.86333	1.92459	0	0	0	90	0.352094	-5.12879	0	0	0	0	0.375
309	13	1200	6.29145	6.25889	48.3175	48.4262	1.76321	1.82118	0	0	0	90	3.20535e-06	-5.73687	0	0	0	0	0.375
310	13	1260	5.78915	5.76815	50.4475	50.5209	1.66309	1.71777	0	0	0	90	0	-6.17019	0	0	0	0	0.375
311	13	1320	5.41211	5.39664	52.5591	52.6157	1.56297	1.61435	0	0	0	90	0	-6.472	0	0	0	0	0.375
312	13	1380	5.12268	5.11539	54.6826	54.7104	1.46285	1.51094	0	0	0	90	0	-6.67499	0	0	0	0	0.375
313	14	0	4.90945	4.90246	56.7773	56.8051	1.36273	1.40753	0	0	0	90	0	-6.80386	0	0	0	0	0.375
314	14	60	4.77687	4.77469	61.6392	61.6486	1.10074	1.13693	0	0	0	90	0	-6.69707	0	0	0	0	0.375
315	14	120	4.64683	4.64692	66.4925	66.4921	0.838757	0.866332	0	0	0	90	0	-6.60803	0	0	0	0	0.375
316	14	180	4.51705	4.51916	71.3461	71.3356	0.576772	0.595734	0	0	0	90	0	-6.53444	0	0	0	0	0.375
317	14	240	4.38707	4.39139	76.2021	76.1791	0.260731	0.269303	0	0	0	90	2.89382e-06	-6.4744	0	0	0	0	0.375
318	14	300	4.25846	4.26362	82.2148	82.185	0.206385	0.213171	0	0	0	90	0.321353	-6.33148	0	0	0	0	0.375
319	14	360	4.67992	4.6225	81.8556	82.185	0.487811	0.503848	0	0	0	81.3781	82.7783	-5.91026	0	0	0	0	0.375
320	14	420	6.28076	6.09528	74.2374	75.1949	0.769236	0.794526	0	0	0	68.3084	238.032	-4.49554	0	0	0	0	0.375
321	14	480	8.75027	8.44414	65.1659	66.5318	1.05066	1.0852	0	0	0	54.9468	384.242	-2.16958	0	0	0	0	0.375
322	14	540	11.6864	11.2938	56.384	57.8687	1.33209	1.37588	0	0	0	41.3977	520.693	0.677495	0	0	0	0	0.375
323	14	600	14.6338	14.1891	47.8098	49.2056	1.61351	1.66656	0	0	0	27.7442	620.838	3.49888	0	0	0	0	0.375
324	14	660	17.1271	16.6673	30.9628	31.8795	1.89494	1.95724	0	0	0	14.1087	688.617	4.9581	0	0	0	0	0.375
325	14	720	18.758	18.3326	31.0411	31.8795	2.45779	2.53859	0	0	0	2.85521	710.667	6.86832	0	0	0	0	0.375
326	14	780	19.3402	18.919	33.0946	33.9755	2.45779	2.53859	0	0	0	14.1087	688.217	7.74792	0	0	0	0	0.375
327	14	840	18.7442	18.3326	35.1533	36.0716	2.35792	2.43544	0	0	0	27.7442	623.105	7.26803	0	0	0	0	0.375
328	14	900	17.0502	16.6673	37.2512	38.1677	2.25806	2.33229	0	0	0	41.3977	523.552	5.53426	0	0	0	0	0.375
329	14	960	14.5163	14.1891	39.4197	40.2637	2.15819	2.22914	0	0	0	54.9468	387.062	2.85453	0	0	0	0	0.375
330	14	1020	11.5435	11.2938	41.6647	42.3598	2.05832	2.12599	0	0	0	68.3084	240.221	-0.312288	0	0	0	0	0.375
331	14	1080	8.59496	8.44414	44.0035	44.4559	1.95846	2.02284	0	0	0	81.3781	83.694	-3.43226	0	0	0	0	0.375
332	14	1140	6.99525	6.92728	46.3351	46.5519	1.85859	1.9197	0	0	0	90	0.324566	-5.02999	0	0	0	0	0.375
333	14	1200	6.3148	6.28162	48.5367	48.648	1.75873	1.81655	0	0	0	90	2.90563e-06	-5.63585	0	0	0	0	0.375
334	14	1260	5.81438	5.79273	50.668	50.7441	1.65886	1.7134	0	0	0	90	0	-6.0679	0	0	0	0	0.375
335	14	1320	5.43863	5.42254	52.7811	52.8401	1.55899	1.61025	0	0	0	90	0	-6.3691	0	0	0	0	0.375
336	14	1380	5.15032	5.14224	54.9053	54.9362	1.45913	1.5071	0	0	0	90	0	-6.57197	0	0	0	0	0.375
337	15	0	4.93761	4.93	57.002	57.0323	1.35926	1.40395	0	0	0	90	0	-6.70107	0	0	0	0	0.375
338	15	60	4.80559	4.80263	61.8623	61.875	1.09814	1.13424	0	0	0	90	0	-6.59669	0	0	0	0	0.375
339	15	120	4.67605	4.67527	66.7142	66.7178	0.837012	0.86453	0	0	0	90	0	-6.50977	0	0	0	0	0.375
340	15	180	4.54682	4.5479	71.566	71.5606	0.575888	0.594822	0	0	0	90	0	-6.43806	0	0	0	0	0.375
341	15	240	4.41751	4.42054	76.4196	76.4034	0.260105	0.268657	0	0	0	90	0	-6.37972	0	0	0	0	0.375
342	15	300	4.28936	4.29317	82.4324	82.4103	0.204817	0.21155	0	0	0	90	0.295351	-6.24222	0	0	0	0	0.375
343	15	360	4.70463	4.64695	82.0786	82.4103	0.485701	0.50167	0	0	0	81.4465	81.7234	-5.82729	0	0	0	0	0.375
344	15	420	6.29597	6.11126	74.4875	75.444	0.766586	0.791789	0	0	0	68.3649	236.511	-4.42072	0	0	0	0	0.375
345	15	480	8.75473	8.44981	65.405	66.7704	1.04747	1.08191	0	0	0	54.9937	382.365	-2.10626	0	0	0	0	0.375
346	15	540	11.6798	11.2886	56.6112	58.0968	1.32836	1.37203	0	0	0	41.4374	518.493	0.72874	0	0	0	0	0.375
347	15	600	14.6171	14.1737	48.0253	49.4232	1.60924	1.66215	0	0	0	27.7805	618.415	3.54	0	0	0	0	0.375
348	15	660	17.1023	16.6438	31.1559	32.0759	1.89012	1.95227	0	0	0	14.1541	686.061	5.00312	0	0	0	0	0.375
349	15	720	18.7282	18.3038	31.2342	32.0759	2.45189	2.5325	0	0	0	3.03201	708.061	6.90508	0	0	0	0	0.375
350	15	780	19.3086	18.8883	33.2889	34.1732	2.45189	2.5325	0	0	0	14.1541	685.66	7.77903	0	0	0	0	0.375
351	15	840	18.7146	18.3038	35.3488	36.2705	2.35227	2.4296	0	0	0	27.7805	620.694	7.29949	0	0	0	0	0.375
352	15	900	17.026	16.6438	37.448	38.3677	2.25264	2.3267	0	0	0	41.4374	521.366	5.57174	0	0	0	0	0.375
353	15	960	14.5005	14.1737	39.618	40.465	2.15301	2.2238	0	0	0	54.9937	385.197	2.90265	0	0	0	0	0.375
354	15	1020	11.538	11.2886	41.8648	42.5623	2.05339	2.12089	0	0	0	68.3649	238.706	-0.250565	0	0	0	0	0.375
355	15	1080	8.60056	8.4498	44.2054	44.6595	1.95376	2.01799	0	0	0	81.4465	82.6358	-3.356	0	0	0	0	0.375
356	15	1140	7.01325	6.94488	46.5379	46.7568	1.85413	1.91509	0	0	0	90	0.298329	-4.93965	0	0	0	0	0.375
357	15	1200	6.33534	6.30158	48.7404	48.8541	1.75451	1.81219	0	0	0	90	0	-5.54347	0	0	0	0	0.375
358	15	1260	5.83665	5.81438	50.8728	50.9513	1.65488	1.70929	0	0	0	90	0	-5.97435	0	0	0	0	0.375
359	15	1320	5.46207	5.44541	52.9872	53.0486	1.55525	1.60638	0	0	0	90	0	-6.27502	0	0	0	0	0.375
360	15	1380	5.17477	5.16597	55.1121	55.1459	1.45563	1.50348	0	0	0	90	0	-6.47781	0	0	0	0	0.375
361	16	0	4.96253	4.95433	57.2104	57.2431	1.356	1.40058	0	0	0	90	0	-6.60715	0	0	0	0	0.375
362	16	60	4.83101	4.82733	62.0688	62.0847	1.0957	1.13172	0	0	0	90	0	-6.50502	0	0	0	0	0.375
363	16	120	4.70193	4.70033	66.9188	66.9263	0.835403	0.862868	0	0	0	90	0	-6.42011	0	0	0	0	0.375
364	16	180	4.5732	4.57332	71.7686	71.768	0.575104	0.594012	0	0	0	90	0	-6.35018	0	0	0	0	0.375
365	16	240	4.44449	4.44632	76.6194	76.6096	0.259522	0.268054	0	0	0	90	0	-6.29343	0	0	0	0	0.375
366	16	300	4.31676	4.31932	82.6316	82.6167	0.203247	0.209929	0	0	0	90	0.27069	-6.16139	0	0	0	0	0.375
367	16	360	4.72589	4.66802	82.2831	82.6167	0.48364	0.499541	0	0	0	81.5176	80.6662	-5.75266	0	0	0	0	0.375
368	16	420	6.30813	6.12423	74.7206	75.6758	0.764034	0.789152	0	0	0	68.4237	235.027	-4.35384	0	0	0	0	0.375
369	16	480	8.75689	8.45314	65.6274	66.9921	1.04443	1.07876	0	0	0	55.0427	380.566	-2.05012	0	0	0	0	0.375
370	16	540	11.6718	11.282	56.8223	58.3084	1.32482	1.36838	0	0	0	41.4792	516.406	0.773789	0	0	0	0	0.375
371	16	600	14.5999	14.1579	48.2252	49.6247	1.60521	1.65799	0	0	0	27.8193	616.134	3.57585	0	0	0	0	0.375
372	16	660	17.0779	16.6206	31.3343	32.2573	1.88561	1.9476	0	0	0	14.2033	683.663	5.04263	0	0	0	0	0.375
373	16	720	18.6993	18.2758	31.4125	32.2573	2.44639	2.52682	0	0	0	3.2156	705.619	6.93715	0	0	0	0	0.375
374	16	780	19.2781	18.8587	33.4683	34.3556	2.44639	2.52682	0	0	0	14.2033	683.26	7.80596	0	0	0	0	0.375
375	16	840	18.6857	18.2758	35.5292	36.4539	2.34699	2.42415	0	0	0	27.8193	618.424	7.32669	0	0	0	0	0.375
376	16	900	17.002	16.6206	37.6296	38.5522	2.24759	2.32148	0	0	0	41.4792	519.292	5.60435	0	0	0	0	0.375
377	16	960	14.4841	14.1579	39.801	40.6505	2.14818	2.21881	0	0	0	55.0427	383.409	2.94487	0	0	0	0	0.375
378	16	1020	11.531	11.282	42.0492	42.7488	2.04878	2.11614	0	0	0	68.4237	237.227	-0.195967	0	0	0	0	0.375
379	16	1080	8.60378	8.45314	44.3914	44.8471	1.94938	2.01347	0	0	0	81.5176	81.5745	-3.28805	0	0	0	0	0.375
380	16	1140	7.02859	6.95988	46.7246	46.9454	1.84997	1.91079	0	0	0	90	0.273441	-4.85798	0	0	0	0	0.375
381	16	1200	6.35306	6.31877	48.9279	49.0438	1.75057	1.80812	0	0	0	90	0	-5.4599	0	0	0	0	0.375
382	16	1260	5.85596	5.83313	51.0612	51.1421	1.65117	1.70545	0	0	0	90	0	-5.8897	0	0	0	0	0.375
383	16	1320	5.48247	5.46527	53.1768	53.2404	1.55176	1.60278	0	0	0	90	0	-6.18989	0	0	0	0	0.375
384	16	1380	5.19609	5.18661	55.3022	55.3387	1.45236	1.50011	0	0	0	90	0	-6.39261	0	0	0	0	0.375
385	17	0	4.98426	4.97553	57.402	57.437	1.35296	1.39744	0	0	0	90	0	-6.52218	0	0	0	0	0.375
386	17	60	4.8532	4.84885	62.258	62.2769	1.09345	1.1294	0	0	0	90	0	-6.42216	0	0	0	0	0.375
387	17	120	4.72454	4.72217	67.1058	67.1169	0.833942	0.861359	0	0	0	90	0	-6.33911	0	0	0	0	0.375
388	17	180	4.59625	4.5955	71.953	71.9568	0.574435	0.59332	0	0	0	90	0	-6.27085	0	0	0	0	0.375
389	17	240	4.46809	4.46882	76.8007	76.7968	0.258979	0.267494	0	0	0	90	0	-6.21559	0	0	0	0	0.375
390	17	300	4.34073	4.34214	82.8128	82.8046	0.201676	0.208306	0	0	0	90	0.247401	-6.08883	0	0	0	0	0.375
391	17	360	4.74376	4.68579	82.4697	82.8046	0.481626	0.49746	0	0	0	81.5914	79.6068	-5.68622	0	0	0	0	0.375
392	17	420	6.31733	6.13426	74.9372	75.8907	0.761576	0.786614	0	0	0	68.485	233.58	-4.29474	0	0	0	0	0.375
393	17	480	8.75679	8.45421	65.8337	67.1973	1.04153	1.07577	0	0	0	55.094	378.843	-2.00101	0	0	0	0	0.375
394	17	540	11.6625	11.2739	57.0175	58.5039	1.32148	1.36492	0	0	0	41.5232	514.434	0.812763	0	0	0	0	0.375
395	17	600	14.5823	14.1416	48.4097	49.8105	1.60143	1.65408	0	0	0	27.8606	613.993	3.60654	0	0	0	0	0.375
396	17	660	17.0539	16.5977	31.4982	32.4238	1.88138	1.94323	0	0	0	14.2566	681.422	5.07677	0	0	0	0	0.375
397	17	720	18.6712	18.2487	31.5763	32.4238	2.44128	2.52154	0	0	0	3.40587	703.339	6.96462	0	0	0	0	0.375
398	17	780	19.2486	18.8301	33.633	34.523	2.44128	2.52154	0	0	0	14.2566	681.017	7.82881	0	0	0	0	0.375
399	17	840	18.6578	18.2487	35.6949	36.6222	2.34208	2.41908	0	0	0	27.8606	616.293	7.34973	0	0	0	0	0.375
400	17	900	16.9784	16.5977	37.7963	38.7214	2.24289	2.31663	0	0	0	41.5232	517.331	5.63218	0	0	0	0	0.375
401	17	960	14.4672	14.1416	39.9687	40.8206	2.14369	2.21417	0	0	0	55.094	381.696	2.98131	0	0	0	0	0.375
402	17	1020	11.5226	11.2739	42.2183	42.9198	2.0445	2.11171	0	0	0	68.485	235.784	-0.148353	0	0	0	0	0.375
403	17	1080	8.60469	8.45421	44.562	45.019	1.9453	2.00926	0	0	0	81.5914	80.5104	-3.22824	0	0	0	0	0.375
404	17	1140	7.04135	6.97236	46.8956	47.1182	1.84611	1.9068	0	0	0	90	0.249933	-4.78481	0	0	0	0	0.375
405	17	1200	6.36805	6.33328	49.0994	49.2174	1.74691	1.80434	0	0	0	90	0	-5.38495	0	0	0	0	0.375
406	17	1260	5.87243	5.84908	51.2336	51.3166	1.64772	1.70189	0	0	0	90	0	-5.81375	0	0	0	0	0.375
407	17	1320	5.49992	5.48223	53.3502	53.4158	1.54852	1.59943	0	0	0	90	0	-6.1135	0	0	0	0	0.375
408	17	1380	5.21438	5.20428	55.476	55.515	1.44932	1.49697	0	0	0	90	0	-6.31617	0	0	0	0	0.375
409	18	0	5.00293	4.9937	57.5771	57.6142	1.35013	1.39452	0	0	0	90	0	-6.44595	0	0	0	0	0.375
410	18	60	4.87228	4.86731	62.4304	62.452	1.09138	1.12726	0	0	0	90	0	-6.34789	0	0	0	0	0.375
411	18	120	4.74399	4.74092	67.2755	67.2899	0.83263	0.860004	0	0	0	90	0	-6.26658	0	0	0	0	0.375
412	18	180	4.61611	4.61454	72.1198	72.1277	0.57388	0.592747	0	0	0	90	0	-6.19986	0	0	0	0	0.375
413	18	240	4.48844	4.48815	76.964	76.9655	0.258476	0.266973	0	0	0	90	0	-6.14599	0	0	0	0	0.375
414	18	300	4.36142	4.36176	82.9767	82.9747	0.200102	0.206681	0	0	0	90	0.2255	-6.02425	0	0	0	0	0.375
415	18	360	4.75838	4.70037	82.6388	82.9747	0.479656	0.495425	0	0	0	81.6679	78.5452	-5.62771	0	0	0	0	0.375
416	18	420	6.32366	6.14145	75.1377	76.0893	0.759209	0.784169	0	0	0	68.5486	232.168	-4.24318	0	0	0	0	0.375
417	18	480	8.75452	8.45309	66.0242	67.3866	1.03876	1.07291	0	0	0	55.1474	377.196	-1.95872	0	0	0	0	0.375
418	18	540	11.6519	11.2645	57.1975	58.6839	1.31832	1.36166	0	0	0	41.5694	512.572	0.845844	0	0	0	0	0.375
419	18	600	14.5642	14.1248	48.5793	49.9813	1.59787	1.6504	0	0	0	27.9046	611.99	3.63222	0	0	0	0	0.375
420	18	660	17.0302	16.5751	31.648	32.576	1.87742	1.93915	0	0	0	14.3142	679.335	5.10569	0	0	0	0	0.375
421	18	720	18.644	18.2224	31.7261	32.576	2.43653	2.51664	0	0	0	3.60276	701.22	6.98765	0	0	0	0	0.375
422	18	780	19.2202	18.8025	33.7836	34.6759	2.43653	2.51664	0	0	0	14.3142	678.929	7.84769	0	0	0	0	0.375
423	18	840	18.6307	18.2224	35.8462	36.7759	2.33753	2.41438	0	0	0	27.9046	614.3	7.36873	0	0	0	0	0.375
424	18	900	16.9552	16.5751	37.9485	38.8758	2.23853	2.31212	0	0	0	41.5694	515.481	5.65538	0	0	0	0	0.375
425	18	960	14.4499	14.1248	40.122	40.9758	2.13952	2.20986	0	0	0	55.1474	380.057	3.01213	0	0	0	0	0.375
426	18	1020	11.5128	11.2645	42.3728	43.0757	2.04052	2.10761	0	0	0	68.5486	234.375	-0.107514	0	0	0	0	0.375
427	18	1080	8.60337	8.45309	44.7177	45.1757	1.94152	2.00535	0	0	0	81.6679	79.4433	-3.17633	0	0	0	0	0.375
428	18	1140	7.05164	6.9824	47.0515	47.2756	1.84252	1.90309	0	0	0	90	0.227823	-4.71985	0	0	0	0	0.375
429	18	1200	6.38042	6.3452	49.2557	49.3756	1.74351	1.80083	0	0	0	90	0	-5.31834	0	0	0	0	0.375
430	18	1260	5.88616	5.86233	51.3906	51.4755	1.64451	1.69858	0	0	0	90	0	-5.74622	0	0	0	0	0.375
431	18	1320	5.51455	5.4964	53.5079	53.5755	1.54551	1.59632	0	0	0	90	0	-6.04556	0	0	0	0	0.375
432	18	1380	5.22977	5.2191	55.634	55.6754	1.44651	1.49406	0	0	0	90	0	-6.24819	0	0	0	0	0.375
433	19	0	5.01865	5.00896	57.7363	57.7753	1.3475	1.3918	0	0	0	90	0	-6.37819	0	0	0	0	0.375
434	19	60	4.88836	4.88282	62.5864	62.6106	1.08948	1.1253	0	0	0	90	0	-6.28194	0	0	0	0	0.375
435	19	120	4.76041	4.75669	67.4284	67.4459	0.831458	0.858794	0	0	0	90	0	-6.20223	0	0	0	0	0.375
436	19	180	4.63289	4.63056	72.2695	72.2812	0.573436	0.592288	0	0	0	90	0	-6.13694	0	0	0	0	0.375
437	19	240	4.50567	4.50443	77.1099	77.1165	0.258009	0.266492	0	0	0	90	0	-6.08435	0	0	0	0	0.375
438	19	300	4.37895	4.3783	83.124	83.1278	0.198525	0.205051	0	0	0	90	0.204987	-5.96742	0	0	0	0	0.375
439	19	360	4.76988	4.71188	82.7914	83.1278	0.477726	0.493432	0	0	0	81.747	77.4811	-5.57686	0	0	0	0	0.375
440	19	420	6.32724	6.1459	75.323	76.2722	0.756927	0.781812	0	0	0	68.6145	230.792	-4.19892	0	0	0	0	0.375
441	19	480	8.75016	8.44986	66.1998	67.5607	1.03613	1.07019	0	0	0	55.2031	375.622	-1.92304	0	0	0	0	0.375
442	19	540	11.64	11.2538	57.3628	58.8491	1.31533	1.35857	0	0	0	41.6179	510.821	0.873203	0	0	0	0	0.375
443	19	600	14.5458	14.1075	48.7347	50.1375	1.59453	1.64695	0	0	0	27.9513	610.123	3.65303	0	0	0	0	0.375
444	19	660	17.0068	16.5527	31.7845	32.7144	1.87373	1.93533	0	0	0	14.3762	677.4	5.12956	0	0	0	0	0.375
445	19	720	18.6177	18.1969	31.8625	32.7144	2.43214	2.5121	0	0	0	3.80616	699.259	7.00635	0	0	0	0	0.375
446	19	780	19.1928	18.7759	33.9205	34.815	2.43214	2.5121	0	0	0	14.3762	676.993	7.86271	0	0	0	0	0.375
447	19	840	18.6045	18.1969	35.9838	36.9155	2.33331	2.41002	0	0	0	27.9513	612.441	7.3838	0	0	0	0	0.375
448	19	900	16.9322	16.5527	38.0868	39.0161	2.23449	2.30795	0	0	0	41.6179	513.739	5.67407	0	0	0	0	0.375
449	19	960	14.4321	14.1075	40.2612	41.1166	2.13566	2.20588	0	0	0	55.2031	378.49	3.03751	0	0	0	0	0.375
450	19	1020	11.5017	11.2538	42.513	43.2172	2.03684	2.1038	0	0	0	68.6145	233.001	-0.0732485	0	0	0	0	0.375
451	19	1080	8.5999	8.44986	44.8591	45.3178	1.93802	2.00173	0	0	0	81.747	78.3731	-3.13207	0	0	0	0	0.375
452	19	1140	7.05954	6.99011	47.1929	47.4183	1.83919	1.89966	0	0	0	90	0.207111	-4.66286	0	0	0	0	0.375
453	19	1200	6.39026	6.35464	49.3973	49.5189	1.74037	1.79759	0	0	0	90	0	-5.25982	0	0	0	0	0.375
454	19	1260	5.89725	5.87298	51.5327	51.6194	1.64154	1.69551	0	0	0	90	0	-5.68685	0	0	0	0	0.375
455	19	1320	5.52646	5.50789	53.6507	53.72	1.54272	1.59344	0	0	0	90	0	-5.98582	0	0	0	0	0.375
456	19	1380	5.24237	5.23116	55.777	55.8205	1.4439	1.49137	0	0	0	90	0	-6.18842	0	0	0	0	0.375
457	20	0	5.03153	5.02141	57.8802	57.9211	1.34507	1.38929	0	0	0	90	0	-6.31862	0	0	0	0	0.375
458	20	60	4.90158	4.89551	62.7269	62.7534	1.08775	1.12351	0	0	0	90	0	-6.22403	0	0	0	0	0.375
459	20	120	4.77391	4.76961	67.5654	67.5858	0.830422	0.857724	0	0	0	90	0	-6.14579	0	0	0	0	0.375
460	20	180	4.64672	4.6437	72.4029	72.4181	0.573097	0.591939	0	0	0	90	0	-6.08183	0	0	0	0	0.375
461	20	240	4.5199	4.5178	77.2391	77.2505	0.257578	0.266047	0	0	0	90	0	-6.03043	0	0	0	0	0.375
462	20	300	4.39346	4.39189	83.2553	83.2644	0.196943	0.203417	0	0	0	90	0.18585	-5.91807	0	0	0	0	0.375
463	20	360	4.77837	4.72046	82.928	83.2644	0.475834	0.491478	0	0	0	81.8286	76.4143	-5.53343	0	0	0	0	0.375
464	20	420	6.32817	6.14773	75.4936	76.4402	0.754725	0.779538	0	0	0	68.6828	229.45	-4.16173	0	0	0	0	0.375
465	20	480	8.74379	8.4446	66.361	67.7201	1.03362	1.0676	0	0	0	55.261	374.12	-1.89377	0	0	0	0	0.375
466	20	540	11.6269	11.2418	57.5141	59	1.31251	1.35566	0	0	0	41.6688	509.176	0.895007	0	0	0	0	0.375
467	20	600	14.527	14.0898	48.8765	50.2799	1.5914	1.64372	0	0	0	28.0008	608.389	3.66911	0	0	0	0	0.375
468	20	660	16.9838	16.5307	31.9079	32.8397	1.87029	1.93178	0	0	0	14.4428	675.614	5.1485	0	0	0	0	0.375
469	20	720	18.5921	18.1721	31.9859	32.8397	2.42807	2.5079	0	0	0	4.01599	697.452	7.02086	0	0	0	0	0.375
470	20	780	19.1664	18.7502	34.0445	34.9407	2.42807	2.5079	0	0	0	14.4428	675.206	7.87399	0	0	0	0	0.375
471	20	840	18.579	18.1721	36.1082	37.0417	2.32941	2.406	0	0	0	28.0008	610.715	7.39505	0	0	0	0	0.375
472	20	900	16.9095	16.5307	38.2118	39.1428	2.23075	2.30409	0	0	0	41.6688	512.103	5.68838	0	0	0	0	0.375
473	20	960	14.4139	14.0898	40.3869	41.2438	2.1321	2.20219	0	0	0	55.261	376.995	3.05759	0	0	0	0	0.375
474	20	1020	11.4893	11.2418	42.6397	43.3448	2.03344	2.10029	0	0	0	68.6828	231.659	-0.045367	0	0	0	0	0.375
475	20	1080	8.59435	8.44459	44.9867	45.4459	1.93478	1.99839	0	0	0	81.8286	77.2995	-3.09525	0	0	0	0	0.375
476	20	1140	7.06516	6.99557	47.3204	47.5469	1.83612	1.89648	0	0	0	90	0.187785	-4.61359	0	0	0	0	0.375
477	20	1200	6.39769	6.36171	49.5248	49.6479	1.73746	1.79458	0	0	0	90	0	-5.20912	0	0	0	0	0.375
478	20	1260	5.90582	5.88115	51.6606	51.749	1.6388	1.69268	0	0	0	90	0	-5.63537	0	0	0	0	0.375
479	20	1320	5.53577	5.51682	53.7791	53.85	1.54014	1.59078	0	0	0	90	0	-5.93401	0	0	0	0	0.375
480	20	1380	5.25229	5.2406	55.9055	55.951	1.44148	1.48887	0	0	0	90	0	-6.13659	0	0	0	0	0.375
481	21	0	5.0417	5.03119	58.0095	58.0521	1.34283	1.38697	0	0	0	90	0	-6.26699	0	0	0	0	0.375
482	21	60	4.91203	4.90548	62.8523	62.8811	1.08617	1.12188	0	0	0	90	0	-6.17391	0	0	0	0	0.375
483	21	120	4.78463	4.77978	67.6871	67.7101	0.829515	0.856786	0	0	0	90	0	-6.09703	0	0	0	0	0.375
484	21	180	4.65772	4.65407	72.5206	72.5391	0.57286	0.591693	0	0	0	90	0	-6.03427	0	0	0	0	0.375
485	21	240	4.53126	4.52836	77.3524	77.3681	0.257181	0.265636	0	0	0	90	0	-5.98396	0	0	0	0	0.375
486	21	300	4.40505	4.40266	83.3715	83.3855	0.195355	0.201778	0	0	0	90	0.168064	-5.87597	0	0	0	0	0.375
487	21	360	4.78399	4.72621	83.0494	83.3855	0.473976	0.489559	0	0	0	81.9129	75.3447	-5.49718	0	0	0	0	0.375
488	21	420	6.32656	6.14704	75.6502	76.594	0.752597	0.77734	0	0	0	68.7534	228.14	-4.13139	0	0	0	0	0.375
489	21	480	8.73548	8.43738	66.5084	67.8656	1.03122	1.06512	0	0	0	55.3211	372.688	-1.87073	0	0	0	0	0.375
490	21	540	11.6126	11.2287	57.6519	59.1373	1.30984	1.3529	0	0	0	41.722	507.637	0.911414	0	0	0	0	0.375
491	21	600	14.5078	14.0717	49.0051	50.4089	1.58846	1.64068	0	0	0	28.0532	606.785	3.68058	0	0	0	0	0.375
492	21	660	16.9611	16.5089	32.019	32.9522	1.86708	1.92846	0	0	0	14.5142	673.973	5.16267	0	0	0	0	0.375
493	21	720	18.5673	18.1481	32.0969	32.9522	2.42432	2.50403	0	0	0	4.23214	695.797	7.03127	0	0	0	0	0.375
494	21	780	19.1409	18.7254	34.1558	35.0536	2.42432	2.50403	0	0	0	14.5142	673.565	7.88161	0	0	0	0	0.375
495	21	840	18.5543	18.1481	36.22	37.155	2.32582	2.40228	0	0	0	28.0532	609.118	7.40257	0	0	0	0	0.375
496	21	900	16.8871	16.5089	38.324	39.2564	2.22731	2.30054	0	0	0	41.722	510.571	5.69843	0	0	0	0	0.375
497	21	960	14.3952	14.0717	40.4997	41.3578	2.1288	2.19879	0	0	0	55.3211	375.568	3.07252	0	0	0	0	0.375
498	21	1020	11.4757	11.2287	42.7533	43.4592	2.0303	2.09705	0	0	0	68.7534	230.349	-0.0236866	0	0	0	0	0.375
499	21	1080	8.58683	8.43738	45.1012	45.5606	1.93179	1.9953	0	0	0	81.9129	76.2225	-3.06564	0	0	0	0	0.375
500	21	1140	7.06859	6.99889	47.4345	47.6619	1.83328	1.89356	0	0	0	90	0.169822	-4.57179	0	0	0	0	0.375
501	21	1200	6.40281	6.36649	49.6388	49.7633	1.73478	1.79181	0	0	0	90	0	-5.16601	0	0	0	0	0.375
502	21	1260	5.91198	5.88694	51.7748	51.8647	1.63627	1.69007	0	0	0	90	0	-5.59154	0	0	0	0	0.375
503	21	1320	5.54259	5.52329	53.8938	53.9661	1.53777	1.58832	0	0	0	90	0	-5.88988	0	0	0	0	0.375
504	21	1380	5.25966	5.24752	56.0201	56.0675	1.43926	1.48658	0	0	0	90	0	-6.09245	0	0	0	0	0.375
505	22	0	5.04928	5.03841	58.1248	58.1689	1.34075	1.38483	0	0	0	90	0	-6.22302	0	0	0	0	0.375
506	22	60	4.91986	4.91287	62.9634	62.9942	1.08474	1.1204	0	0	0	90	0	-6.13134	0	0	0	0	0.375
507	22	120	4.79269	4.78733	67.7941	67.8195	0.82873	0.855976	0	0	0	90	0	-6.05568	0	0	0	0	0.375
508	22	180	4.66602	4.66179	72.6233	72.6448	0.572719	0.591548	0	0	0	90	0	-5.99403	0	0	0	0	0.375
509	22	240	4.53988	4.53625	77.4505	77.4701	0.256815	0.265258	0	0	0	90	0	-5.9447	0	0	0	0	0.375
510	22	300	4.41387	4.41071	83.4732	83.4916	0.193761	0.200131	0	0	0	90	0.151594	-5.84087	0	0	0	0	0.375
511	22	360	4.78685	4.72927	83.1563	83.4916	0.47215	0.487673	0	0	0	81.9996	74.272	-5.46789	0	0	0	0	0.375
512	22	420	6.32251	6.14392	75.7935	76.7341	0.750539	0.775215	0	0	0	68.8264	226.863	-4.10769	0	0	0	0	0.375
513	22	480	8.72532	8.42829	66.6427	67.9978	1.02893	1.06276	0	0	0	55.3836	371.325	-1.85371	0	0	0	0	0.375
514	22	540	11.5972	11.2143	57.7768	59.2615	1.30732	1.3503	0	0	0	41.7777	506.201	0.922578	0	0	0	0	0.375
515	22	600	14.4882	14.0531	49.1212	50.5253	1.58571	1.63784	0	0	0	28.1086	605.309	3.68757	0	0	0	0	0.375
516	22	660	16.9387	16.4873	32.1182	33.0527	1.8641	1.92538	0	0	0	14.5906	672.476	5.17218	0	0	0	0	0.375
517	22	720	18.5432	18.1247	32.196	33.0527	2.42087	2.50046	0	0	0	4.45453	694.29	7.0377	0	0	0	0	0.375
518	22	780	19.1163	18.7015	34.2552	35.1543	2.42087	2.50046	0	0	0	14.5906	672.067	7.88567	0	0	0	0	0.375
519	22	840	18.5304	18.1247	36.3196	37.2559	2.32251	2.39886	0	0	0	28.1086	607.648	7.40645	0	0	0	0	0.375
520	22	900	16.865	16.4873	38.424	39.3576	2.22414	2.29726	0	0	0	41.7777	509.141	5.70432	0	0	0	0	0.375
521	22	960	14.3762	14.0531	40.6002	41.4592	2.12578	2.19566	0	0	0	55.3836	374.209	3.08243	0	0	0	0	0.375
522	22	1020	11.4609	11.2143	42.8544	43.5608	2.02741	2.09406	0	0	0	68.8264	229.071	-0.00803254	0	0	0	0	0.375
523	22	1080	8.57739	8.42829	45.2031	45.6624	1.92904	1.99246	0	0	0	81.9996	75.1416	-3.04302	0	0	0	0	0.375
524	22	1140	7.06993	7.00015	47.5359	47.7641	1.83068	1.89086	0	0	0	90	0.153186	-4.53723	0	0	0	0	0.375
525	22	1200	6.40571	6.3691	49.7399	49.8657	1.73231	1.78926	0	0	0	90	0	-5.13024	0	0	0	0	0.375
526	22	1260	5.91584	5.89046	51.8761	51.9673	1.63394	1.68766	0	0	0	90	0	-5.55512	0	0	0	0	0.375
527	22	1320	5.54703	5.52741	53.9953	54.0689	1.53558	1.58606	0	0	0	90	0	-5.85319	0	0	0	0	0.375
528	22	1380	5.26458	5.25204	56.1215	56.1705	1.43721	1.48446	0	0	0	90	0	-6.05575	0	0	0	0	0.375
529	23	0	5.05437	5.04317	58.2267	58.2722	1.33884	1.38286	0	0	0	90	0	-6.18649	0	0	0	0	0.375
530	23	60	4.92517	4.91778	63.0609	63.0934	1.08345	1.11907	0	0	0	90	0	-6.09606	0	0	0	0	0.375
531	23	120	4.79819	4.79238	67.8871	67.9147	0.828061	0.855285	0	0	0	90	0	-6.02152	0	0	0	0	0.375
532	23	180	4.67174	4.66698	72.7118	72.736	0.57267	0.591497	0	0	0	90	0	-5.96085	0	0	0	0	0.375
533	23	240	4.54587	4.54158	77.534	77.5572	0.256478	0.264911	0	0	0	90	0	-5.91242	0	0	0	0	0.375
534	23	300	4.42004	4.41619	83.561	83.5836	0.19216	0.198477	0	0	0	90	0.136398	-5.81254	0	0	0	0	0.375
535	23	360	4.78708	4.72974	83.2493	83.5836	0.470353	0.485816	0	0	0	82.0889	73.1961	-5.44531	0	0	0	0	0.375
536	23	420	6.31613	6.1385	75.924	76.8613	0.748546	0.773155	0	0	0	68.9017	225.616	-4.09041	0	0	0	0	0.375
537	23	480	8.71339	8.41741	66.7644	68.1173	1.02674	1.06049	0	0	0	55.4483	370.03	-1.84255	0	0	0	0	0.375
538	23	540	11.5808	11.1989	57.8895	59.3734	1.30493	1.34783	0	0	0	41.8358	504.865	0.928646	0	0	0	0	0.375
539	23	600	14.4683	14.0342	49.2253	50.6295	1.58313	1.63517	0	0	0	28.1672	603.959	3.6902	0	0	0	0	0.375
540	23	660	16.9166	16.466	32.206	33.1416	1.86132	1.92251	0	0	0	14.6721	671.119	5.17714	0	0	0	0	0.375
541	23	720	18.5199	18.1021	32.2837	33.1416	2.4177	2.49719	0	0	0	4.68305	692.929	7.04023	0	0	0	0	0.375
542	23	780	19.0925	18.6784	34.343	35.2433	2.4177	2.49719	0	0	0	14.6721	670.709	7.88623	0	0	0	0	0.375
543	23	840	18.5071	18.102	36.4076	37.3451	2.31947	2.39572	0	0	0	28.1672	606.302	7.40678	0	0	0	0	0.375
544	23	900	16.8431	16.466	38.5123	39.4468	2.22123	2.29426	0	0	0	41.8358	507.811	5.70614	0	0	0	0	0.375
545	23	960	14.3568	14.0342	40.6888	41.5486	2.12299	2.19279	0	0	0	55.4483	372.916	3.08746	0	0	0	0	0.375
546	23	1020	11.445	11.1989	42.9437	43.6503	2.02475	2.09132	0	0	0	68.9017	227.822	0.00176322	0	0	0	0	0.375
547	23	1080	8.56613	8.41741	45.2929	45.7521	1.92652	1.98985	0	0	0	82.0889	74.0569	-3.02719	0	0	0	0	0.375
548	23	1140	7.06928	6.99946	47.6251	47.8538	1.82828	1.88839	0	0	0	90	0.137835	-4.5097	0	0	0	0	0.375
549	23	1200	6.40651	6.36964	49.8287	49.9556	1.73004	1.78692	0	0	0	90	0	-5.10159	0	0	0	0	0.375
550	23	1260	5.91749	5.89182	51.9649	52.0573	1.6318	1.68545	0	0	0	90	0	-5.52587	0	0	0	0	0.375
551	23	1320	5.54921	5.5293	54.0843	54.1591	1.53357	1.58398	0	0	0	90	0	-5.82369	0	0	0	0	0.375
552	23	1380	5.26718	5.25427	56.2103	56.2608	1.43533	1.48252	0	0	0	90	0	-6.02624	0	0	0	0	0.375
553	24	0	5.0571	5.04561	58.3158	58.3626	1.33709	1.38105	0	0	0	90	0	-6.15715	0	0	0	0	0.375
554	24	60	4.92809	4.92033	63.1453	63.1795	1.0823	1.11788	0	0	0	90	0	-6.06783	0	0	0	0	0.375
555	24	120	4.80127	4.79505	67.9668	67.9964	0.827503	0.854708	0	0	0	90	0	-5.99429	0	0	0	0	0.375
556	24	180	4.675	4.66977	72.7866	72.8133	0.572708	0.591537	0	0	0	90	0	-5.93452	0	0	0	0	0.375
557	24	240	4.54937	4.54449	77.6036	77.6302	0.25617	0.264592	0	0	0	90	0	-5.88689	0	0	0	0	0.375
558	24	300	4.42369	4.4192	83.6358	83.6621	0.19055	0.196814	0	0	0	90	0.122426	-5.79075	0	0	0	0	0.375
559	24	360	4.7848	4.72777	83.3292	83.6621	0.468581	0.483986	0	0	0	82.1806	72.1165	-5.42924	0	0	0	0	0.375
560	24	420	6.30753	6.13086	76.0426	76.9762	0.746612	0.771158	0	0	0	68.9793	224.4	-4.07934	0	0	0	0	0.375
561	24	480	8.69976	8.40481	66.8743	68.2248	1.02464	1.05833	0	0	0	55.5154	368.799	-1.83706	0	0	0	0	0.375
562	24	540	11.5633	11.1824	57.9906	59.4735	1.30267	1.3455	0	0	0	41.8965	503.628	0.929761	0	0	0	0	0.375
563	24	600	14.4481	14.0149	49.3181	50.7221	1.5807	1.63267	0	0	0	28.2289	602.73	3.68856	0	0	0	0	0.375
564	24	660	16.8947	16.4449	32.283	33.2194	1.85874	1.91984	0	0	0	14.759	669.9	5.17768	0	0	0	0	0.375
565	24	720	18.4972	18.08	32.3607	33.2194	2.4148	2.49419	0	0	0	4.9176	691.711	7.03895	0	0	0	0	0.375
566	24	780	19.0696	18.656	34.42	35.3212	2.4148	2.49419	0	0	0	14.759	669.489	7.88337	0	0	0	0	0.375
567	24	840	18.4845	18.08	36.4846	37.423	2.31668	2.39284	0	0	0	28.2289	605.078	7.40362	0	0	0	0	0.375
568	24	900	16.8215	16.4449	38.5895	39.5247	2.21856	2.2915	0	0	0	41.8965	506.578	5.704	0	0	0	0	0.375
569	24	960	14.337	14.0149	40.7663	41.6265	2.12044	2.19015	0	0	0	55.5154	371.687	3.08773	0	0	0	0	0.375
570	24	1020	11.4281	11.1823	43.0216	43.7283	2.02232	2.08881	0	0	0	68.9793	226.602	0.00586234	0	0	0	0	0.375
571	24	1080	8.55312	8.40481	45.3714	45.8301	1.9242	1.98746	0	0	0	82.1806	72.968	-3.01795	0	0	0	0	0.375
572	24	1140	7.06674	6.99691	47.7027	47.9319	1.82608	1.88612	0	0	0	90	0.12372	-4.48896	0	0	0	0	0.375
573	24	1200	6.40531	6.36821	49.9058	50.0336	1.72796	1.78477	0	0	0	90	0	-5.07983	0	0	0	0	0.375
574	24	1260	5.91706	5.89112	52.0418	52.1354	1.62984	1.68343	0	0	0	90	0	-5.50355	0	0	0	0	0.375
575	24	1320	5.54924	5.52907	54.1613	54.2372	1.53172	1.58208	0	0	0	90	0	-5.80115	0	0	0	0	0.375
576	24	1380	5.26757	5.25433	56.2871	56.339	1.4336	1.48074	0	0	0	90	0	-6.00371	0	0	0	0	0.375
577	25	0	5.05759	5.04584	58.3929	58.4407	1.33548	1.37939	0	0	0	90	0	-6.13476	0	0	0	0	0.375
578	25	60	4.92874	4.92065	63.2173	63.253	1.08127	1.11681	0	0	0	90	0	-6.04644	0	0	0	0	0.375
579	25	120	4.80205	4.79546	68.0338	68.0652	0.827048	0.854238	0	0	0	90	0	-5.97377	0	0	0	0	0.375
580	25	180	4.67593	4.67027	72.8485	72.8774	0.572829	0.591662	0	0	0	90	0	-5.91479	0	0	0	0	0.375
581	25	240	4.5505	4.54508	77.6601	77.6896	0.255888	0.2643	0	0	0	90	0	-5.86787	0	0	0	0	0.375
582	25	300	4.42494	4.41989	83.6982	83.7278	0.18893	0.195141	0	0	0	90	0.109623	-5.77529	0	0	0	0	0.375
583	25	360	4.78014	4.72346	83.3967	83.7278	0.466831	0.482178	0	0	0	82.2747	71.0332	-5.41944	0	0	0	0	0.375
584	25	420	6.29682	6.12113	76.1498	77.0795	0.744732	0.769216	0	0	0	69.0592	223.212	-4.07429	0	0	0	0	0.375
585	25	480	8.68452	8.39058	66.973	68.321	1.02263	1.05625	0	0	0	55.5847	367.632	-1.83707	0	0	0	0	0.375
586	25	540	11.5449	11.1648	58.0806	59.5624	1.30053	1.34329	0	0	0	41.9597	502.487	0.926062	0	0	0	0	0.375
587	25	600	14.4276	13.9952	49.4	50.8039	1.57843	1.63033	0	0	0	28.2939	601.622	3.68278	0	0	0	0	0.375
588	25	660	16.8732	16.424	32.3496	33.2867	1.85633	1.91736	0	0	0	14.8512	668.815	5.17389	0	0	0	0	0.375
589	25	720	18.4752	18.0586	32.4273	33.2867	2.41214	2.49144	0	0	0	5.15809	690.633	7.03394	0	0	0	0	0.375
590	25	780	19.0475	18.6344	34.4865	35.3885	2.41214	2.49144	0	0	0	14.8512	668.404	7.87716	0	0	0	0	0.375
591	25	840	18.4626	18.0586	36.5511	37.4902	2.31412	2.3902	0	0	0	28.2939	603.973	7.39704	0	0	0	0	0.375
592	25	900	16.8002	16.424	38.656	39.5919	2.21611	2.28897	0	0	0	41.9597	505.44	5.69799	0	0	0	0	0.375
593	25	960	14.3169	13.9952	40.833	41.6936	2.1181	2.18774	0	0	0	55.5847	370.521	3.08336	0	0	0	0	0.375
594	25	1020	11.4101	11.1648	43.0887	43.7953	2.02009	2.0865	0	0	0	69.0592	225.41	0.00442077	0	0	0	0	0.375
595	25	1080	8.53845	8.39057	45.4389	45.897	1.92208	1.98527	0	0	0	82.2747	71.8747	-3.01512	0	0	0	0	0.375
596	25	1140	7.06239	6.99259	47.7694	47.9987	1.82407	1.88404	0	0	0	90	0.110784	-4.47481	0	0	0	0	0.375
597	25	1200	6.40221	6.36491	49.9717	50.1004	1.72606	1.7828	0	0	0	90	0	-5.06473	0	0	0	0	0.375
598	25	1260	5.91465	5.88848	52.1076	52.2021	1.62805	1.68157	0	0	0	90	0	-5.48796	0	0	0	0	0.375
599	25	1320	5.54722	5.52684	54.227	54.3039	1.53003	1.58034	0	0	0	90	0	-5.78536	0	0	0	0	0.375
600	25	1380	5.26587	5.25233	56.3524	56.4056	1.43202	1.4791	0	0	0	90	0	-5.98791	0	0	0	0	0.375
601	26	0	5.05596	5.04397	58.4584	58.5073	1.33401	1.37787	0	0	0	90	0	-6.1191	0	0	0	0	0.375
602	26	60	4.92723	4.91885	63.2775	63.3145	1.08035	1.11587	0	0	0	90	0	-6.03164	0	0	0	0	0.375
603	26	120	4.80065	4.79373	68.0888	68.1218	0.82669	0.853868	0	0	0	90	0	-5.95975	0	0	0	0	0.375
604	26	180	4.67464	4.6686	72.8982	72.929	0.573029	0.591868	0	0	0	90	0	-5.90145	0	0	0	0	0.375
605	26	240	4.54938	4.54348	77.7042	77.7363	0.25563	0.264034	0	0	0	90	0	-5.85515	0	0	0	0	0.375
606	26	300	4.42392	4.41836	83.7489	83.7815	0.1873	0.193458	0	0	0	90	0.097929	-5.76593	0	0	0	0	0.375
607	26	360	4.77322	4.71694	83.4525	83.7815	0.4651	0.480391	0	0	0	82.3713	69.9458	-5.41572	0	0	0	0	0.375
608	26	420	6.28408	6.1094	76.2463	77.172	0.742901	0.767324	0	0	0	69.1414	222.051	-4.07507	0	0	0	0	0.375
609	26	480	8.66774	8.37479	67.061	68.4064	1.0207	1.05426	0	0	0	55.6564	366.527	-1.84242	0	0	0	0	0.375
610	26	540	11.5255	11.1463	58.1601	59.6408	1.2985	1.34119	0	0	0	42.0256	501.44	0.917682	0	0	0	0	0.375
611	26	600	14.4068	13.9752	49.4717	50.8753	1.5763	1.62812	0	0	0	28.3623	600.63	3.67296	0	0	0	0	0.375
612	26	660	16.8519	16.4034	32.4065	33.3441	1.8541	1.91506	0	0	0	14.9491	667.861	5.16587	0	0	0	0	0.375
613	26	720	18.4539	18.0377	32.4841	33.3441	2.4097	2.48892	0	0	0	5.4044	689.691	7.02528	0	0	0	0	0.375
614	26	780	19.0261	18.6136	34.5432	35.4457	2.4097	2.48892	0	0	0	14.9491	667.45	7.86766	0	0	0	0	0.375
615	26	840	18.4413	18.0377	36.6077	37.5472	2.31179	2.38779	0	0	0	28.3623	602.985	7.38712	0	0	0	0	0.375
616	26	900	16.7791	16.4034	38.7125	39.6488	2.21388	2.28666	0	0	0	42.0256	504.395	5.68817	0	0	0	0	0.375
617	26	960	14.2964	13.9752	40.8896	41.7504	2.11596	2.18553	0	0	0	55.6564	369.415	3.07447	0	0	0	0	0.375
618	26	1020	11.3911	11.1463	43.1456	43.8519	2.01805	2.0844	0	0	0	69.1414	224.244	-0.00241069	0	0	0	0	0.375
619	26	1080	8.5222	8.37478	45.4962	45.9535	1.92014	1.98327	0	0	0	82.3713	70.7768	-3.01849	0	0	0	0	0.375
620	26	1140	7.05634	6.9866	47.8256	48.055	1.82223	1.88214	0	0	0	90	0.0989679	-4.46704	0	0	0	0	0.375
621	26	1200	6.39731	6.35985	50.0271	50.1566	1.72432	1.781	0	0	0	90	0	-5.05609	0	0	0	0	0.375
622	26	1260	5.91038	5.88399	52.1627	52.2581	1.6264	1.67987	0	0	0	90	0	-5.47886	0	0	0	0	0.375
623	26	1320	5.54328	5.5227	54.282	54.3597	1.52849	1.57874	0	0	0	90	0	-5.77608	0	0	0	0	0.375
624	26	1380	5.26219	5.24839	56.407	56.4613	1.43058	1.47761	0	0	0	90	0	-5.97863	0	0	0	0	0.375
625	27	0	5.05231	5.04012	58.5131	58.5628	1.33267	1.37648	0	0	0	90	0	-6.10994	0	0	0	0	0.375
626	27	60	4.92368	4.91505	63.3267	63.3648	1.07954	1.11504	0	0	0	90	0	-6.02322	0	0	0	0	0.375
627	27	120	4.79718	4.78997	68.1325	68.1669	0.826423	0.853593	0	0	0	90	0	-5.95199	0	0	0	0	0.375
628	27	180	4.67127	4.6649	72.9364	72.9689	0.573301	0.59215	0	0	0	90	0	-5.89428	0	0	0	0	0.375
629	27	240	4.54614	4.53982	77.7365	77.7709	0.255394	0.26379	0	0	0	90	0	-5.84851	0	0	0	0	0.375
630	27	300	4.42075	4.41474	83.7886	83.8239	0.185659	0.191762	0	0	0	90	0.0872828	-5.76247	0	0	0	0	0.375
631	27	360	4.76416	4.70833	83.4974	83.8239	0.463386	0.478621	0	0	0	82.4702	68.8541	-5.41785	0	0	0	0	0.375
632	27	420	6.26944	6.09578	76.3327	77.2541	0.741114	0.765479	0	0	0	69.2259	220.917	-4.08147	0	0	0	0	0.375
633	27	480	8.6495	8.35752	67.1391	68.4817	1.01884	1.05234	0	0	0	55.7305	365.482	-1.85293	0	0	0	0	0.375
634	27	540	11.5053	11.1269	58.2298	59.7093	1.29657	1.3392	0	0	0	42.0941	500.484	0.904752	0	0	0	0	0.375
635	27	600	14.3857	13.9548	49.5338	50.9369	1.5743	1.62605	0	0	0	28.4342	599.753	3.65918	0	0	0	0	0.375
636	27	660	16.8309	16.3829	32.4541	33.3921	1.85202	1.91291	0	0	0	15.0526	667.035	5.15371	0	0	0	0	0.375
637	27	720	18.4331	18.0174	32.5316	33.3921	2.40748	2.48663	0	0	0	5.65643	688.883	7.01303	0	0	0	0	0.375
638	27	780	19.0055	18.5933	34.5905	35.4934	2.40748	2.48663	0	0	0	15.0526	666.625	7.85493	0	0	0	0	0.375
639	27	840	18.4205	18.0174	36.6548	37.5948	2.30966	2.38559	0	0	0	28.4342	602.109	7.37391	0	0	0	0	0.375
640	27	900	16.7582	16.3829	38.7595	39.6961	2.21183	2.28455	0	0	0	42.0941	503.441	5.67464	0	0	0	0	0.375
641	27	960	14.2756	13.9548	40.9367	41.7974	2.11401	2.18351	0	0	0	55.7305	368.368	3.06116	0	0	0	0	0.375
642	27	1020	11.3712	11.1269	43.1929	43.8987	2.01619	2.08248	0	0	0	69.2259	223.104	-0.0144859	0	0	0	0	0.375
643	27	1080	8.50444	8.35751	45.5437	46	1.91837	1.98144	0	0	0	82.4702	69.674	-3.0279	0	0	0	0	0.375
644	27	1140	7.04869	6.97904	47.872	48.1014	1.82055	1.8804	0	0	0	90	0.0882098	-4.46544	0	0	0	0	0.375
645	27	1200	6.39072	6.35312	50.0726	50.2027	1.72272	1.77936	0	0	0	90	0	-5.0537	0	0	0	0	0.375
646	27	1260	5.90433	5.87777	52.2079	52.304	1.6249	1.67832	0	0	0	90	0	-5.47605	0	0	0	0	0.375
647	27	1320	5.53752	5.51678	54.327	54.4053	1.52708	1.57729	0	0	0	90	0	-5.7731	0	0	0	0	0.375
648	27	1380	5.25665	5.24262	56.4515	56.5067	1.42926	1.47625	0	0	0	90	0	-5.97565	0	0	0	0	0.375
649	28	0	5.04678	5.03441	58.5575	58.608	1.33144	1.37521	0	0	0	90	0	-6.10706	0	0	0	0	0.375
650	28	60	4.91822	4.90936	63.3654	63.4045	1.07884	1.11431	0	0	0	90	0	-6.02097	0	0	0	0	0.375
651	28	120	4.79178	4.78431	68.1655	68.2011	0.826241	0.853405	0	0	0	90	0	-5.95028	0	0	0	0	0.375
652	28	180	4.66593	4.65927	72.9636	72.9976	0.573643	0.592502	0	0	0	90	0	-5.89307	0	0	0	0	0.375
653	28	240	4.5409	4.53422	77.7578	77.7942	0.255178	0.263568	0	0	0	90	0	-5.84774	0	0	0	0	0.375
654	28	300	4.41556	4.40917	83.8181	83.8556	0.184005	0.190055	0	0	0	90	0.0776203	-5.76469	0	0	0	0	0.375
655	28	360	4.75449	4.69775	83.5236	83.8556	0.461685	0.476864	0	0	0	82.5715	69.4324	-5.42564	0	0	0	0	0.375
656	28	420	6.25389	6.08037	76.4051	77.3267	0.739366	0.763673	0	0	0	69.3127	219.808	-4.09331	0	0	0	0	0.375
657	28	480	8.63009	8.33885	67.2069	68.5476	1.01705	1.05048	0	0	0	55.8069	364.495	-1.86846	0	0	0	0	0.375
658	28	540	11.4845	11.1065	58.2889	59.7685	1.29473	1.33729	0	0	0	42.1653	499.618	0.887399	0	0	0	0	0.375
659	28	600	14.3639	13.9341	49.5881	50.9894	1.57241	1.6241	0	0	0	28.5096	598.988	3.64155	0	0	0	0	0.375
660	28	660	16.8108	16.3626	32.4914	33.4312	1.85009	1.91091	0	0	0	15.162	666.335	5.1375	0	0	0	0	0.375
661	28	720	18.4144	17.9976	32.5672	33.4312	2.40545	2.48453	0	0	0	5.91408	688.205	6.99726	0	0	0	0	0.375
662	28	780	18.9845	18.5738	34.6313	35.5322	2.40545	2.48453	0	0	0	15.162	665.925	7.83902	0	0	0	0	0.375
663	28	840	18.3994	17.9976	36.6953	37.6333	2.30771	2.38358	0	0	0	28.5096	601.345	7.35747	0	0	0	0	0.375
664	28	900	16.7372	16.3625	38.7982	39.7343	2.20997	2.28262	0	0	0	42.1653	502.574	5.65747	0	0	0	0	0.375
665	28	960	14.2546	13.9341	40.9747	41.8353	2.11223	2.18167	0	0	0	55.8069	367.378	3.04353	0	0	0	0	0.375
666	28	1020	11.3504	11.1065	43.231	43.9363	2.01449	2.08072	0	0	0	69.3127	221.988	-0.0316629	0	0	0	0	0.375
667	28	1080	8.48606	8.33885	45.5797	46.0373	1.91675	1.97977	0	0	0	82.5715	70.2607	-3.04315	0	0	0	0	0.375
668	28	1140	7.03993	6.97	47.9079	48.1383	1.81901	1.87881	0	0	0	90	0.0784452	-4.46982	0	0	0	0	0.375
669	28	1200	6.38264	6.34483	50.1085	50.2394	1.72127	1.77786	0	0	0	90	0	-5.05735	0	0	0	0	0.375
670	28	1260	5.89669	5.86993	52.2435	52.3404	1.62353	1.67691	0	0	0	90	0	-5.47932	0	0	0	0	0.375
671	28	1320	5.53009	5.50918	54.3623	54.4414	1.52579	1.57595	0	0	0	90	0	-5.77622	0	0	0	0	0.375
672	28	1380	5.2494	5.23513	56.4863	56.5424	1.42805	1.475	0	0	0	90	0	-5.97876	0	0	0	0	0.375
673	29	0	5.03949	5.02696	58.5922	58.6434	1.33031	1.37405	0	0	0	90	0	-6.11025	0	0	0	0	0.375
674	29	60	4.91098	4.90192	63.3941	63.4343	1.07822	1.11367	0	0	0	90	0	-6.02466	0	0	0	0	0.375
675	29	120	4.78457	4.77687	68.1885	68.2251	0.826137	0.853297	0	0	0	90	0	-5.95442	0	0	0	0	0.375
676	29	180	4.65877	4.65183	72.9806	73.016	0.574049	0.592922	0	0	0	90	0	-5.8976	0	0	0	0	0.375
677	29	240	4.53382	4.52679	77.7686	77.8069	0.254981	0.263364	0	0	0	90	0	-5.85262	0	0	0	0	0.375
678	29	300	4.4085	4.40175	83.8378	83.8775	0.182338	0.188333	0	0	0	90	0.0688771	-5.77239	0	0	0	0	0.375
679	29	360	4.74154	4.68533	83.5484	83.8775	0.459995	0.475118	0	0	0	82.675	68.3308	-5.43888	0	0	0	0	0.375
680	29	420	6.23577	6.06328	76.4733	77.3904	0.737652	0.761903	0	0	0	69.4017	218.723	-4.1104	0	0	0	0	0.375
681	29	480	8.60918	8.31887	67.2669	68.6047	1.01531	1.04869	0	0	0	55.8857	363.564	-1.88883	0	0	0	0	0.375
682	29	540	11.4627	11.0854	58.3407	59.819	1.29297	1.33547	0	0	0	42.2393	498.838	0.865749	0	0	0	0	0.375
683	29	600	14.3423	13.9131	49.6325	51.0334	1.57062	1.62226	0	0	0	28.5886	598.332	3.62016	0	0	0	0	0.375
684	29	660	16.7902	16.3424	32.5221	33.462	1.84828	1.90904	0	0	0	15.2773	665.758	5.11731	0	0	0	0	0.375
685	29	720	18.3947	17.9783	32.5979	33.462	2.40359	2.48261	0	0	0	6.17723	687.655	6.97803	0	0	0	0	0.375
686	29	780	18.9652	18.5548	34.6615	35.5627	2.40359	2.48261	0	0	0	15.2773	665.348	7.81997	0	0	0	0	0.375
687	29	840	18.3798	17.9783	36.7251	37.6633	2.30593	2.38174	0	0	0	28.5886	600.689	7.33785	0	0	0	0	0.375
688	29	900	16.7167	16.3424	38.8279	39.764	2.20826	2.28086	0	0	0	42.2393	501.794	5.63673	0	0	0	0	0.375
689	29	960	14.2332	13.9131	41.0043	41.8646	2.1106	2.17999	0	0	0	55.8857	366.444	3.0217	0	0	0	0	0.375
690	29	1020	11.3288	11.0854	43.2607	43.9652	2.01294	2.07911	0	0	0	69.4017	220.895	-0.0538034	0	0	0	0	0.375
691	29	1080	8.46554	8.31886	45.6096	46.0659	1.91527	1.97824	0	0	0	82.675	69.147	-3.06408	0	0	0	0	0.375
692	29	1140	7.02936	6.95958	47.9364	48.1665	1.81761	1.87736	0	0	0	90	0.069609	-4.47999	0	0	0	0	0.375
693	29	1200	6.37298	6.33509	50.1359	50.2672	1.71994	1.77649	0	0	0	90	0	-5.06685	0	0	0	0	0.375
694	29	1260	5.88746	5.86057	52.2704	52.3678	1.62228	1.67561	0	0	0	90	0	-5.48846	0	0	0	0	0.375
695	29	1320	5.52105	5.50001	54.3889	54.4685	1.52461	1.57474	0	0	0	90	0	-5.78521	0	0	0	0	0.375
696	29	1380	5.24049	5.22604	56.5123	56.5691	1.42695	1.47386	0	0	0	90	0	-5.98774	0	0	0	0	0.375
697	30	0	5.03052	5.01787	58.618	58.6698	1.32929	1.37299	0	0	0	90	0	-6.11929	0	0	0	0	0.375
698	30	60	4.90205	4.89282	63.4139	63.4547	1.0777	1.11313	0	0	0	90	0	-6.03409	0	0	0	0	0.375
699	30	120	4.77565	4.76777	68.2021	68.2397	0.826105	0.853265	0	0	0	90	0	-5.96419	0	0	0	0	0.375
700	30	180	4.64986	4.64272	72.9882	73.0247	0.574514	0.593402	0	0	0	90	0	-5.90767	0	0	0	0	0.375
701	30	240	4.52496	4.51767	77.7699	77.8096	0.254801	0.263178	0	0	0	90	0	-5.86296	0	0	0	0	0.375
702	30	300	4.39966	4.39262	83.8488	83.8902	0.180658	0.186597	0	0	0	90	0.0609888	-5.78535	0	0	0	0	0.375
703	30	360	4.72681	4.67118	83.5645	83.8902	0.458312	0.47338	0	0	0	82.7808	67.2245	-5.45737	0	0	0	0	0.375
704	30	420	6.21605	6.04462	76.5336	77.4458	0.735967	0.760163	0	0	0	69.4929	217.662	-4.13256	0	0	0	0	0.375
705	30	480	8.58705	8.29765	67.3188	68.6537	1.01362	1.04695	0	0	0	55.9669	362.688	-1.9139	0	0	0	0	0.375
706	30	540	11.4401	11.0635	58.3845	59.8615	1.29128	1.33373	0	0	0	42.316	498.143	0.839921	0	0	0	0	0.375
707	30	600	14.3205	13.8919	49.6691	51.0694	1.56893	1.62051	0	0	0	28.6713	597.781	3.5951	0	0	0	0	0.375
708	30	660	16.7699	16.3224	32.545	33.485	1.84658	1.90729	0	0	0	15.3986	665.3	5.09324	0	0	0	0	0.375
709	30	720	18.3755	17.9594	32.621	33.485	2.40189	2.48086	0	0	0	6.44578	687.229	6.95541	0	0	0	0	0.375
710	30	780	18.9465	18.5364	34.6839	35.5852	2.40189	2.48086	0	0	0	15.3986	664.89	7.79784	0	0	0	0	0.375
711	30	840	18.3606	17.9594	36.7472	37.6855	2.3043	2.38006	0	0	0	28.6713	600.138	7.3151	0	0	0	0	0.375
712	30	900	16.6964	16.3224	38.8497	39.7857	2.2067	2.27925	0	0	0	42.316	501.097	5.6125	0	0	0	0	0.375
713	30	960	14.2116	13.8919	41.0259	41.8859	2.10911	2.17845	0	0	0	55.9669	365.564	2.99575	0	0	0	0	0.375
714	30	1020	11.3064	11.0635	43.2825	43.9861	2.01151	2.07764	0	0	0	69.4929	219.824	-0.0807722	0	0	0	0	0.375
715	30	1080	8.44376	8.29764	45.6314	46.0863	1.91392	1.97684	0	0	0	82.7808	68.028	-3.09051	0	0	0	0	0.375
716	30	1140	7.01748	6.94787	47.9568	48.1865	1.81632	1.87604	0	0	0	90	0.0616365	-4.49575	0	0	0	0	0.375
717	30	1200	6.36194	6.32398	50.1552	50.2868	1.71873	1.77523	0	0	0	90	0	-5.08199	0	0	0	0	0.375
718	30	1260	5.87678	5.8498	52.2891	52.387	1.62113	1.67443	0	0	0	90	0	-5.50327	0	0	0	0	0.375
719	30	1320	5.51052	5.4894	54.4073	54.4872	1.52354	1.57363	0	0	0	90	0	-5.79988	0	0	0	0	0.375
720	30	1380	5.23006	5.21547	56.53	56.5874	1.42594	1.47282	0	0	0	90	0	-6.00239	0	0	0	0	0.375
721	31	0	5.02002	5.00727	58.6355	58.6876	1.32835	1.37202	0	0	0	90	0	-6.13398	0	0	0	0	0.375
722	31	60	4.89156	4.8822	63.4251	63.4665	1.07724	1.11266	0	0	0	90	0	-6.04905	0	0	0	0	0.375
723	31	120	4.76515	4.75712	68.2071	68.2454	0.826139	0.853299	0	0	0	90	0	-5.97939	0	0	0	0	0.375
724	31	180	4.63936	4.63205	72.9869	73.0243	0.575035	0.59394	0	0	0	90	0	-5.92307	0	0	0	0	0.375
725	31	240	4.51448	4.50697	77.7623	77.8032	0.254636	0.263007	0	0	0	90	0	-5.87854	0	0	0	0	0.375
726	31	300	4.38916	4.38189	83.8517	83.8945	0.178962	0.184846	0	0	0	90	0.053892	-5.80339	0	0	0	0	0.375
727	31	360	4.71043	4.65543	83.5724	83.8945	0.456634	0.471646	0	0	0	82.8889	66.1132	-5.48092	0	0	0	0	0.375
728	31	420	6.19485	6.0245	76.5865	77.4937	0.734306	0.758447	0	0	0	69.5864	216.621	-4.1596	0	0	0	0	0.375
729	31	480	8.56377	8.27527	67.3633	68.6952	1.01198	1.04525	0	0	0	56.0505	361.865	-1.94351	0	0	0	0	0.375
730	31	540	11.4168	11.0408	58.4209	59.8966	1.28965	1.33205	0	0	0	42.3955	497.53	0.810038	0	0	0	0	0.375
731	31	600	14.2985	13.8703	49.6984	51.098	1.56732	1.61885	0	0	0	28.7578	597.334	3.56645	0	0	0	0	0.375
732	31	660	16.7497	16.3025	32.5609	33.5008	1.84499	1.90565	0	0	0	15.5261	664.958	5.06536	0	0	0	0	0.375
733	31	720	18.3567	17.941	32.6369	33.5008	2.40034	2.47925	0	0	0	6.71963	686.924	6.92943	0	0	0	0	0.375
734	31	780	18.9284	18.5185	34.6992	35.6005	2.40034	2.47925	0	0	0	15.5261	664.549	7.77266	0	0	0	0	0.375
735	31	840	18.342	17.941	36.762	37.7003	2.3028	2.37851	0	0	0	28.7578	599.69	7.28927	0	0	0	0	0.375
736	31	900	16.6763	16.3025	38.8642	39.8	2.20527	2.27777	0	0	0	42.3955	500.481	5.58482	0	0	0	0	0.375
737	31	960	14.1897	13.8703	41.0403	41.8997	2.10774	2.17703	0	0	0	56.0505	364.735	2.9658	0	0	0	0	0.375
738	31	1020	11.2833	11.0408	43.2968	43.9995	2.01021	2.0763	0	0	0	69.5864	218.774	-0.112437	0	0	0	0	0.375
739	31	1080	8.4208	8.27526	45.6459	46.0992	1.91268	1.97556	0	0	0	82.8889	66.9036	-3.12228	0	0	0	0	0.375
740	31	1140	7.00437	6.93497	47.9698	48.199	1.81514	1.87482	0	0	0	90	0.0544638	-4.51692	0	0	0	0	0.375
741	31	1200	6.34962	6.31163	50.167	50.2987	1.71761	1.77408	0	0	0	90	0	-5.10258	0	0	0	0	0.375
742	31	1260	5.86478	5.83773	52.3003	52.3984	1.62008	1.67334	0	0	0	90	0	-5.52355	0	0	0	0	0.375
743	31	1320	5.49863	5.47744	54.418	54.4982	1.52255	1.57261	0	0	0	90	0	-5.82002	0	0	0	0	0.375
744	31	1380	5.21823	5.20353	56.54	56.5979	1.42502	1.47187	0	0	0	90	0	-6.0225	0	0	0	0	0.375
745	32	0	5.0081	4.99528	58.6452	58.6976	1.32749	1.37113	0	0	0	90	0	-6.15412	0	0	0	0	0.375
746	32	60	4.87962	4.87017	63.4284	63.4703	1.07686	1.11226	0	0	0	90	0	-6.06934	0	0	0	0	0.375
747	32	120	4.75319	4.74505	68.2041	68.2429	0.826232	0.853396	0	0	0	90	0	-5.99981	0	0	0	0	0.375
748	32	180	4.62738	4.61993	72.9776	73.0156	0.575605	0.594529	0	0	0	90	0	-5.9436	0	0	0	0	0.375
749	32	240	4.50249	4.49482	77.7464	77.7882	0.254484	0.26285	0	0	0	90	0	-5.89917	0	0	0	0	0.375
750	32	300	4.37715	4.3697	83.8472	83.891	0.177251	0.183079	0	0	0	90	0.047525	-5.8263	0	0	0	0	0.375
751	32	360	4.69252	4.6382	83.5728	83.891	0.454957	0.469915	0	0	0	82.9991	64.9961	-5.50933	0	0	0	0	0.375
752	32	420	6.17225	6.00301	76.6327	77.5347	0.732663	0.756751	0	0	0	69.6821	215.585	-4.19135	0	0	0	0	0.375
753	32	480	8.5394	8.25181	67.4012	68.7298	1.01037	1.04359	0	0	0	56.1365	361.046	-1.97751	0	0	0	0	0.375
754	32	540	11.3928	11.0175	58.4507	59.9248	1.28808	1.33042	0	0	0	42.4779	496.919	0.776215	0	0	0	0	0.375
755	32	600	14.2761	13.8486	49.7211	51.1198	1.56578	1.61726	0	0	0	28.8481	596.885	3.53431	0	0	0	0	0.375
756	32	660	16.7297	16.2828	32.5703	33.5099	1.84349	1.90409	0	0	0	15.6597	664.61	5.03374	0	0	0	0	0.375
757	32	720	18.3383	17.9229	32.6464	33.5099	2.3989	2.47777	0	0	0	6.99865	686.613	6.90016	0	0	0	0	0.375
758	32	780	18.9107	18.5011	34.708	35.6091	2.3989	2.47777	0	0	0	15.6597	664.202	7.74448	0	0	0	0	0.375
759	32	840	18.3237	17.9229	36.7703	37.7083	2.30143	2.37709	0	0	0	28.8481	599.239	7.2604	0	0	0	0	0.375
760	32	900	16.6563	16.2828	38.8721	39.8075	2.20395	2.27641	0	0	0	42.4779	499.865	5.55377	0	0	0	0	0.375
761	32	960	14.1675	13.8485	41.0479	41.9067	2.10648	2.17573	0	0	0	56.1365	363.908	2.93191	0	0	0	0	0.375
762	32	1020	11.2595	11.0175	43.3045	44.0059	2.00901	2.07505	0	0	0	69.6821	217.726	-0.148668	0	0	0	0	0.375
763	32	1080	8.39674	8.2518	45.6536	46.1052	1.91153	1.97438	0	0	0	82.9991	65.7729	-3.15922	0	0	0	0	0.375
764	32	1140	6.99013	6.92097	47.976	48.2044	1.81406	1.8737	0	0	0	90	0.0480285	-4.54331	0	0	0	0	0.375
765	32	1200	6.33611	6.29812	50.1718	50.3036	1.71659	1.77302	0	0	0	90	0	-5.12843	0	0	0	0	0.375
766	32	1260	5.85155	5.82446	52.3045	52.4028	1.61911	1.67234	0	0	0	90	0	-5.54911	0	0	0	0	0.375
767	32	1320	5.48547	5.46425	54.4217	54.502	1.52164	1.57166	0	0	0	90	0	-5.84545	0	0	0	0	0.375
768	32	1380	5.20511	5.19032	56.543	56.6012	1.42416	1.47099	0	0	0	90	0	-6.04787	0	0	0	0	0.375
769	33	0	4.99486	4.98201	58.6478	58.7004	1.32669	1.37031	0	0	0	90	0	-6.17949	0	0	0	0	0.375
770	33	60	4.86636	4.85684	63.4245	63.4667	1.07653	1.11193	0	0	0	90	0	-6.09476	0	0	0	0	0.375
771	33	120	4.73989	4.73167	68.1938	68.233	0.826378	0.853547	0	0	0	90	0	-6.02526	0	0	0	0	0.375
772	33	180	4.61404	4.6065	72.9608	72.9992	0.576222	0.595166	0	0	0	90	0	-5.96907	0	0	0	0	0.375
773	33	240	4.48913	4.48133	77.7231	77.7655	0.254342	0.262704	0	0	0	90	0	-5.92465	0	0	0	0	0.375
774	33	300	4.36374	4.35617	83.836	83.8805	0.175524	0.181295	0	0	0	90	0.0418281	-5.85389	0	0	0	0	0.375
775	33	360	4.67321	4.61962	83.5666	83.8805	0.45328	0.468182	0	0	0	83.1115	63.874	-5.5424	0	0	0	0	0.375
776	33	420	6.14839	5.98026	76.6729	77.5695	0.731035	0.755069	0	0	0	69.7799	214.584	-4.22763	0	0	0	0	0.375
777	33	480	8.51408	8.22735	67.4328	68.7582	1.00879	1.04196	0	0	0	56.2248	360.323	-2.01575	0	0	0	0	0.375
778	33	540	11.3677	10.9935	58.4764	59.9469	1.28655	1.32884	0	0	0	42.5632	495.057	0.738571	0	0	0	0	0.375
779	33	600	14.2528	13.8265	49.7404	51.1355	1.5643	1.61573	0	0	0	28.9423	596.636	3.49875	0	0	0	0	0.375
780	33	660	16.7105	16.2632	32.5721	33.5128	1.84206	1.90262	0	0	0	15.7995	664.492	4.99845	0	0	0	0	0.375
781	33	720	18.3208	17.9052	32.6487	33.5128	2.39757	2.47639	0	0	0	7.28274	686.54	6.86764	0	0	0	0	0.375
782	33	780	18.9	18.4841	34.6966	35.6115	2.39757	2.47639	0	0	0	15.7995	664.084	7.71333	0	0	0	0	0.375
783	33	840	18.3094	17.9052	36.7641	37.7101	2.30015	2.37577	0	0	0	28.9423	598.987	7.22853	0	0	0	0	0.375
784	33	900	16.6373	16.2632	38.8716	39.8088	2.20273	2.27515	0	0	0	42.5632	497.99	5.51942	0	0	0	0	0.375
785	33	960	14.1452	13.8265	41.0494	41.9074	2.10531	2.17453	0	0	0	56.2248	363.177	2.8942	0	0	0	0	0.375
786	33	1020	11.2349	10.9935	43.3061	44.0061	2.00789	2.0739	0	0	0	69.7799	216.714	-0.189337	0	0	0	0	0.375
787	33	1080	8.37162	8.22735	45.6551	46.1047	1.91047	1.97328	0	0	0	83.1115	64.6369	-3.20117	0	0	0	0	0.375
788	33	1140	6.97485	6.90597	47.9759	48.2034	1.81305	1.87266	0	0	0	90	0.0422703	-4.57474	0	0	0	0	0.375
789	33	1200	6.32153	6.28356	50.1704	50.302	1.71563	1.77204	0	0	0	90	0	-5.15935	0	0	0	0	0.375
790	33	1260	5.83721	5.8101	52.3024	52.4007	1.61821	1.67141	0	0	0	90	0	-5.57975	0	0	0	0	0.375
791	33	1320	5.47118	5.44994	54.419	54.4994	1.52079	1.57079	0	0	0	90	0	-5.87595	0	0	0	0	0.375
792	33	1380	5.19081	5.17598	56.5396	56.598	1.42337	1.47017	0	0	0	90	0	-6.07831	0	0	0	0	0.375
793	34	0	4.98045	4.96758	58.644	58.6967	1.32596	1.36955	0	0	0	90	0	-6.2099	0	0	0	0	0.375
794	34	60	4.8519	4.84234	63.4141	63.4564	1.07626	1.11165	0	0	0	90	0	-6.12511	0	0	0	0	0.375
795	34	120	4.72537	4.71711	68.1768	68.2162	0.826571	0.853746	0	0	0	90	0	-6.05554	0	0	0	0	0.375
796	34	180	4.59946	4.59188	72.9372	72.9759	0.576879	0.595844	0	0	0	90	0	-5.99928	0	0	0	0	0.375
797	34	240	4.4745	4.46664	77.6929	77.7357	0.25421	0.262568	0	0	0	90	0	-5.95478	0	0	0	0	0.375
798	34	300	4.34905	4.34141	83.8188	83.8637	0.17378	0.179493	0	0	0	90	0.0367439	-5.88596	0	0	0	0	0.375
799	34	360	4.65262	4.59979	83.5544	83.8637	0.451598	0.466445	0	0	0	83.2259	62.7463	-5.57995	0	0	0	0	0.375
800	34	420	6.12336	5.95637	76.7077	77.5988	0.729416	0.753397	0	0	0	69.88	213.602	-4.26826	0	0	0	0	0.375
801	34	480	8.48785	8.20198	67.4589	68.7811	1.00723	1.04035	0	0	0	56.3156	359.647	-2.05809	0	0	0	0	0.375
802	34	540	11.3426	10.969	58.4943	59.9633	1.28505	1.3273	0	0	0	42.6514	494.674	0.69722	0	0	0	0	0.375
803	34	600	14.2302	13.8043	49.7512	51.1456	1.56287	1.61425	0	0	0	29.0405	596.482	3.45986	0	0	0	0	0.375
804	34	660	16.6908	16.2437	32.5697	33.5101	1.84069	1.9012	0	0	0	15.9457	664.48	4.95955	0	0	0	0	0.375
805	34	720	18.3033	17.8879	32.6464	33.5101	2.39633	2.47511	0	0	0	7.57178	686.575	6.83192	0	0	0	0	0.375
806	34	780	18.8834	18.4676	34.6936	35.6082	2.39633	2.47511	0	0	0	15.9457	664.074	7.67925	0	0	0	0	0.375
807	34	840	18.2919	17.8879	36.7606	37.7063	2.29896	2.37454	0	0	0	29.0405	598.829	7.19371	0	0	0	0	0.375
808	34	900	16.6176	16.2437	38.8676	39.8043	2.20159	2.27397	0	0	0	42.6514	497.602	5.48181	0	0	0	0	0.375
809	34	960	14.1226	13.8043	41.0451	41.9024	2.10422	2.1734	0	0	0	56.3156	362.492	2.85276	0	0	0	0	0.375
810	34	1020	11.2099	10.969	43.3018	44.0005	2.00685	2.07283	0	0	0	69.88	215.719	-0.234318	0	0	0	0	0.375
811	34	1080	8.34561	8.20198	45.6509	46.0985	1.90948	1.97226	0	0	0	83.2259	63.4947	-3.24796	0	0	0	0	0.375
812	34	1140	6.95867	6.89006	47.97	48.1966	1.81211	1.87169	0	0	0	90	0.0371313	-4.61103	0	0	0	0	0.375
813	34	1200	6.30598	6.26805	50.1631	50.2947	1.71474	1.77112	0	0	0	90	0	-5.19515	0	0	0	0	0.375
814	34	1260	5.82187	5.79476	52.2944	52.3927	1.61737	1.67055	0	0	0	90	0	-5.61528	0	0	0	0	0.375
815	34	1320	5.45586	5.43463	54.4105	54.4908	1.52001	1.56998	0	0	0	90	0	-5.91133	0	0	0	0	0.375
816	34	1380	5.17547	5.1606	56.5303	56.5889	1.42264	1.46941	0	0	0	90	0	-6.11361	0	0	0	0	0.375
817	35	0	4.96496	4.9521	58.6343	58.6869	1.32527	1.36884	0	0	0	90	0	-6.24516	0	0	0	0	0.375
818	35	60	4.83636	4.82679	63.3977	63.4401	1.07604	1.11141	0	0	0	90	0	-6.16019	0	0	0	0	0.375
819	35	120	4.70975	4.70148	68.1538	68.1932	0.826804	0.853986	0	0	0	90	0	-6.09045	0	0	0	0	0.375
820	35	180	4.58377	4.57617	72.9076	72.9464	0.577572	0.59656	0	0	0	90	0	-6.03403	0	0	0	0	0.375
821	35	240	4.45875	4.45086	77.6567	77.6995	0.254086	0.262439	0	0	0	90	0	-5.98938	0	0	0	0	0.375
822	35	300	4.33322	4.32555	83.7963	83.8414	0.172018	0.177673	0	0	0	90	0.0322179	-5.92231	0	0	0	0	0.375
823	35	360	4.63087	4.57886	83.5368	83.8414	0.449909	0.464701	0	0	0	83.3425	61.6126	-5.62177	0	0	0	0	0.375
824	35	420	6.09727	5.93144	76.7377	77.6232	0.727801	0.751729	0	0	0	69.9822	212.636	-4.31306	0	0	0	0	0.375
825	35	480	8.4608	8.17578	67.4801	68.7991	1.00569	1.03876	0	0	0	56.4088	359.017	-2.10436	0	0	0	0	0.375
826	35	540	11.317	10.9439	58.5072	59.9749	1.28358	1.32578	0	0	0	42.7426	494.364	0.652277	0	0	0	0	0.375
827	35	600	14.2074	13.7818	49.7569	51.1507	1.56148	1.61281	0	0	0	29.1427	596.42	3.41772	0	0	0	0	0.375
828	35	660	16.6713	16.2243	32.5622	33.5024	1.83937	1.89984	0	0	0	16.0981	664.572	4.91713	0	0	0	0	0.375
829	35	720	18.2861	17.8708	32.6391	33.5024	2.39515	2.4739	0	0	0	7.86567	686.722	6.79304	0	0	0	0	0.375
830	35	780	18.8671	18.4514	34.6855	35.5999	2.39515	2.4739	0	0	0	16.0981	664.167	7.64227	0	0	0	0	0.375
831	35	840	18.2748	17.8708	36.752	37.6973	2.29783	2.37338	0	0	0	29.1427	598.763	7.15597	0	0	0	0	0.375
832	35	900	16.5981	16.2243	38.8585	39.7948	2.20051	2.27285	0	0	0	42.7426	497.284	5.44101	0	0	0	0	0.375
833	35	960	14.0999	13.7818	41.0357	41.8922	2.10319	2.17233	0	0	0	56.4088	361.852	2.80766	0	0	0	0	0.375
834	35	1020	11.1844	10.9439	43.2924	43.9897	2.00587	2.07181	0	0	0	69.9822	214.74	-0.283485	0	0	0	0	0.375
835	35	1080	8.31876	8.17577	45.6415	46.0871	1.90855	1.97129	0	0	0	83.3425	62.3462	-3.29943	0	0	0	0	0.375
836	35	1140	6.94165	6.87335	47.959	48.1846	1.81122	1.87077	0	0	0	90	0.0325566	-4.652	0	0	0	0	0.375
837	35	1200	6.28958	6.2517	50.1507	50.2821	1.7139	1.77025	0	0	0	90	0	-5.23566	0	0	0	0	0.375
838	35	1260	5.80563	5.77854	52.2813	52.3795	1.61658	1.66973	0	0	0	90	0	-5.65552	0	0	0	0	0.375
839	35	1320	5.43961	5.41842	54.3968	54.477	1.51926	1.56921	0	0	0	90	0	-5.9514	0	0	0	0	0.375
840	35	1380	5.15919	5.14432	56.5158	56.5744	1.42194	1.46869	0	0	0	90	0	-6.15358	0	0	0	0	0.375
841	36	0	4.94852	4.93569	58.6194	58.6719	1.32462	1.36817	0	0	0	90	0	-6.28505	0	0	0	0	0.375
842	36	60	4.81985	4.8103	63.376	63.4184	1.07584	1.11121	0	0	0	90	0	-6.1998	0	0	0	0	0.375
843	36	120	4.69316	4.6849	68.1255	68.1648	0.82707	0.854261	0	0	0	90	0	-6.12979	0	0	0	0	0.375
844	36	180	4.56709	4.55951	72.8726	72.9113	0.578296	0.597308	0	0	0	90	0	-6.07312	0	0	0	0	0.375
845	36	240	4.44199	4.43412	77.6149	77.6577	0.253967	0.262317	0	0	0	90	0	-6.02823	0	0	0	0	0.375
846	36	300	4.31638	4.30873	83.7692	83.8142	0.170237	0.175834	0	0	0	90	0.0281988	-5.96276	0	0	0	0	0.375
847	36	360	4.6081	4.55694	83.5146	83.8142	0.448211	0.462947	0	0	0	83.4611	60.4728	-5.6677	0	0	0	0	0.375
848	36	420	6.07023	5.90557	76.7637	77.6434	0.726185	0.75006	0	0	0	70.0865	211.685	-4.36187	0	0	0	0	0.375
849	36	480	8.43301	8.14882	67.4971	68.8128	1.00416	1.03717	0	0	0	56.5045	358.429	-2.15443	0	0	0	0	0.375
850	36	540	11.291	10.9183	58.5157	59.9821	1.28213	1.32429	0	0	0	42.8367	494.123	0.603857	0	0	0	0	0.375
851	36	600	14.1845	13.7592	49.7582	51.1515	1.56011	1.6114	0	0	0	29.2489	596.446	3.37241	0	0	0	0	0.375
852	36	660	16.652	16.205	32.5502	33.4901	1.83808	1.89851	0	0	0	16.2568	664.765	4.87124	0	0	0	0	0.375
853	36	720	18.2692	17.8541	32.6273	33.4901	2.39403	2.47274	0	0	0	8.16428	686.975	6.75105	0	0	0	0	0.375
854	36	780	18.8513	18.4356	34.6729	35.587	2.39403	2.47274	0	0	0	16.2568	664.362	7.60243	0	0	0	0	0.375
855	36	840	18.2579	17.8541	36.7388	37.6838	2.29675	2.37226	0	0	0	29.2489	598.784	7.11535	0	0	0	0	0.375
856	36	900	16.5787	16.205	38.8449	39.7806	2.19948	2.27179	0	0	0	42.8367	497.035	5.39708	0	0	0	0	0.375
857	36	960	14.077	13.7592	41.0217	41.8775	2.1022	2.17132	0	0	0	56.5045	361.254	2.759	0	0	0	0	0.375
858	36	1020	11.1583	10.9183	43.2784	43.9743	2.00493	2.07084	0	0	0	70.0865	213.776	-0.336715	0	0	0	0	0.375
859	36	1080	8.29113	8.14881	45.6276	46.0711	1.90765	1.97037	0	0	0	83.4611	61.1912	-3.35542	0	0	0	0	0.375
860	36	1140	6.92391	6.85592	47.9435	48.168	1.81038	1.8699	0	0	0	90	0.0284942	-4.69746	0	0	0	0	0.375
861	36	1200	6.2724	6.2346	50.1338	50.2648	1.7131	1.76942	0	0	0	90	0	-5.28067	0	0	0	0	0.375
862	36	1260	5.78861	5.76157	52.2636	52.3616	1.61583	1.66895	0	0	0	90	0	-5.70026	0	0	0	0	0.375
863	36	1320	5.42257	5.40142	54.3785	54.4585	1.51855	1.56847	0	0	0	90	0	-5.99597	0	0	0	0	0.375
864	36	1380	5.14209	5.12723	56.4968	56.5553	1.42127	1.468	0	0	0	90	0	-6.19803	0	0	0	0	0.375
865	37	0	4.93124	4.91847	58.5999	58.6522	1.324	1.36753	0	0	0	90	0	-6.32939	0	0	0	0	0.375
866	37	60	4.8025	4.79299	63.3497	63.3919	1.07568	1.11105	0	0	0	90	0	-6.24376	0	0	0	0	0.375
867	37	120	4.67572	4.6675	68.0924	68.1316	0.827364	0.854565	0	0	0	90	0	-6.17338	0	0	0	0	0.375
868	37	180	4.54955	4.54202	72.8328	72.8713	0.579047	0.598084	0	0	0	90	0	-6.11637	0	0	0	0	0.375
869	37	240	4.42435	4.41653	77.5685	77.611	0.253852	0.262198	0	0	0	90	0	-6.07116	0	0	0	0	0.375
870	37	300	4.29864	4.29105	83.7382	83.7828	0.168437	0.173975	0	0	0	90	0.0246382	-6.00711	0	0	0	0	0.375
871	37	360	4.58443	4.53415	83.4885	83.7828	0.446501	0.46118	0	0	0	83.5816	59.3266	-5.71752	0	0	0	0	0.375
872	37	420	6.04235	5.87888	76.7864	77.6602	0.724564	0.748385	0	0	0	70.193	210.749	-4.4145	0	0	0	0	0.375
873	37	480	8.40457	8.12119	67.5105	68.8229	1.00263	1.03559	0	0	0	56.6025	357.884	-2.20815	0	0	0	0	0.375
874	37	540	11.2645	10.8923	58.5204	59.9857	1.28069	1.3228	0	0	0	42.9338	493.949	0.552072	0	0	0	0	0.375
875	37	600	14.1615	13.7364	49.7557	51.1484	1.55875	1.61	0	0	0	29.3593	596.559	3.32402	0	0	0	0	0.375
876	37	660	16.6328	16.1858	32.5342	33.4739	1.83682	1.89721	0	0	0	16.4219	665.056	4.82194	0	0	0	0	0.375
877	37	720	18.2526	17.8376	32.6115	33.4739	2.39294	2.47162	0	0	0	8.46751	687.329	6.706	0	0	0	0	0.375
878	37	780	18.8358	18.4201	34.6563	35.5701	2.39294	2.47162	0	0	0	16.4219	664.654	7.55976	0	0	0	0	0.375
879	37	840	18.2414	17.8376	36.7217	37.6663	2.29571	2.37119	0	0	0	29.3593	598.891	7.0719	0	0	0	0	0.375
880	37	900	16.5594	16.1858	38.8272	39.7625	2.19848	2.27076	0	0	0	42.9338	496.852	5.35008	0	0	0	0	0.375
881	37	960	14.054	13.7364	41.0038	41.8587	2.10125	2.17033	0	0	0	56.6025	360.696	2.70686	0	0	0	0	0.375
882	37	1020	11.1319	10.8923	43.2605	43.9549	2.00402	2.0699	0	0	0	70.193	212.825	-0.393882	0	0	0	0	0.375
883	37	1080	8.26282	8.12118	45.6098	46.0511	1.90679	1.96948	0	0	0	83.5816	60.0296	-3.41577	0	0	0	0	0.375
884	37	1140	6.90552	6.83787	47.9241	48.1473	1.80956	1.86905	0	0	0	90	0.0248952	-4.74726	0	0	0	0	0.375
885	37	1200	6.25457	6.21686	50.1129	50.2435	1.71232	1.76862	0	0	0	90	0	-5.33002	0	0	0	0	0.375
886	37	1260	5.77091	5.74393	52.2419	52.3397	1.61509	1.66819	0	0	0	90	0	-5.74933	0	0	0	0	0.375
887	37	1320	5.40483	5.38375	54.3562	54.4359	1.51786	1.56776	0	0	0	90	0	-6.04485	0	0	0	0	0.375
888	37	1380	5.12428	5.10945	56.4738	56.5322	1.42063	1.46733	0	0	0	90	0	-6.24676	0	0	0	0	0.375
889	38	0	4.91325	4.90056	58.5764	58.6284	1.3234	1.36691	0	0	0	90	0	-6.37799	0	0	0	0	0.375
890	38	60	4.78443	4.77497	63.3194	63.3613	1.07554	1.1109	0	0	0	90	0	-6.29186	0	0	0	0	0.375
891	38	120	4.65754	4.64939	68.0554	68.0942	0.827679	0.85489	0	0	0	90	0	-6.22102	0	0	0	0	0.375
892	38	180	4.53127	4.52381	72.7891	72.8271	0.57982	0.598882	0	0	0	90	0	-6.16358	0	0	0	0	0.375
893	38	240	4.40595	4.39823	77.518	77.56	0.253738	0.26208	0	0	0	90	0	-6.11797	0	0	0	0	0.375
894	38	300	4.28013	4.27264	83.704	83.748	0.166618	0.172096	0	0	0	90	0.021491	-6.05516	0	0	0	0	0.375
895	38	360	4.55996	4.51062	83.4592	83.748	0.444775	0.459398	0	0	0	83.7041	58.1741	-5.77106	0	0	0	0	0.375
896	38	420	6.01374	5.85147	76.8064	77.6741	0.722932	0.7467	0	0	0	70.3016	209.826	-4.47078	0	0	0	0	0.375
897	38	480	8.37554	8.09297	67.5209	68.8301	1.00109	1.034	0	0	0	56.703	357.377	-2.26537	0	0	0	0	0.375
898	38	540	11.2378	10.8659	58.5221	59.9861	1.27925	1.3213	0	0	0	43.034	493.839	0.497037	0	0	0	0	0.375
899	38	600	14.1384	13.7134	49.7499	51.1422	1.5574	1.60861	0	0	0	29.4739	596.755	3.27261	0	0	0	0	0.375
900	38	660	16.6137	16.1666	32.5147	33.4542	1.83556	1.89591	0	0	0	16.5933	665.441	4.76932	0	0	0	0	0.375
901	38	720	18.2363	17.8213	32.5923	33.4542	2.39188	2.47051	0	0	0	8.77524	687.782	6.65793	0	0	0	0	0.375
902	38	780	18.8206	18.4049	34.6363	35.5498	2.39188	2.47051	0	0	0	16.5933	665.04	7.5143	0	0	0	0	0.375
903	38	840	18.2251	17.8213	36.7011	37.6454	2.29469	2.37013	0	0	0	29.4739	599.08	7.02564	0	0	0	0	0.375
904	38	900	16.5401	16.1666	38.8061	39.7409	2.1975	2.26975	0	0	0	43.034	496.733	5.30005	0	0	0	0	0.375
905	38	960	14.0362	13.7134	40.9683	41.8365	2.10031	2.16936	0	0	0	56.703	360.177	2.65134	0	0	0	0	0.375
906	38	1020	11.1024	10.8659	43.2466	43.9321	2.00312	2.06898	0	0	0	70.3016	211.886	-0.454865	0	0	0	0	0.375
907	38	1080	8.23581	8.09296	45.5828	46.0277	1.90594	1.9686	0	0	0	83.7041	58.8612	-3.48033	0	0	0	0	0.375
908	38	1140	6.88659	6.81929	47.9012	48.1233	1.80875	1.86821	0	0	0	90	0.0217142	-4.80119	0	0	0	0	0.375
909	38	1200	6.23615	6.19859	50.0887	50.2188	1.71156	1.76783	0	0	0	90	0	-5.38352	0	0	0	0	0.375
910	38	1260	5.75267	5.72574	52.2168	52.3144	1.61437	1.66745	0	0	0	90	0	-5.80253	0	0	0	0	0.375
911	38	1320	5.38648	5.36552	54.3307	54.41	1.51718	1.56706	0	0	0	90	0	-6.09784	0	0	0	0	0.375
912	38	1380	5.10599	5.09111	56.447	56.5056	1.41999	1.46668	0	0	0	90	0	-6.29958	0	0	0	0	0.375
913	39	0	4.8946	4.88206	58.5499	58.6011	1.32281	1.3663	0	0	0	90	0	-6.43064	0	0	0	0	0.375
914	39	60	4.76576	4.75638	63.2857	63.3272	1.07541	1.11076	0	0	0	90	0	-6.34391	0	0	0	0	0.375
915	39	120	4.63877	4.63069	68.0148	68.0533	0.828009	0.855231	0	0	0	90	0	-6.27251	0	0	0	0	0.375
916	39	180	4.51238	4.50501	72.7418	72.7794	0.58061	0.599698	0	0	0	90	0	-6.21455	0	0	0	0	0.375
917	39	240	4.38694	4.37932	77.4641	77.5055	0.253625	0.261963	0	0	0	90	0	-6.16846	0	0	0	0	0.375
918	39	300	4.26101	4.25364	83.6673	83.7106	0.164778	0.170196	0	0	0	90	0.0187154	-6.10673	0	0	0	0	0.375
919	39	360	4.53487	4.48647	83.4273	83.7106	0.443032	0.457597	0	0	0	83.8285	57.0149	-5.82811	0	0	0	0	0.375
920	39	420	5.98451	5.82345	76.8242	77.6858	0.721285	0.744999	0	0	0	70.4122	208.914	-4.53053	0	0	0	0	0.375
921	39	480	8.34603	8.06424	67.529	68.835	0.999539	1.0324	0	0	0	56.8059	356.909	-2.32594	0	0	0	0	0.375
922	39	540	11.2107	10.8391	58.5211	59.9841	1.27779	1.3198	0	0	0	43.1372	493.792	0.438865	0	0	0	0	0.375
923	39	600	14.1152	13.6904	49.7414	51.1333	1.55605	1.6072	0	0	0	29.5926	597.031	3.21829	0	0	0	0	0.375
924	39	660	16.5948	16.1475	32.4923	33.4317	1.8343	1.8946	0	0	0	16.7711	665.917	4.71342	0	0	0	0	0.375
925	39	720	18.2202	17.8052	32.5702	33.4317	2.39081	2.46941	0	0	0	9.08735	688.33	6.60687	0	0	0	0	0.375
926	39	780	18.8057	18.3899	34.6134	35.5266	2.39081	2.46941	0	0	0	16.7711	665.518	7.46607	0	0	0	0	0.375
927	39	840	18.1991	17.8051	36.7007	37.6216	2.29366	2.36907	0	0	0	29.5926	599.349	6.97661	0	0	0	0	0.375
928	39	900	16.5189	16.1475	38.7874	39.7165	2.19652	2.26873	0	0	0	43.1372	496.675	5.24706	0	0	0	0	0.375
929	39	960	14.007	13.6904	40.96	41.8115	2.09937	2.16839	0	0	0	56.8059	359.694	2.59252	0	0	0	0	0.375
930	39	1020	11.0777	10.8391	43.2153	43.9064	2.00223	2.06805	0	0	0	70.4122	210.958	-0.519537	0	0	0	0	0.375
931	39	1080	8.20449	8.06424	45.5646	46.0014	1.90508	1.96772	0	0	0	83.8285	57.6858	-3.54893	0	0	0	0	0.375
932	39	1140	6.86721	6.80029	47.8756	48.0963	1.80794	1.86738	0	0	0	90	0.0189088	-4.85911	0	0	0	0	0.375
933	39	1200	6.21735	6.17988	50.0615	50.1913	1.71079	1.76704	0	0	0	90	0	-5.44097	0	0	0	0	0.375
934	39	1260	5.73392	5.7071	52.1891	52.2862	1.61365	1.6667	0	0	0	90	0	-5.85968	0	0	0	0	0.375
935	39	1320	5.36773	5.34684	54.3022	54.3812	1.5165	1.56636	0	0	0	90	0	-6.15476	0	0	0	0	0.375
936	39	1380	5.08699	5.0723	56.4183	56.4762	1.41936	1.46602	0	0	0	90	0	-6.35629	0	0	0	0	0.375
937	40	0	4.87561	4.8631	58.52	58.5711	1.32222	1.36569	0	0	0	90	0	-6.48715	0	0	0	0	0.375
938	40	60	4.74658	4.73731	63.2494	63.2904	1.07528	1.11063	0	0	0	90	0	-6.39972	0	0	0	0	0.375
939	40	120	4.61947	4.61152	67.9718	68.0096	0.828347	0.85558	0	0	0	90	0	-6.32767	0	0	0	0	0.375
940	40	180	4.49295	4.48573	72.6921	72.7289	0.581412	0.600527	0	0	0	90	0	-6.26911	0	0	0	0	0.375
941	40	240	4.36738	4.35994	77.4077	77.4481	0.25351	0.261844	0	0	0	90	0	-6.22245	0	0	0	0	0.375
942	40	300	4.24132	4.23415	83.629	83.6711	0.162918	0.168274	0	0	0	90	0.0162728	-6.16163	0	0	0	0	0.375
943	40	360	4.5092	4.46182	83.3938	83.6711	0.441268	0.455776	0	0	0	83.9548	55.849	-5.88851	0	0	0	0	0.375
944	40	420	5.95473	5.79493	76.8408	77.6961	0.719618	0.743277	0	0	0	70.5249	208.013	-4.59358	0	0	0	0	0.375
945	40	480	8.31609	8.03509	67.5355	68.8382	0.997968	1.03078	0	0	0	56.9112	356.475	-2.38972	0	0	0	0	0.375
946	40	540	11.1834	10.8121	58.5183	59.9804	1.27632	1.31828	0	0	0	43.2434	493.804	0.377673	0	0	0	0	0.375
947	40	600	14.0919	13.6672	49.7309	51.1225	1.55467	1.60578	0	0	0	29.7156	597.385	3.16112	0	0	0	0	0.375
948	40	660	16.5759	16.1284	32.4675	33.4067	1.83302	1.89328	0	0	0	16.9551	666.481	4.65432	0	0	0	0	0.375
949	40	720	18.2043	17.7892	32.5457	33.4067	2.38972	2.46828	0	0	0	9.40374	688.969	6.55288	0	0	0	0	0.375
950	40	780	18.7911	18.3751	34.588	35.5011	2.38972	2.46828	0	0	0	16.9551	666.084	7.41511	0	0	0	0	0.375
951	40	840	18.1836	17.7892	36.6738	37.5954	2.29262	2.36799	0	0	0	29.7156	599.695	6.92486	0	0	0	0	0.375
952	40	900	16.5	16.1284	38.7608	39.6898	2.19552	2.2677	0	0	0	43.2434	496.676	5.19117	0	0	0	0	0.375
953	40	960	13.9836	13.6672	40.9333	41.7841	2.09842	2.16741	0	0	0	56.9112	359.247	2.53049	0	0	0	0	0.375
954	40	1020	11.0503	10.8121	43.1889	43.8785	2.00132	2.06711	0	0	0	70.5249	210.04	-0.587776	0	0	0	0	0.375
955	40	1080	8.17462	8.03508	45.5385	45.9728	1.90422	1.96682	0	0	0	83.9548	56.5035	-3.62142	0	0	0	0	0.375
956	40	1140	6.84748	6.78096	47.8479	48.0672	1.80712	1.86653	0	0	0	90	0.01644	-4.92081	0	0	0	0	0.375
957	40	1200	6.19816	6.16083	50.0323	50.1615	1.71002	1.76624	0	0	0	90	0	-5.50221	0	0	0	0	0.375
958	40	1260	5.71483	5.68813	52.1592	52.2559	1.61292	1.66594	0	0	0	90	0	-5.92059	0	0	0	0	0.375
959	40	1320	5.34858	5.32781	54.2718	54.3502	1.51581	1.56565	0	0	0	90	0	-6.21541	0	0	0	0	0.375
960	40	1380	5.06775	5.05316	56.3872	56.4446	1.41871	1.46536	0	0	0	90	0	-6.4167	0	0	0	0	0.375
961	41	0	4.85617	4.8438	58.4884	58.5389	1.32161	1.36506	0	0	0	90	0	-6.54733	0	0	0	0	0.375
962	41	60	4.72704	4.7179	63.211	63.2514	1.07515	1.1105	0	0	0	90	0	-6.45909	0	0	0	0	0.375
963	41	120	4.5998	4.592	67.9267	67.9638	0.828686	0.85593	0	0	0	90	0	-6.3863	0	0	0	0	0.375
964	41	180	4.47316	4.4661	72.6403	72.6762	0.582222	0.601363	0	0	0	90	0	-6.32704	0	0	0	0	0.375
965	41	240	4.34744	4.3402	77.3494	77.3887	0.253391	0.261721	0	0	0	90	0	-6.27974	0	0	0	0	0.375
966	41	300	4.22126	4.2143	83.5896	83.6304	0.161037	0.166331	0	0	0	90	0.0141276	-6.21965	0	0	0	0	0.375
967	41	360	4.48314	4.4368	83.3593	83.6304	0.439482	0.45393	0	0	0	84.0828	54.6763	-5.95204	0	0	0	0	0.375
968	41	420	5.92455	5.76601	76.8568	77.7056	0.717927	0.74153	0	0	0	70.6396	207.121	-4.65975	0	0	0	0	0.375
969	41	480	8.28582	8.00559	67.541	68.8405	0.996372	1.02913	0	0	0	57.019	356.076	-2.45655	0	0	0	0	0.375
970	41	540	11.1558	10.7849	58.5142	59.9754	1.27482	1.31673	0	0	0	43.3527	493.873	0.313575	0	0	0	0	0.375
971	41	600	14.0686	13.6439	49.7188	51.1102	1.55326	1.60433	0	0	0	29.8428	597.812	3.10119	0	0	0	0	0.375
972	41	660	16.5571	16.1094	32.4409	33.38	1.83171	1.89193	0	0	0	17.1453	667.129	4.59207	0	0	0	0	0.375
973	41	720	18.1885	17.7734	32.5193	33.38	2.3886	2.46712	0	0	0	9.72428	689.698	6.49599	0	0	0	0	0.375
974	41	780	18.7767	18.3604	34.5609	35.4738	2.3886	2.46712	0	0	0	17.1453	666.734	7.36144	0	0	0	0	0.375
975	41	840	18.1684	17.7734	36.6451	37.5675	2.29154	2.36688	0	0	0	29.8428	600.114	6.87042	0	0	0	0	0.375
976	41	900	16.4811	16.1094	38.7324	39.6613	2.19449	2.26663	0	0	0	43.3527	496.732	5.13243	0	0	0	0	0.375
977	41	960	13.9603	13.6439	40.9049	41.7551	2.09743	2.16639	0	0	0	57.019	358.832	2.46533	0	0	0	0	0.375
978	41	1020	11.0226	10.7849	43.1608	43.8488	2.00038	2.06614	0	0	0	70.6396	209.13	-0.659456	0	0	0	0	0.375
979	41	1080	8.1444	8.00559	45.5107	45.9426	1.90332	1.9659	0	0	0	84.0828	55.3142	-3.69763	0	0	0	0	0.375
980	41	1140	6.82751	6.76139	47.8185	48.0364	1.80627	1.86565	0	0	0	90	0.0142719	-4.98613	0	0	0	0	0.375
981	41	1200	6.17872	6.14155	50.0015	50.1301	1.70921	1.76541	0	0	0	90	0	-5.56705	0	0	0	0	0.375
982	41	1260	5.69549	5.66893	52.1278	52.2239	1.61216	1.66516	0	0	0	90	0	-5.98507	0	0	0	0	0.375
983	41	1320	5.32918	5.30856	54.2398	54.3177	1.5151	1.56491	0	0	0	90	0	-6.2796	0	0	0	0	0.375
984	41	1380	5.04826	5.03378	56.3545	56.4114	1.41805	1.46467	0	0	0	90	0	-6.48062	0	0	0	0	0.375
985	42	0	4.83648	4.82426	58.4553	58.5052	1.32099	1.36442	0	0	0	90	0	-6.61097	0	0	0	0	0.375
986	42	60	4.70724	4.69826	63.1711	63.2108	1.07501	1.11035	0	0	0	90	0	-6.52183	0	0	0	0	0.375
987	42	120	4.57988	4.57225	67.8802	67.9165	0.829021	0.856276	0	0	0	90	0	-6.4482	0	0	0	0	0.375
988	42	180	4.45311	4.44624	72.5872	72.6221	0.583034	0.602202	0	0	0	90	0	-6.38817	0	0	0	0	0.375
989	42	240	4.32723	4.32024	77.2898	77.3278	0.253266	0.261592	0	0	0	90	0	-6.34014	0	0	0	0	0.375
990	42	300	4.20092	4.19423	83.5498	83.5891	0.159134	0.164365	0	0	0	90	0.0122474	-6.28061	0	0	0	0	0.375
991	42	360	4.45678	4.41152	83.3244	83.5891	0.43767	0.452059	0	0	0	84.2127	53.4969	-6.01852	0	0	0	0	0.375
992	42	420	5.89407	5.73681	76.8727	77.715	0.716206	0.739752	0	0	0	70.7563	206.237	-4.72887	0	0	0	0	0.375
993	42	480	8.2553	7.97584	67.5461	68.8424	0.994741	1.02744	0	0	0	57.1291	355.709	-2.52628	0	0	0	0	0.375
994	42	540	11.1281	10.7574	58.5094	59.9698	1.27328	1.31514	0	0	0	43.4651	493.997	0.246688	0	0	0	0	0.375
995	42	600	14.0452	13.6205	49.7058	51.0972	1.55181	1.60283	0	0	0	29.9743	598.312	3.03857	0	0	0	0	0.375
996	42	660	16.5384	16.0904	32.4129	33.352	1.83035	1.89052	0	0	0	17.3418	667.86	4.52676	0	0	0	0	0.375
997	42	720	18.1729	17.7576	32.4917	33.352	2.38742	2.46591	0	0	0	10.0489	690.512	6.43626	0	0	0	0	0.375
998	42	780	18.7624	18.3459	34.5324	35.4452	2.38742	2.46591	0	0	0	17.3418	667.467	7.30512	0	0	0	0	0.375
999	42	840	18.1534	17.7576	36.6151	37.5384	2.29041	2.36571	0	0	0	29.9743	600.604	6.81333	0	0	0	0	0.375
1000	42	900	16.4623	16.0904	38.7027	39.6317	2.19341	2.26552	0	0	0	43.4651	496.843	5.0709	0	0	0	0	0.375
1001	42	960	13.9368	13.6205	40.8753	41.7249	2.0964	2.16532	0	0	0	57.1291	358.448	2.39715	0	0	0	0	0.375
1002	42	1020	10.9948	10.7574	43.1316	43.8181	1.99939	2.06513	0	0	0	70.7563	208.227	-0.73445	0	0	0	0	0.375
1003	42	1080	8.11392	7.97584	45.4818	45.9113	1.90239	1.96493	0	0	0	84.2127	54.1179	-3.7774	0	0	0	0	0.375
1004	42	1140	6.80737	6.74168	47.7881	48.0045	1.80538	1.86473	0	0	0	90	0.0123717	-5.05489	0	0	0	0	0.375
1005	42	1200	6.15913	6.12214	49.9698	50.0977	1.70837	1.76454	0	0	0	90	0	-5.6353	0	0	0	0	0.375
1006	42	1260	5.67602	5.6496	52.0954	52.1909	1.61136	1.66434	0	0	0	90	0	-6.05294	0	0	0	0	0.375
1007	42	1320	5.30965	5.28919	54.2069	54.2841	1.51436	1.56414	0	0	0	90	0	-6.34713	0	0	0	0	0.375
1008	42	1380	5.02863	5.01429	56.321	56.3773	1.41735	1.46395	0	0	0	90	0	-6.54785	0	0	0	0	0.375
1009	43	0	4.81665	4.80462	58.4214	58.4706	1.32034	1.36375	0	0	0	90	0	-6.6779	0	0	0	0	0.375
1010	43	60	4.68732	4.6785	63.1305	63.1695	1.07484	1.11018	0	0	0	90	0	-6.58774	0	0	0	0	0.375
1011	43	120	4.55983	4.55239	67.833	67.8684	0.829344	0.85661	0	0	0	90	0	-6.51318	0	0	0	0	0.375
1012	43	180	4.43292	4.42627	72.5335	72.5673	0.583844	0.603039	0	0	0	90	0	-6.45229	0	0	0	0	0.375
1013	43	240	4.30689	4.30016	77.2297	77.2662	0.253134	0.261456	0	0	0	90	0	-6.40346	0	0	0	0	0.375
1014	43	300	4.18044	4.17404	83.5105	83.548	0.157209	0.162377	0	0	0	90	0.0106027	-6.34431	0	0	0	0	0.375
1015	43	360	4.43027	4.38612	83.2898	83.548	0.435829	0.450158	0	0	0	84.3443	52.3106	-6.08776	0	0	0	0	0.375
1016	43	420	5.86339	5.70744	76.8894	77.725	0.71445	0.737939	0	0	0	70.875	205.36	-4.80074	0	0	0	0	0.375
1017	43	480	8.22462	7.94592	67.5515	68.8447	0.993071	1.02572	0	0	0	57.2417	355.371	-2.59876	0	0	0	0	0.375
1018	43	540	11.1004	10.7299	58.5046	59.9643	1.27169	1.3135	0	0	0	43.5806	494.173	0.17713	0	0	0	0	0.375
1019	43	600	14.0218	13.597	49.6925	51.084	1.55031	1.60128	0	0	0	30.1101	598.879	2.97337	0	0	0	0	0.375
1020	43	660	16.5197	16.0714	32.3843	33.3233	1.82893	1.88906	0	0	0	17.5443	668.379	4.45844	0	0	0	0	0.375
1021	43	720	18.1573	17.742	32.4635	33.3233	2.38618	2.46462	0	0	0	10.3774	691.407	6.37372	0	0	0	0	0.375
1022	43	780	18.7481	18.3314	34.5034	35.416	2.38618	2.46462	0	0	0	17.5443	667.989	7.24616	0	0	0	0	0.375
1023	43	840	18.1386	17.742	36.5838	37.5087	2.28922	2.36448	0	0	0	30.1101	601.161	6.75363	0	0	0	0	0.375
1024	43	900	16.4437	16.0714	38.6722	39.6014	2.19226	2.26434	0	0	0	43.5806	497.004	5.00664	0	0	0	0	0.375
1025	43	960	13.9134	13.597	40.845	41.6941	2.09531	2.16419	0	0	0	57.2417	358.093	2.32602	0	0	0	0	0.375
1026	43	1020	10.9668	10.7299	43.1018	43.7868	1.99835	2.06405	0	0	0	70.875	207.331	-0.812632	0	0	0	0	0.375
1027	43	1080	8.08324	7.94592	45.4526	45.8795	1.90139	1.9639	0	0	0	84.3443	52.9146	-3.86056	0	0	0	0	0.375
1028	43	1140	6.78718	6.72193	47.7574	47.9722	1.80444	1.86376	0	0	0	90	0.0107095	-5.12691	0	0	0	0	0.375
1029	43	1200	6.13949	6.1027	49.9377	50.0649	1.70748	1.76362	0	0	0	90	0	-5.70678	0	0	0	0	0.375
1030	43	1260	5.65651	5.63026	52.0627	52.1576	1.61052	1.66347	0	0	0	90	0	-6.12399	0	0	0	0	0.375
1031	43	1320	5.29009	5.26981	54.1737	54.2503	1.51357	1.56333	0	0	0	90	0	-6.41782	0	0	0	0	0.375
1032	43	1380	5.00899	4.9948	56.2872	56.3429	1.41661	1.46318	0	0	0	90	0	-6.6182	0	0	0	0	0.375
1033	44	0	4.79681	4.78497	58.3873	58.4356	1.31965	1.36304	0	0	0	90	0	-6.74789	0	0	0	0	0.375
1034	44	60	4.66737	4.65875	63.0898	63.1279	1.07465	1.10998	0	0	0	90	0	-6.65663	0	0	0	0	0.375
1035	44	120	4.53976	4.53253	67.7858	67.8201	0.82965	0.856926	0	0	0	90	0	-6.58105	0	0	0	0	0.375
1036	44	180	4.41272	4.40631	72.4798	72.5124	0.584647	0.603868	0	0	0	90	0	-6.51921	0	0	0	0	0.375
1037	44	240	4.28652	4.28009	77.1698	77.2046	0.252992	0.26131	0	0	0	90	0	-6.4695	0	0	0	0	0.375
1038	44	300	4.15993	4.15387	83.4722	83.5077	0.155261	0.160366	0	0	0	90	0.00916657	-6.41055	0	0	0	0	0.375
1039	44	360	4.3962	4.36072	83.3003	83.5077	0.433959	0.448226	0	0	0	84.4775	51.1176	-6.15956	0	0	0	0	0.375
1040	44	420	5.83172	5.678	76.9122	77.7363	0.712656	0.736086	0	0	0	70.9957	204.488	-4.8752	0	0	0	0	0.375
1041	44	480	8.19376	7.91591	67.5582	68.8479	0.991354	1.02395	0	0	0	57.3566	355.061	-2.67385	0	0	0	0	0.375
1042	44	540	11.0725	10.7022	58.5005	59.9595	1.27005	1.31181	0	0	0	43.6992	494.398	0.105021	0	0	0	0	0.375
1043	44	600	13.9986	13.5736	49.679	51.0712	1.54875	1.59967	0	0	0	30.2502	599.512	2.90566	0	0	0	0	0.375
1044	44	660	16.5009	16.0524	32.3558	33.2944	1.82745	1.88753	0	0	0	17.753	669.262	4.38718	0	0	0	0	0.375
1045	44	720	18.1422	17.7263	32.4341	33.2944	2.38484	2.46325	0	0	0	10.7097	692.382	6.30843	0	0	0	0	0.375
1046	44	780	18.7341	18.3171	34.4739	35.3866	2.38484	2.46325	0	0	0	17.753	668.874	7.18461	0	0	0	0	0.375
1047	44	840	18.1227	17.7263	36.5552	37.4789	2.28794	2.36316	0	0	0	30.2502	601.784	6.69136	0	0	0	0	0.375
1048	44	900	16.4247	16.0524	38.6424	39.5711	2.19104	2.26307	0	0	0	43.6992	497.214	4.93971	0	0	0	0	0.375
1049	44	960	13.8898	13.5736	40.815	41.6633	2.09413	2.16298	0	0	0	57.3566	357.765	2.25205	0	0	0	0	0.375
1050	44	1020	10.9387	10.7022	43.0721	43.7555	1.99723	2.06289	0	0	0	70.9957	206.439	-0.893871	0	0	0	0	0.375
1051	44	1080	8.05247	7.9159	45.4233	45.8478	1.90033	1.96281	0	0	0	84.4775	51.7044	-3.94696	0	0	0	0	0.375
1052	44	1140	6.76702	6.70222	47.7268	47.94	1.80343	1.86272	0	0	0	90	0.00925827	-5.20202	0	0	0	0	0.375
1053	44	1200	6.11992	6.08334	49.9058	50.0322	1.70653	1.76263	0	0	0	90	0	-5.7813	0	0	0	0	0.375
1054	44	1260	5.63708	5.61101	52.0302	52.1244	1.60962	1.66254	0	0	0	90	0	-6.19805	0	0	0	0	0.375
1055	44	1320	5.27062	5.25053	54.1409	54.2166	1.51272	1.56245	0	0	0	90	0	-6.49148	0	0	0	0	0.375
1056	44	1380	4.98944	4.97541	56.2538	56.3089	1.41582	1.46237	0	0	0	90	0	-6.69146	0	0	0	0	0.375
1057	45	0	4.77708	4.76545	58.3536	58.4011	1.31892	1.36228	0	0	0	90	0	-6.82077	0	0	0	0	0.375
1058	45	60	4.64754	4.63912	63.0496	63.0868	1.07442	1.10975	0	0	0	90	0	-6.72831	0	0	0	0	0.375
1059	45	120	4.5198	4.5128	67.7392	67.7724	0.829931	0.857216	0	0	0	90	0	-6.65161	0	0	0	0	0.375
1060	45	180	4.39262	4.38648	72.4269	72.4581	0.585438	0.604685	0	0	0	90	0	-6.58873	0	0	0	0	0.375
1061	45	240	4.26626	4.26016	77.1107	77.1437	0.25284	0.261152	0	0	0	90	0	-6.53806	0	0	0	0	0.375
1062	45	300	4.13953	4.13384	83.4358	83.4691	0.153291	0.158331	0	0	0	90	0.00791484	-6.47914	0	0	0	0	0.375
1063	45	360	4.36991	4.33544	83.2676	83.4691	0.432055	0.446259	0	0	0	84.6125	49.9179	-6.23372	0	0	0	0	0.375
1064	45	420	5.801	5.6486	76.9321	77.7495	0.710819	0.734188	0	0	0	71.1183	203.62	-4.95206	0	0	0	0	0.375
1065	45	480	8.16299	7.88589	67.5661	68.8528	0.989583	1.02212	0	0	0	57.4739	354.777	-2.75137	0	0	0	0	0.375
1066	45	540	11.0447	10.6746	58.4974	59.9561	1.26835	1.31005	0	0	0	43.8209	494.67	0.0304822	0	0	0	0	0.375
1067	45	600	13.9752	13.5501	49.6668	51.0593	1.54711	1.59797	0	0	0	30.3946	600.208	2.83552	0	0	0	0	0.375
1068	45	660	16.4823	16.0333	32.3269	33.2659	1.82587	1.8859	0	0	0	17.9676	670.217	4.31306	0	0	0	0	0.375
1069	45	720	18.1269	17.7107	32.4057	33.2659	2.3834	2.46176	0	0	0	11.0457	693.432	6.24043	0	0	0	0	0.375
1070	45	780	18.7202	18.3027	34.4447	35.3577	2.3834	2.46176	0	0	0	17.9676	669.831	7.12049	0	0	0	0	0.375
1071	45	840	18.108	17.7107	36.5244	37.4495	2.28656	2.36173	0	0	0	30.3946	602.468	6.62656	0	0	0	0	0.375
1072	45	900	16.406	16.0333	38.6123	39.5413	2.18971	2.2617	0	0	0	43.8209	497.47	4.87018	0	0	0	0	0.375
1073	45	960	13.8663	13.5501	40.7852	41.6331	2.09287	2.16168	0	0	0	57.4739	357.462	2.17531	0	0	0	0	0.375
1074	45	1020	10.9107	10.6746	43.0429	43.7249	1.99603	2.06165	0	0	0	71.1183	205.551	-0.978037	0	0	0	0	0.375
1075	45	1080	8.02169	7.88588	45.3948	45.8167	1.89918	1.96162	0	0	0	84.6125	50.4873	-4.03642	0	0	0	0	0.375
1076	45	1140	6.747	6.68266	47.6969	47.9085	1.80234	1.86159	0	0	0	90	0.00799341	-5.28002	0	0	0	0	0.375
1077	45	1200	6.10052	6.06415	49.8747	50.0003	1.7055	1.76157	0	0	0	90	0	-5.85867	0	0	0	0	0.375
1078	45	1260	5.61783	5.59196	51.9986	52.0921	1.60865	1.66154	0	0	0	90	0	-6.27491	0	0	0	0	0.375
1079	45	1320	5.25135	5.23147	54.109	54.1839	1.51181	1.56151	0	0	0	90	0	-6.56789	0	0	0	0	0.375
1080	45	1380	4.97011	4.95626	56.2214	56.2757	1.41496	1.46148	0	0	0	90	0	-6.76745	0	0	0	0	0.375
1081	46	0	4.75756	4.74615	58.321	58.3675	1.31812	1.36146	0	0	0	90	0	-6.89632	0	0	0	0	0.375
1082	46	60	4.62792	4.61974	63.0106	63.0467	1.07415	1.10947	0	0	0	90	0	-6.80256	0	0	0	0	0.375
1083	46	120	4.50007	4.49332	67.6939	67.7259	0.830182	0.857475	0	0	0	90	0	-6.72466	0	0	0	0	0.375
1084	46	180	4.37275	4.3669	72.3754	72.4051	0.586212	0.605485	0	0	0	90	0	-6.66066	0	0	0	0	0.375
1085	46	240	4.24622	4.24048	77.0532	77.0843	0.252674	0.260981	0	0	0	90	0	-6.60895	0	0	0	0	0.375
1086	46	300	4.11936	4.11406	83.4018	83.4328	0.151298	0.156272	0	0	0	90	0.00682571	-6.54988	0	0	0	0	0.375
1087	46	360	4.34383	4.3104	83.2375	83.4328	0.430116	0.444256	0	0	0	84.749	48.7117	-6.31005	0	0	0	0	0.375
1088	46	420	5.77042	5.61936	76.9548	77.7653	0.708933	0.732241	0	0	0	71.2428	202.755	-5.03112	0	0	0	0	0.375
1089	46	480	8.13702	7.85595	67.5546	68.8599	0.987751	1.02022	0	0	0	57.5936	362.158	-2.83119	0	0	0	0	0.375
1090	46	540	11.0225	10.6469	58.4742	59.9545	1.26657	1.30821	0	0	0	43.9457	494.987	-0.0463635	0	0	0	0	0.375
1091	46	600	13.947	13.5266	49.6718	51.0491	1.54539	1.59619	0	0	0	30.5433	600.964	2.76306	0	0	0	0	0.375
1092	46	660	16.4594	16.0143	32.3081	33.2383	1.8242	1.88418	0	0	0	18.1881	671.241	4.23615	0	0	0	0	0.375
1093	46	720	18.1106	17.6951	32.38	33.2383	2.38184	2.46015	0	0	0	11.3853	694.554	6.16977	0	0	0	0	0.375
1094	46	780	18.7011	18.2883	34.4273	35.3297	2.38184	2.46015	0	0	0	18.1881	670.857	7.05386	0	0	0	0	0.375
1095	46	840	18.0988	17.6951	36.482	37.4212	2.28506	2.36018	0	0	0	30.5433	603.211	6.55928	0	0	0	0	0.375
1096	46	900	16.3881	16.0143	38.5815	39.5126	2.18828	2.26022	0	0	0	43.9457	497.77	4.79811	0	0	0	0	0.375
1097	46	960	13.8466	13.5266	40.7465	41.604	2.0915	2.16026	0	0	0	57.5936	364.88	2.09592	0	0	0	0	0.375
1098	46	1020	10.8843	10.6469	43.01	43.6955	1.99472	2.0603	0	0	0	71.2428	204.665	-1.06499	0	0	0	0	0.375
1099	46	1080	7.99139	7.85595	45.3664	45.7869	1.89794	1.96034	0	0	0	84.749	49.2636	-4.12877	0	0	0	0	0.375
1100	46	1140	6.72676	6.66333	47.6699	47.8784	1.80116	1.86037	0	0	0	90	0.00689291	-5.36074	0	0	0	0	0.375
1101	46	1200	6.08139	6.04522	49.845	49.9698	1.70438	1.76041	0	0	0	90	0	-5.93873	0	0	0	0	0.375
1102	46	1260	5.59899	5.57319	51.9681	52.0612	1.6076	1.66045	0	0	0	90	0	-6.35442	0	0	0	0	0.375
1103	46	1320	5.23233	5.21271	54.0787	54.1527	1.51082	1.56049	0	0	0	90	0	-6.6469	0	0	0	0	0.375
1104	46	1380	4.95131	4.93742	56.1896	56.2441	1.41404	1.46053	0	0	0	90	0	-6.84599	0	0	0	0	0.375
1105	47	0	4.73826	4.72718	58.2904	58.3356	1.31726	1.36056	0	0	0	90	0	-6.97438	0	0	0	0	0.375
1106	47	60	4.60868	4.60067	62.9731	63.0084	1.07383	1.10913	0	0	0	90	0	-6.87922	0	0	0	0	0.375
1107	47	120	4.48072	4.47416	67.6502	67.6812	0.830395	0.857695	0	0	0	90	0	-6.80003	0	0	0	0	0.375
1108	47	180	4.35328	4.34765	72.3255	72.3541	0.586963	0.606261	0	0	0	90	0	-6.73484	0	0	0	0	0.375
1109	47	240	4.22659	4.22114	76.9974	77.0269	0.252494	0.260795	0	0	0	90	0	-6.68201	0	0	0	0	0.375
1110	47	300	4.09959	4.09463	83.3703	83.3994	0.149282	0.15419	0	0	0	90	0.0058796	-6.62259	0	0	0	0	0.375
1111	47	360	4.31813	4.28569	83.2098	83.3994	0.42814	0.442215	0	0	0	84.887	47.499	-6.38838	0	0	0	0	0.375
1112	47	420	5.7401	5.59035	76.9804	77.7843	0.706997	0.73024	0	0	0	71.3691	201.892	-5.11225	0	0	0	0	0.375
1113	47	480	8.10654	7.82615	67.5672	68.8699	0.985854	1.01827	0	0	0	57.7157	361.944	-2.91314	0	0	0	0	0.375
1114	47	540	10.9949	10.6194	58.4749	59.9554	1.26471	1.30629	0	0	0	44.0736	495.345	-0.125403	0	0	0	0	0.375
1115	47	600	13.9238	13.5031	49.6628	51.0409	1.54357	1.59432	0	0	0	30.6964	601.775	2.68835	0	0	0	0	0.375
1116	47	660	16.4408	15.9953	32.2813	33.212	1.82243	1.88234	0	0	0	18.4144	672.329	4.15653	0	0	0	0	0.375
1117	47	720	18.0954	17.6794	32.3532	33.212	2.38014	2.45839	0	0	0	11.7283	695.744	6.09651	0	0	0	0	0.375
1118	47	780	18.6872	18.2739	34.4001	35.3031	2.38014	2.45839	0	0	0	18.4144	671.948	6.98477	0	0	0	0	0.375
1119	47	840	18.0836	17.6794	36.4545	37.3943	2.28343	2.3585	0	0	0	30.6964	604.009	6.48957	0	0	0	0	0.375
1120	47	900	16.3694	15.9953	38.554	39.4854	2.18672	2.25861	0	0	0	44.0736	498.111	4.72357	0	0	0	0	0.375
1121	47	960	13.8232	13.5031	40.7192	41.5765	2.09001	2.15872	0	0	0	57.7157	364.645	2.01397	0	0	0	0	0.375
1122	47	1020	10.8564	10.6193	42.9835	43.6677	1.9933	2.05883	0	0	0	71.3691	203.78	-1.15462	0	0	0	0	0.375
1123	47	1080	7.96083	7.82614	45.3407	45.7588	1.89658	1.95894	0	0	0	84.887	48.0333	-4.22387	0	0	0	0	0.375
1124	47	1140	6.70721	6.64427	47.6431	47.85	1.79987	1.85905	0	0	0	90	0.00593698	-5.44407	0	0	0	0	0.375
1125	47	1200	6.0625	6.02656	49.8171	49.9411	1.70316	1.75916	0	0	0	90	0	-6.02137	0	0	0	0	0.375
1126	47	1260	5.58028	5.55468	51.9398	52.0322	1.60645	1.65927	0	0	0	90	0	-6.43649	0	0	0	0	0.375
1127	47	1320	5.21362	5.19421	54.0503	54.1234	1.50974	1.55937	0	0	0	90	0	-6.72846	0	0	0	0	0.375
1128	47	1380	4.93253	4.91883	56.1608	56.2145	1.41303	1.45948	0	0	0	90	0	-6.92705	0	0	0	0	0.375
1129	48	0	4.71931	4.70847	58.2615	58.3057	1.31632	1.35959	0	0	0	90	0	-7.05494	0	0	0	0	0.375
1130	48	60	4.58963	4.58187	62.938	62.9723	1.07344	1.10873	0	0	0	90	0	-6.9583	0	0	0	0	0.375
1131	48	120	4.46155	4.45526	67.6091	67.6388	0.83056	0.857866	0	0	0	90	0	-6.87774	0	0	0	0	0.375
1132	48	180	4.33398	4.32866	72.2785	72.3054	0.587682	0.607003	0	0	0	90	0	-6.81127	0	0	0	0	0.375
1133	48	240	4.20713	4.20206	76.9447	76.972	0.252299	0.260594	0	0	0	90	0	-6.75726	0	0	0	0	0.375
1134	48	300	4.07998	4.07546	83.3419	83.3684	0.147245	0.152086	0	0	0	90	0.00505899	-6.69725	0	0	0	0	0.375
1135	48	360	4.29258	4.26123	83.1852	83.3684	0.426128	0.440137	0	0	0	85.0266	46.2797	-6.46867	0	0	0	0	0.375
1136	48	420	5.70987	5.56149	77.0091	77.8061	0.705011	0.728189	0	0	0	71.4973	201.027	-5.19539	0	0	0	0	0.375
1137	48	480	8.0761	7.79641	67.5823	68.8823	0.983894	1.01624	0	0	0	57.84	361.747	-2.9972	0	0	0	0	0.375
1138	48	540	10.9673	10.5918	58.4776	59.9584	1.26278	1.30429	0	0	0	44.2046	495.737	-0.206576	0	0	0	0	0.375
1139	48	600	13.9005	13.4795	49.6555	51.0345	1.54166	1.59235	0	0	0	30.8537	602.634	2.61147	0	0	0	0	0.375
1140	48	660	16.4222	15.9761	32.2556	33.1867	1.82054	1.8804	0	0	0	18.6465	673.472	4.0743	0	0	0	0	0.375
1141	48	720	18.0802	17.6636	32.3274	33.1867	2.37831	2.4565	0	0	0	12.0747	696.992	6.02076	0	0	0	0	0.375
1142	48	780	18.6733	18.2593	34.374	35.2776	2.37831	2.4565	0	0	0	18.6465	673.094	6.9133	0	0	0	0	0.375
1143	48	840	18.0683	17.6636	36.4281	37.3685	2.28167	2.35669	0	0	0	30.8537	604.855	6.41752	0	0	0	0	0.375
1144	48	900	16.3506	15.9761	38.5276	39.4594	2.18504	2.25687	0	0	0	44.2046	498.485	4.64665	0	0	0	0	0.375
1145	48	960	13.7997	13.4795	40.6932	41.5503	2.0884	2.15706	0	0	0	57.84	364.427	1.92954	0	0	0	0	0.375
1146	48	1020	10.8285	10.5918	42.9584	43.6412	1.99176	2.05724	0	0	0	71.4973	202.893	-1.24684	0	0	0	0	0.375
1147	48	1080	7.93033	7.79641	45.3166	45.7321	1.89513	1.95743	0	0	0	85.0266	46.7964	-4.32163	0	0	0	0	0.375
1148	48	1140	6.68783	6.62538	47.6179	47.823	1.79849	1.85762	0	0	0	90	0.00510792	-5.52992	0	0	0	0	0.375
1149	48	1200	6.04376	6.00806	49.7908	49.914	1.70185	1.7578	0	0	0	90	0	-6.10655	0	0	0	0	0.375
1150	48	1260	5.56171	5.53634	51.9133	52.0049	1.60522	1.65799	0	0	0	90	0	-6.5211	0	0	0	0	0.375
1151	48	1320	5.19503	5.17586	54.0236	54.0958	1.50858	1.55818	0	0	0	90	0	-6.81254	0	0	0	0	0.375
1152	48	1380	4.91388	4.9004	56.1338	56.1867	1.41194	1.45836	0	0	0	90	0	-7.01061	0	0	0	0	0.375
1153	49	0	4.70048	4.6899	58.2344	58.2776	1.3153	1.35855	0	0	0	90	0	-7.13797	0	0	0	0	0.375
1154	49	60	4.5707	4.5632	62.905	62.938	1.07299	1.10827	0	0	0	90	0	-7.03978	0	0	0	0	0.375
1155	49	120	4.44249	4.4365	67.5701	67.5985	0.83068	0.85799	0	0	0	90	0	-6.95778	0	0	0	0	0.375
1156	49	180	4.31479	4.30981	72.2337	72.2589	0.588367	0.607711	0	0	0	90	0	-6.88998	0	0	0	0	0.375
1157	49	240	4.18775	4.18311	76.8943	76.9194	0.252092	0.26038	0	0	0	90	0	-6.83472	0	0	0	0	0.375
1158	49	300	4.06047	4.05641	83.3158	83.3395	0.145187	0.14996	0	0	0	90	0.00434827	-6.77386	0	0	0	0	0.375
1159	49	360	4.26712	4.23688	83.1629	83.3395	0.424083	0.438025	0	0	0	85.1676	45.0538	-6.55093	0	0	0	0	0.375
1160	49	420	5.67965	5.53267	77.0403	77.8303	0.702979	0.726091	0	0	0	71.6273	200.158	-5.28053	0	0	0	0	0.375
1161	49	480	8.04562	7.76665	67.5994	68.8967	0.981875	1.01416	0	0	0	57.9667	361.564	-3.08332	0	0	0	0	0.375
1162	49	540	10.9354	10.5641	58.4985	59.963	1.26077	1.30222	0	0	0	44.3387	496.158	-0.289835	0	0	0	0	0.375
1163	49	600	13.8809	13.4559	49.6371	51.0294	1.53967	1.59029	0	0	0	31.0152	603.533	2.53248	0	0	0	0	0.375
1164	49	660	16.4037	15.9569	32.2299	33.1621	1.81856	1.87835	0	0	0	18.8841	674.663	3.98956	0	0	0	0	0.375
1165	49	720	18.065	17.6477	32.302	33.1621	2.37636	2.45448	0	0	0	12.4243	698.29	5.94263	0	0	0	0	0.375
1166	49	780	18.6594	18.2447	34.3482	35.2528	2.37636	2.45448	0	0	0	18.8841	674.288	6.83957	0	0	0	0	0.375
1167	49	840	18.0531	17.6477	36.4022	37.3436	2.2798	2.35475	0	0	0	31.0152	605.74	6.34325	0	0	0	0	0.375
1168	49	900	16.3318	15.9569	38.5019	39.4343	2.18324	2.25502	0	0	0	44.3387	498.886	4.56745	0	0	0	0	0.375
1169	49	960	13.7762	13.4559	40.6681	41.525	2.08668	2.15529	0	0	0	57.9667	364.221	1.84271	0	0	0	0	0.375
1170	49	1020	10.8005	10.5641	42.9342	43.6157	1.99013	2.05555	0	0	0	71.6273	202.001	-1.34157	0	0	0	0	0.375
1171	49	1080	7.89979	7.76665	45.2935	45.7065	1.89357	1.95582	0	0	0	85.1676	45.5528	-4.422	0	0	0	0	0.375
1172	49	1140	6.66849	6.60656	47.5939	47.7972	1.79701	1.85609	0	0	0	90	0.00438993	-5.61827	0	0	0	0	0.375
1173	49	1200	6.02506	5.98962	49.7657	49.8879	1.70045	1.75636	0	0	0	90	0	-6.19422	0	0	0	0	0.375
1174	49	1260	5.54317	5.51803	51.888	51.9786	1.6039	1.65663	0	0	0	90	0	-6.6082	0	0	0	0	0.375
1175	49	1320	5.17646	5.15754	53.9982	54.0694	1.50734	1.55689	0	0	0	90	0	-6.8991	0	0	0	0	0.375
1176	49	1380	4.89523	4.88198	56.1082	56.1601	1.41078	1.45716	0	0	0	90	0	-7.09663	0	0	0	0	0.375
1177	50	0	4.68165	4.67134	58.2088	58.2508	1.31422	1.35743	0	0	0	90	0	-7.22345	0	0	0	0	0.375
1178	50	60	4.55176	4.54455	62.8735	62.9052	1.07249	1.10775	0	0	0	90	0	-7.12363	0	0	0	0	0.375
1179	50	120	4.42342	4.41775	67.5328	67.5596	0.830755	0.858068	0	0	0	90	0	-7.04013	0	0	0	0	0.375
1180	50	180	4.29557	4.29095	72.1907	72.2141	0.589021	0.608386	0	0	0	90	0	-6.97093	0	0	0	0	0.375
1181	50	240	4.16835	4.16416	76.8459	76.8685	0.251872	0.260153	0	0	0	90	0	-6.91438	0	0	0	0	0.375
1182	50	300	4.0409	4.03736	83.2914	83.3121	0.14311	0.147815	0	0	0	90	0.0037336	-6.85242	0	0	0	0	0.375
1183	50	360	4.24161	4.21253	83.1423	83.3121	0.422007	0.435881	0	0	0	85.31	43.8212	-6.63515	0	0	0	0	0.375
1184	50	420	5.64932	5.50377	77.0734	77.8562	0.700904	0.723947	0	0	0	71.7591	199.282	-5.36765	0	0	0	0	0.375
1185	50	480	8.01501	7.73677	67.618	68.9125	0.979801	1.01201	0	0	0	58.0957	361.389	-3.17149	0	0	0	0	0.375
1186	50	540	10.9075	10.5363	58.5042	59.9689	1.2587	1.30008	0	0	0	44.4759	496.599	-0.375134	0	0	0	0	0.375
1187	50	600	13.8575	13.4321	49.6315	51.0252	1.53759	1.58815	0	0	0	31.1811	604.463	2.45146	0	0	0	0	0.375
1188	50	660	16.385	15.9376	32.205	33.1378	1.81649	1.87621	0	0	0	19.1272	675.891	3.90242	0	0	0	0	0.375
1189	50	720	18.0497	17.6317	32.2768	33.1378	2.37429	2.45234	0	0	0	12.7771	699.946	5.86222	0	0	0	0	0.375
1190	50	780	18.6453	18.23	34.3228	35.2284	2.37429	2.45234	0	0	0	19.1272	675.519	6.76369	0	0	0	0	0.375
1191	50	840	18.0377	17.6317	36.3768	37.319	2.27781	2.3527	0	0	0	31.1811	606.656	6.26684	0	0	0	0	0.375
1192	50	900	16.3128	15.9376	38.4766	39.4096	2.18134	2.25305	0	0	0	44.4759	499.308	4.48605	0	0	0	0	0.375
1193	50	960	13.7525	13.4321	40.6433	41.5002	2.08487	2.15341	0	0	0	58.0957	364.023	1.75357	0	0	0	0	0.375
1194	50	1020	10.7723	10.5363	42.9105	43.5908	1.98839	2.05376	0	0	0	71.7591	201.102	-1.43874	0	0	0	0	0.375
1195	50	1080	7.86912	7.73677	45.2709	45.6814	1.89192	1.95412	0	0	0	85.31	44.3026	-4.52491	0	0	0	0	0.375
1196	50	1140	6.6491	6.5877	47.5705	47.772	1.79545	1.85447	0	0	0	90	0.00376902	-5.70906	0	0	0	0	0.375
1197	50	1200	6.00629	5.97112	49.7414	49.8626	1.69897	1.75483	0	0	0	90	0	-6.28435	0	0	0	0	0.375
1198	50	1260	5.52454	5.49964	51.8634	51.9532	1.6025	1.65518	0	0	0	90	0	-6.69775	0	0	0	0	0.375
1199	50	1320	5.15779	5.13913	53.9736	54.0438	1.50603	1.55554	0	0	0	90	0	-6.98811	0	0	0	0	0.375
1200	50	1380	4.87647	4.86347	56.0834	56.1344	1.40955	1.45589	0	0	0	90	0	-7.1851	0	0	0	0	0.375
1201	51	0	4.6627	4.65268	58.1842	58.225	1.31308	1.35625	0	0	0	90	0	-7.31135	0	0	0	0	0.375
1202	51	60	4.5327	4.52578	62.843	62.8734	1.07193	1.10718	0	0	0	90	0	-7.20984	0	0	0	0	0.375
1203	51	120	4.40422	4.39888	67.4966	67.5219	0.83079	0.858103	0	0	0	90	0	-7.12478	0	0	0	0	0.375
1204	51	180	4.27622	4.27198	72.1489	72.1703	0.589645	0.60903	0	0	0	90	0	-7.05413	0	0	0	0	0.375
1205	51	240	4.14879	4.14508	76.7988	76.8188	0.251641	0.259915	0	0	0	90	0	-6.99623	0	0	0	0	0.375
1206	51	300	4.02118	4.01818	83.2681	83.2858	0.141016	0.145652	0	0	0	90	0.00320272	-6.93293	0	0	0	0	0.375
1207	51	360	4.21594	4.18804	83.1228	83.2858	0.419903	0.433707	0	0	0	85.4538	42.5821	-6.72134	0	0	0	0	0.375
1208	51	420	5.61877	5.47468	77.108	77.8835	0.698789	0.721763	0	0	0	71.8926	198.395	-5.45676	0	0	0	0	0.375
1209	51	480	7.98416	7.70666	67.6377	68.9295	0.977676	1.00982	0	0	0	58.227	361.216	-3.26167	0	0	0	0	0.375
1210	51	540	10.8794	10.5083	58.5105	59.9754	1.25656	1.29787	0	0	0	44.6161	497.054	-0.462426	0	0	0	0	0.375
1211	51	600	13.8339	13.4081	49.6264	51.0214	1.53545	1.58593	0	0	0	31.3512	605.416	2.36847	0	0	0	0	0.375
1212	51	660	16.366	15.918	32.1799	33.1134	1.81434	1.87398	0	0	0	19.3756	677.147	3.81299	0	0	0	0	0.375
1213	51	720	18.0342	17.6156	32.2516	33.1134	2.37211	2.4501	0	0	0	13.1328	701.315	5.77966	0	0	0	0	0.375
1214	51	780	18.6311	18.2151	34.2974	35.2039	2.37211	2.4501	0	0	0	19.3756	676.778	6.68577	0	0	0	0	0.375
1215	51	840	18.0221	17.6156	36.3513	37.2944	2.27572	2.35054	0	0	0	31.3512	607.594	6.18841	0	0	0	0	0.375
1216	51	900	16.2937	15.918	38.4514	39.3849	2.17934	2.25099	0	0	0	44.6161	499.742	4.40255	0	0	0	0	0.375
1217	51	960	13.7286	13.4081	40.6186	41.4754	2.08295	2.15143	0	0	0	58.227	363.826	1.6622	0	0	0	0	0.375
1218	51	1020	10.7439	10.5083	42.887	43.5659	1.98657	2.05188	0	0	0	71.8926	200.192	-1.5383	0	0	0	0	0.375
1219	51	1080	7.83821	7.70666	45.2486	45.6565	1.89018	1.95233	0	0	0	85.4538	43.0459	-4.63033	0	0	0	0	0.375
1220	51	1140	6.62955	6.56869	47.5473	47.747	1.7938	1.85277	0	0	0	90	0.0032328	-5.80223	0	0	0	0	0.375
1221	51	1200	5.98733	5.95243	49.7173	49.8375	1.69741	1.75322	0	0	0	90	0	-6.37689	0	0	0	0	0.375
1222	51	1260	5.5057	5.48106	51.8392	51.928	1.60103	1.65367	0	0	0	90	0	-6.78973	0	0	0	0	0.375
1223	51	1320	5.1389	5.12051	53.9494	54.0185	1.50464	1.55411	0	0	0	90	0	-7.07954	0	0	0	0	0.375
1224	51	1380	4.85748	4.84473	56.0591	56.109	1.40826	1.45456	0	0	0	90	0	-7.27597	0	0	0	0	0.375
1225	52	0	4.64351	4.63379	58.16	58.1996	1.31188	1.355	0	0	0	90	0	-7.40164	0	0	0	0	0.375
1226	52	60	4.51338	4.50677	62.8131	62.8421	1.07133	1.10655	0	0	0	90	0	-7.29839	0	0	0	0	0.375
1227	52	120	4.38476	4.37976	67.4611	67.4847	0.830785	0.858098	0	0	0	90	0	-7.21172	0	0	0	0	0.375
1228	52	180	4.2566	4.25275	72.1078	72.1273	0.59024	0.609645	0	0	0	90	0	-7.13958	0	0	0	0	0.375
1229	52	240	4.12897	4.12574	76.7525	76.7699	0.2514	0.259665	0	0	0	90	0	-7.08028	0	0	0	0	0.375
1230	52	300	4.00118	3.99873	83.2455	83.2599	0.138906	0.143472	0	0	0	90	0.00274479	-7.0154	0	0	0	0	0.375
1231	52	360	4.18998	4.1633	83.104	83.2599	0.417771	0.431506	0	0	0	85.5989	41.3367	-6.8095	0	0	0	0	0.375
1232	52	420	5.58789	5.44528	77.1436	77.9116	0.696637	0.71954	0	0	0	72.0279	197.496	-5.54784	0	0	0	0	0.375
1233	52	480	7.95298	7.67624	67.658	68.9469	0.975503	1.00757	0	0	0	58.3606	361.04	-3.35383	0	0	0	0	0.375
1234	52	540	10.8511	10.48	58.517	59.9823	1.25437	1.29561	0	0	0	44.7594	497.516	-0.551667	0	0	0	0	0.375
1235	52	600	13.8101	13.3839	49.6212	51.0177	1.53324	1.58364	0	0	0	31.5254	606.383	2.28358	0	0	0	0	0.375
1236	52	660	16.3469	15.8983	32.1542	33.0884	1.8121	1.87168	0	0	0	19.6293	678.422	3.72136	0	0	0	0	0.375
1237	52	720	18.0185	17.5993	32.2259	33.0884	2.36983	2.44774	0	0	0	13.4915	702.705	5.69503	0	0	0	0	0.375
1238	52	780	18.6167	18.2	34.2715	35.1789	2.36983	2.44774	0	0	0	19.6293	678.056	6.60591	0	0	0	0	0.375
1239	52	840	18.0064	17.5993	36.3254	37.2693	2.27354	2.34829	0	0	0	31.5254	608.545	6.10805	0	0	0	0	0.375
1240	52	900	16.2744	15.8983	38.4257	39.3598	2.17725	2.24883	0	0	0	44.7594	500.183	4.31704	0	0	0	0	0.375
1241	52	960	13.7045	13.3839	40.5936	41.4503	2.08096	2.14937	0	0	0	58.3606	363.627	1.56867	0	0	0	0	0.375
1242	52	1020	10.7152	10.48	42.8631	43.5408	1.98466	2.04991	0	0	0	72.0279	199.269	-1.64018	0	0	0	0	0.375
1243	52	1080	7.80698	7.67623	45.226	45.6313	1.88837	1.95045	0	0	0	85.5989	41.783	-4.73818	0	0	0	0	0.375
1244	52	1140	6.60973	6.54942	47.5239	47.7217	1.79208	1.851	0	0	0	90	0.0027703	-5.89776	0	0	0	0	0.375
1245	52	1200	5.96807	5.93346	49.693	49.8122	1.69579	1.75154	0	0	0	90	0	-6.4718	0	0	0	0	0.375
1246	52	1260	5.48654	5.46217	51.8149	51.9027	1.59949	1.65208	0	0	0	90	0	-6.88408	0	0	0	0	0.375
1247	52	1320	5.11966	5.10156	53.9251	53.9932	1.5032	1.55262	0	0	0	90	0	-7.17335	0	0	0	0	0.375
1248	52	1380	4.83812	4.82564	56.0348	56.0837	1.40691	1.45316	0	0	0	90	0	-7.36922	0	0	0	0	0.375
1249	53	0	4.62394	4.61453	58.1358	58.1741	1.31062	1.3537	0	0	0	90	0	-7.4943	0	0	0	0	0.375
1250	53	60	4.49369	4.4874	62.7833	62.8109	1.07068	1.10588	0	0	0	90	0	-7.38926	0	0	0	0	0.375
1251	53	120	4.36491	4.36028	67.4258	67.4477	0.830744	0.858056	0	0	0	90	0	-7.30093	0	0	0	0	0.375
1252	53	180	4.23658	4.23315	72.0671	72.0845	0.590808	0.610231	0	0	0	90	0	-7.22725	0	0	0	0	0.375
1253	53	240	4.10873	4.10602	76.7066	76.7213	0.251149	0.259406	0	0	0	90	0	-7.16653	0	0	0	0	0.375
1254	53	300	3.98076	3.97889	83.2231	83.234	0.13678	0.141277	0	0	0	90	0.00235029	-7.09983	0	0	0	0	0.375
1255	53	360	4.16362	4.13816	83.0853	83.234	0.415616	0.42928	0	0	0	85.7452	40.0853	-6.89963	0	0	0	0	0.375
1256	53	420	5.55656	5.41546	77.1796	77.94	0.694452	0.717283	0	0	0	72.1648	196.581	-5.64089	0	0	0	0	0.375
1257	53	480	7.92136	7.64539	67.6785	68.9645	0.973288	1.00529	0	0	0	58.4964	360.857	-3.44797	0	0	0	0	0.375
1258	53	540	10.8223	10.4513	58.5235	59.989	1.25212	1.29329	0	0	0	44.9057	497.978	-0.642815	0	0	0	0	0.375
1259	53	600	13.786	13.3594	49.6156	51.0135	1.53096	1.58129	0	0	0	31.7039	607.357	2.19684	0	0	0	0	0.375
1260	53	660	16.3275	15.8783	32.1277	33.0625	1.8098	1.86929	0	0	0	19.8881	679.707	3.62765	0	0	0	0	0.375
1261	53	720	18.0026	17.5828	32.1993	33.0625	2.36747	2.4453	0	0	0	13.8529	704.106	5.60846	0	0	0	0	0.375
1262	53	780	18.6022	18.1848	34.2447	35.153	2.36747	2.4453	0	0	0	19.8881	679.344	6.52421	0	0	0	0	0.375
1263	53	840	17.9906	17.5828	36.2986	37.2435	2.27127	2.34594	0	0	0	31.7039	609.503	6.02587	0	0	0	0	0.375
1264	53	900	16.2549	15.8783	38.3992	39.334	2.17507	2.24658	0	0	0	44.9057	500.623	4.22962	0	0	0	0	0.375
1265	53	960	13.6801	13.3594	40.5678	41.4244	2.07888	2.14722	0	0	0	58.4964	363.419	1.47307	0	0	0	0	0.375
1266	53	1020	10.6862	10.4513	42.8386	43.5149	1.98268	2.04787	0	0	0	72.1648	198.329	-1.7443	0	0	0	0	0.375
1267	53	1080	7.77531	7.64539	45.2028	45.6054	1.88649	1.94851	0	0	0	85.7452	40.5142	-4.84841	0	0	0	0	0.375
1268	53	1140	6.58952	6.52977	47.5	47.6959	1.79029	1.84915	0	0	0	90	0.0023719	-5.99559	0	0	0	0	0.375
1269	53	1200	5.94839	5.91408	49.6682	49.7863	1.69409	1.74979	0	0	0	90	0	-6.56904	0	0	0	0	0.375
1270	53	1260	5.46694	5.44283	51.79	51.8768	1.5979	1.65043	0	0	0	90	0	-6.98078	0	0	0	0	0.375
1271	53	1320	5.09996	5.08215	53.9004	53.9673	1.5017	1.55107	0	0	0	90	0	-7.26952	0	0	0	0	0.375
1272	53	1380	4.81829	4.80609	56.01	56.0578	1.4055	1.45171	0	0	0	90	0	-7.46482	0	0	0	0	0.375
1273	54	0	4.60389	4.59479	58.1113	58.1483	1.30931	1.35235	0	0	0	90	0	-7.58931	0	0	0	0	0.375
1274	54	60	4.47349	4.46754	62.7531	62.7793	1.06999	1.10517	0	0	0	90	0	-7.48243	0	0	0	0	0.375
1275	54	120	4.34455	4.34029	67.3902	67.4103	0.830669	0.857979	0	0	0	90	0	-7.3924	0	0	0	0	0.375
1276	54	180	4.21605	4.21304	72.0261	72.0414	0.59135	0.610792	0	0	0	90	0	-7.31715	0	0	0	0	0.375
1277	54	240	4.08796	4.08578	76.6606	76.6724	0.250889	0.259138	0	0	0	90	0	-7.25496	0	0	0	0	0.375
1278	54	300	3.95979	3.95853	83.2002	83.2076	0.134641	0.139067	0	0	0	90	0.00201083	-7.18624	0	0	0	0	0.375
1279	54	360	4.13672	4.11252	83.0662	83.2076	0.413438	0.427031	0	0	0	85.8928	38.8286	-6.99174	0	0	0	0	0.375
1280	54	420	5.52466	5.38509	77.2155	77.9681	0.692235	0.714994	0	0	0	72.3034	195.648	-5.73589	0	0	0	0	0.375
1281	54	480	7.88921	7.61402	67.6986	68.9816	0.971033	1.00296	0	0	0	58.6344	360.662	-3.54405	0	0	0	0	0.375
1282	54	540	10.7931	10.4222	58.5293	59.995	1.24983	1.29092	0	0	0	45.055	498.433	-0.735828	0	0	0	0	0.375
1283	54	600	13.7614	13.3344	49.6092	51.0085	1.52863	1.57888	0	0	0	31.8864	608.329	2.10834	0	0	0	0	0.375
1284	54	660	16.3079	15.8581	32.0998	33.0353	1.80742	1.86685	0	0	0	20.1519	680.992	3.53194	0	0	0	0	0.375
1285	54	720	17.9865	17.566	32.1714	33.0353	2.36502	2.44277	0	0	0	14.217	705.509	5.52005	0	0	0	0	0.375
1286	54	780	18.5874	18.1694	34.2167	35.1259	2.36502	2.44277	0	0	0	20.1519	680.633	6.44079	0	0	0	0	0.375
1287	54	840	17.9745	17.566	36.2706	37.2164	2.26892	2.34352	0	0	0	31.8864	610.459	5.94196	0	0	0	0	0.375
1288	54	900	16.2351	15.8581	38.3715	39.3069	2.17283	2.24426	0	0	0	45.055	501.057	4.14036	0	0	0	0	0.375
1289	54	960	13.6552	13.3344	40.5408	41.3974	2.07673	2.145	0	0	0	58.6344	363.199	1.37547	0	0	0	0	0.375
1290	54	1020	10.6566	10.4222	42.813	43.4879	1.98063	2.04575	0	0	0	72.3034	197.372	-1.8506	0	0	0	0	0.375
1291	54	1080	7.74311	7.61402	45.1785	45.5784	1.88454	1.94649	0	0	0	85.8928	39.2402	-4.96098	0	0	0	0	0.375
1292	54	1140	6.56882	6.50964	47.475	47.6689	1.78844	1.84724	0	0	0	90	0.00202912	-6.09568	0	0	0	0	0.375
1293	54	1200	5.92818	5.89417	49.6424	49.7594	1.69234	1.74798	0	0	0	90	0	-6.66858	0	0	0	0	0.375
1294	54	1260	5.44677	5.42295	51.7642	51.8499	1.59624	1.64872	0	0	0	90	0	-7.0798	0	0	0	0	0.375
1295	54	1320	5.07967	5.06217	53.8747	53.9405	1.50015	1.54947	0	0	0	90	0	-7.368	0	0	0	0	0.375
1296	54	1380	4.79785	4.78594	55.9843	56.031	1.40405	1.45021	0	0	0	90	0	-7.56275	0	0	0	0	0.375
1297	55	0	4.58321	4.57445	58.0858	58.1215	1.30795	1.35096	0	0	0	90	0	-7.68664	0	0	0	0	0.375
1298	55	60	4.45266	4.44706	62.7222	62.7468	1.06926	1.10441	0	0	0	90	0	-7.57788	0	0	0	0	0.375
1299	55	120	4.32355	4.31967	67.3538	67.3722	0.830564	0.85787	0	0	0	90	0	-7.48613	0	0	0	0	0.375
1300	55	180	4.19486	4.19229	71.9845	71.9975	0.591869	0.611327	0	0	0	90	0	-7.40927	0	0	0	0	0.375
1301	55	240	4.06653	4.0649	76.614	76.6228	0.250622	0.258862	0	0	0	90	0	-7.3456	0	0	0	0	0.375
1302	55	300	3.93815	3.93752	83.1765	83.1802	0.132489	0.136845	0	0	0	90	0.00171907	-7.27462	0	0	0	0	0.375
1303	55	360	4.10916	4.08623	83.0463	83.1802	0.41124	0.42476	0	0	0	86.0416	37.5671	-7.08583	0	0	0	0	0.375
1304	55	420	5.49207	5.35407	77.2509	77.9956	0.689991	0.712676	0	0	0	72.4435	194.694	-5.83285	0	0	0	0	0.375
1305	55	480	7.85641	7.58204	67.7179	68.9978	0.968742	1.00059	0	0	0	58.7746	360.449	-3.64205	0	0	0	0	0.375
1306	55	540	10.7634	10.3925	58.5341	60	1.24749	1.28851	0	0	0	45.2073	498.876	-0.830664	0	0	0	0	0.375
1307	55	600	13.7365	13.3091	49.6015	51.0021	1.52624	1.57642	0	0	0	32.0731	609.291	2.01812	0	0	0	0	0.375
1308	55	660	16.2879	15.8375	32.0704	33.0065	1.805	1.86434	0	0	0	20.4205	682.27	3.43435	0	0	0	0	0.375
1309	55	720	17.9702	17.5491	32.1419	33.0065	2.3625	2.44017	0	0	0	14.5836	706.905	5.42991	0	0	0	0	0.375
1310	55	780	18.5725	18.1537	34.187	35.097	2.3625	2.44017	0	0	0	20.4205	681.914	6.35575	0	0	0	0	0.375
1311	55	840	17.9581	17.5491	36.241	37.1876	2.2665	2.34102	0	0	0	32.0731	611.404	5.85642	0	0	0	0	0.375
1312	55	900	16.2149	15.8375	38.3423	39.2782	2.17051	2.24187	0	0	0	45.2073	501.477	4.04937	0	0	0	0	0.375
1313	55	960	13.63	13.3091	40.5124	41.3688	2.07451	2.14272	0	0	0	58.7746	362.961	1.27595	0	0	0	0	0.375
1314	55	1020	10.6265	10.3925	42.7858	43.4593	1.97852	2.04357	0	0	0	72.4435	196.393	-1.95902	0	0	0	0	0.375
1315	55	1080	7.71028	7.58204	45.1528	45.5499	1.88253	1.94442	0	0	0	86.0416	37.9616	-5.07584	0	0	0	0	0.375
1316	55	1140	6.54751	6.48891	47.4485	47.6405	1.78653	1.84527	0	0	0	90	0.00173453	-6.19798	0	0	0	0	0.375
1317	55	1200	5.90733	5.87363	49.6151	49.7311	1.69054	1.74612	0	0	0	90	0	-6.77037	0	0	0	0	0.375
1318	55	1260	5.42593	5.4024	51.7369	51.8216	1.59454	1.64697	0	0	0	90	0	-7.18109	0	0	0	0	0.375
1319	55	1320	5.05868	5.04149	53.8476	53.9122	1.49855	1.54782	0	0	0	90	0	-7.46878	0	0	0	0	0.375
1320	55	1380	4.77669	4.76507	55.9573	56.0028	1.40255	1.44867	0	0	0	90	0	-7.66298	0	0	0	0	0.375
1321	56	0	4.56179	4.55337	58.0591	58.0933	1.30656	1.34951	0	0	0	90	0	-7.78627	0	0	0	0	0.375
1322	56	60	4.43108	4.42584	62.69	62.713	1.0685	1.10362	0	0	0	90	0	-7.67561	0	0	0	0	0.375
1323	56	120	4.30179	4.29831	67.3163	67.3327	0.83043	0.857732	0	0	0	90	0	-7.58209	0	0	0	0	0.375
1324	56	180	4.1729	4.17078	71.9417	71.9524	0.592366	0.61184	0	0	0	90	0	-7.50362	0	0	0	0	0.375
1325	56	240	4.04432	4.04325	76.5663	76.5721	0.250348	0.258578	0	0	0	90	0	-7.43843	0	0	0	0	0.375
1326	56	300	3.91571	3.91572	83.1513	83.1513	0.130326	0.134611	0	0	0	90	0.00146858	-7.36499	0	0	0	0	0.375
1327	56	360	4.08082	4.05918	83.0249	83.1513	0.409024	0.422471	0	0	0	86.1915	36.3016	-7.1819	0	0	0	0	0.375
1328	56	420	5.45841	5.32228	77.2868	78.0219	0.687722	0.710332	0	0	0	72.5853	193.328	-5.93176	0	0	0	0	0.375
1329	56	480	7.8227	7.54934	67.7368	69.0126	0.966421	0.998193	0	0	0	58.9169	360.215	-3.74195	0	0	0	0	0.375
1330	56	540	10.7329	10.3622	58.5376	60.0033	1.24512	1.28605	0	0	0	45.3626	499.298	-0.927284	0	0	0	0	0.375
1331	56	600	13.711	13.2833	49.5922	50.994	1.52382	1.57391	0	0	0	32.2637	610.235	1.92624	0	0	0	0	0.375
1332	56	660	16.2676	15.8165	32.0389	32.9755	1.80252	1.86178	0	0	0	20.6938	683.531	3.33496	0	0	0	0	0.375
1333	56	720	17.9536	17.5318	32.1103	32.9755	2.35991	2.4375	0	0	0	14.9527	708.284	5.33814	0	0	0	0	0.375
1334	56	780	18.5573	18.1379	34.1554	35.0662	2.35991	2.4375	0	0	0	20.6938	683.178	6.26918	0	0	0	0	0.375
1335	56	840	17.9415	17.5318	36.2095	37.1568	2.26402	2.33846	0	0	0	32.2637	612.331	5.76934	0	0	0	0	0.375
1336	56	900	16.1944	15.8165	38.3111	39.2475	2.16813	2.23941	0	0	0	45.3626	501.877	3.95672	0	0	0	0	0.375
1337	56	960	13.6042	13.2833	40.482	41.3381	2.07224	2.14037	0	0	0	58.9169	362.701	1.17459	0	0	0	0	0.375
1338	56	1020	10.5956	10.3622	42.7573	43.4288	1.97635	2.04133	0	0	0	72.5853	194.999	-2.06951	0	0	0	0	0.375
1339	56	1080	7.67663	7.54934	45.1254	45.5195	1.88047	1.94229	0	0	0	86.1915	36.6791	-5.19293	0	0	0	0	0.375
1340	56	1140	6.52547	6.46748	47.4202	47.6101	1.78458	1.84325	0	0	0	90	0.00148164	-6.30245	0	0	0	0	0.375
1341	56	1200	5.8857	5.85234	49.586	49.7008	1.68869	1.7442	0	0	0	90	0	-6.87437	0	0	0	0	0.375
1342	56	1260	5.40428	5.38105	51.7079	51.7914	1.5928	1.64516	0	0	0	90	0	-7.28463	0	0	0	0	0.375
1343	56	1320	5.03686	5.01999	53.8187	53.8821	1.49691	1.54612	0	0	0	90	0	-7.57183	0	0	0	0	0.375
1344	56	1380	4.75467	4.74336	55.9285	55.9727	1.40102	1.44708	0	0	0	90	0	-7.76549	0	0	0	0	0.375
1345	57	0	4.5395	4.53143	58.0306	58.0634	1.30513	1.34804	0	0	0	90	0	-7.88819	0	0	0	0	0.375
1346	57	60	4.40862	4.40375	62.656	62.6775	1.0677	1.1028	0	0	0	90	0	-7.77559	0	0	0	0	0.375
1347	57	120	4.27914	4.27606	67.277	67.2915	0.830271	0.857567	0	0	0	90	0	-7.6803	0	0	0	0	0.375
1348	57	180	4.15004	4.14838	71.8972	71.9056	0.592842	0.612332	0	0	0	90	0	-7.60017	0	0	0	0	0.375
1349	57	240	4.02118	4.0207	76.5171	76.5197	0.250067	0.258288	0	0	0	90	0	-7.53346	0	0	0	0	0.375
1350	57	300	3.89234	3.89302	83.1243	83.1203	0.128153	0.132366	0	0	0	90	0.00125373	-7.45736	0	0	0	0	0.375
1351	57	360	4.05156	4.03124	83.0017	83.1203	0.406792	0.420166	0	0	0	86.3425	35.033	-7.27998	0	0	0	0	0.375
1352	57	420	5.4241	5.28959	77.3197	78.0464	0.685432	0.707966	0	0	0	72.7286	192.324	-6.03261	0	0	0	0	0.375
1353	57	480	7.78831	7.51583	67.7532	69.0255	0.964071	0.995766	0	0	0	59.0614	359.955	-3.84374	0	0	0	0	0.375
1354	57	540	10.7018	10.3312	58.539	60.0047	1.24271	1.28357	0	0	0	45.5207	499.695	-1.02565	0	0	0	0	0.375
1355	57	600	13.685	13.2569	49.5808	50.9838	1.52135	1.57137	0	0	0	32.4584	611.154	1.83278	0	0	0	0	0.375
1356	57	660	16.2468	15.7952	32.0051	32.9421	1.79999	1.85917	0	0	0	20.9717	684.766	3.23388	0	0	0	0	0.375
1357	57	720	17.9366	17.5143	32.0764	32.9421	2.35727	2.43477	0	0	0	15.3241	709.638	5.24484	0	0	0	0	0.375
1358	57	780	18.5418	18.1217	34.1214	35.0328	2.35727	2.43477	0	0	0	20.9717	684.416	6.1812	0	0	0	0	0.375
1359	57	840	17.9245	17.5143	36.1756	37.1236	2.26149	2.33584	0	0	0	32.4584	613.233	5.68083	0	0	0	0	0.375
1360	57	900	16.1735	15.7952	38.2776	39.2143	2.1657	2.23691	0	0	0	45.5207	502.25	3.8625	0	0	0	0	0.375
1361	57	960	13.5779	13.2569	40.4493	41.3051	2.06992	2.13797	0	0	0	59.0614	362.415	1.07145	0	0	0	0	0.375
1362	57	1020	10.5642	10.3312	42.726	43.3959	1.97414	2.03904	0	0	0	72.7286	193.97	-2.18198	0	0	0	0	0.375
1363	57	1080	7.64224	7.51582	45.0955	45.4866	1.87836	1.94011	0	0	0	86.3425	35.3937	-5.3122	0	0	0	0	0.375
1364	57	1140	6.50262	6.44524	47.3896	47.5774	1.78258	1.84118	0	0	0	90	0.00126475	-6.40906	0	0	0	0	0.375
1365	57	1200	5.86321	5.83018	49.5546	49.6681	1.6868	1.74225	0	0	0	90	0	-6.98056	0	0	0	0	0.375
1366	57	1260	5.38171	5.3588	51.6765	51.7589	1.59101	1.64332	0	0	0	90	0	-7.39039	0	0	0	0	0.375
1367	57	1320	5.01409	4.99755	53.7876	53.8497	1.49523	1.54439	0	0	0	90	0	-7.67712	0	0	0	0	0.375
1368	57	1380	4.73168	4.72069	55.8975	55.9404	1.39945	1.44546	0	0	0	90	0	-7.87025	0	0	0	0	0.375
1369	58	0	4.51622	4.50851	57.9998	58.0312	1.30367	1.34653	0	0	0	90	0	-7.99236	0	0	0	0	0.375
1370	58	60	4.38516	4.38066	62.6199	62.6397	1.06688	1.10195	0	0	0	90	0	-7.87781	0	0	0	0	0.375
1371	58	120	4.25547	4.25281	67.2356	67.2481	0.830089	0.857379	0	0	0	90	0	-7.78072	0	0	0	0	0.375
1372	58	180	4.12615	4.12496	71.8506	71.8566	0.5933	0.612805	0	0	0	90	0	-7.69894	0	0	0	0	0.375
1373	58	240	3.99701	3.99712	76.4657	76.4651	0.249782	0.257994	0	0	0	90	0	-7.6307	0	0	0	0	0.375
1374	58	300	3.86791	3.86927	83.0948	83.0868	0.12597	0.130111	0	0	0	90	0.00106964	-7.55173	0	0	0	0	0.375
1375	58	360	4.02127	4.00227	82.9759	83.0868	0.404546	0.417846	0	0	0	86.4945	33.7623	-7.38006	0	0	0	0	0.375
1376	58	420	5.38875	5.2559	77.3505	78.0687	0.683122	0.70558	0	0	0	72.8733	191.292	-6.13542	0	0	0	0	0.375
1377	58	480	7.75296	7.48139	67.7675	69.0361	0.961698	0.993315	0	0	0	59.2079	359.664	-3.9474	0	0	0	0	0.375
1378	58	540	10.6699	10.2995	58.5382	60.0035	1.24027	1.28105	0	0	0	45.6818	500.059	-1.12573	0	0	0	0	0.375
1379	58	600	13.6596	13.23	49.5631	50.9709	1.51885	1.56878	0	0	0	32.6569	614.441	1.73778	0	0	0	0	0.375
1380	58	660	16.2261	15.7734	31.9675	32.9057	1.79743	1.85652	0	0	0	21.2539	685.967	3.1312	0	0	0	0	0.375
1381	58	720	17.9195	17.4964	32.0395	32.9057	2.35458	2.43199	0	0	0	15.6977	710.958	5.15011	0	0	0	0	0.375
1382	58	780	18.5261	18.1053	34.0845	34.9966	2.35458	2.43199	0	0	0	21.2539	685.62	6.09189	0	0	0	0	0.375
1383	58	840	17.9083	17.4964	36.1366	37.0875	2.2589	2.33317	0	0	0	32.6569	616.511	5.59098	0	0	0	0	0.375
1384	58	900	16.1525	15.7734	38.2403	39.1784	2.16323	2.23435	0	0	0	45.6818	502.591	3.76681	0	0	0	0	0.375
1385	58	960	13.5512	13.2299	40.4136	41.2692	2.06756	2.13553	0	0	0	59.2079	362.097	0.966616	0	0	0	0	0.375
1386	58	1020	10.5321	10.2995	42.6918	43.3601	1.97189	2.03672	0	0	0	72.8733	192.914	-2.2964	0	0	0	0	0.375
1387	58	1080	7.60696	7.48139	45.0627	45.451	1.87621	1.9379	0	0	0	86.4945	34.1065	-5.43362	0	0	0	0	0.375
1388	58	1140	6.47887	6.42208	47.3561	47.5419	1.78054	1.83908	0	0	0	90	0.00107894	-6.51776	0	0	0	0	0.375
1389	58	1200	5.83975	5.80703	49.5204	49.6328	1.68487	1.74026	0	0	0	90	0	-7.0889	0	0	0	0	0.375
1390	58	1260	5.35815	5.33552	51.6423	51.7236	1.5892	1.64144	0	0	0	90	0	-7.49833	0	0	0	0	0.375
1391	58	1320	4.99028	4.97405	53.7536	53.8145	1.49352	1.54263	0	0	0	90	0	-7.78461	0	0	0	0	0.375
1392	58	1380	4.70762	4.69693	55.8636	55.9054	1.39785	1.44381	0	0	0	90	0	-7.97723	0	0	0	0	0.375
1393	59	0	4.49185	4.48448	57.9663	57.9963	1.30218	1.34499	0	0	0	90	0	-8.09877	0	0	0	0	0.375
1394	59	60	4.36059	4.35645	62.581	62.5992	1.06603	1.10108	0	0	0	90	0	-7.98226	0	0	0	0	0.375
1395	59	120	4.23068	4.22843	67.1914	67.2021	0.829887	0.85717	0	0	0	90	0	-7.88337	0	0	0	0	0.375
1396	59	180	4.10113	4.1004	71.8013	71.8049	0.59374	0.61326	0	0	0	90	0	-7.79993	0	0	0	0	0.375
1397	59	240	3.97169	3.97238	76.4115	76.4078	0.249492	0.257694	0	0	0	90	0	-7.73014	0	0	0	0	0.375
1398	59	300	3.84232	3.84435	83.0622	83.0503	0.123779	0.127848	0	0	0	90	0.000912054	-7.64813	0	0	0	0	0.375
1399	59	360	3.98984	3.97216	82.9471	83.0503	0.402287	0.415513	0	0	0	86.6475	32.4907	-7.48215	0	0	0	0	0.375
1400	59	420	5.35226	5.22108	77.3787	78.0883	0.680796	0.703178	0	0	0	73.0196	190.231	-6.24018	0	0	0	0	0.375
1401	59	480	7.71658	7.44594	67.779	69.0439	0.959304	0.990842	0	0	0	59.3566	359.338	-4.05291	0	0	0	0	0.375
1402	59	540	10.6371	10.2669	58.5345	59.9994	1.23781	1.27851	0	0	0	45.8457	500.385	-1.22748	0	0	0	0	0.375
1403	59	600	13.6322	13.2023	49.5463	50.955	1.51632	1.56617	0	0	0	32.8593	615.295	1.64131	0	0	0	0	0.375
1404	59	660	16.2044	15.7511	31.9277	32.8661	1.79483	1.85384	0	0	0	21.5405	687.125	3.02701	0	0	0	0	0.375
1405	59	720	17.9019	17.4782	31.9996	32.8661	2.35185	2.42917	0	0	0	16.0734	712.234	5.05406	0	0	0	0	0.375
1406	59	780	18.51	18.0886	34.0446	34.9571	2.35185	2.42917	0	0	0	21.5405	686.782	6.00137	0	0	0	0	0.375
1407	59	840	17.8907	17.4782	36.0968	37.0481	2.25628	2.33046	0	0	0	32.8593	617.347	5.49988	0	0	0	0	0.375
1408	59	900	16.1307	15.7511	38.201	39.1392	2.16072	2.23176	0	0	0	45.8457	502.893	3.66971	0	0	0	0	0.375
1409	59	960	13.5236	13.2023	40.3751	41.2302	2.06516	2.13306	0	0	0	59.3566	361.745	0.860153	0	0	0	0	0.375
1410	59	1020	10.499	10.2669	42.6547	43.3212	1.9696	2.03435	0	0	0	73.0196	191.828	-2.4127	0	0	0	0	0.375
1411	59	1080	7.5706	7.44593	45.0268	45.4122	1.87404	1.93565	0	0	0	86.6475	32.8186	-5.55712	0	0	0	0	0.375
1412	59	1140	6.45405	6.39788	47.3195	47.5032	1.77848	1.83695	0	0	0	90	0.000919889	-6.62852	0	0	0	0	0.375
1413	59	1200	5.81517	5.78279	49.483	49.5942	1.68291	1.73824	0	0	0	90	0	-7.19935	0	0	0	0	0.375
1414	59	1260	5.3334	5.3111	51.605	51.6852	1.58735	1.63954	0	0	0	90	0	-7.60843	0	0	0	0	0.375
1415	59	1320	4.96526	4.94936	53.7166	53.7762	1.49179	1.54084	0	0	0	90	0	-7.8943	0	0	0	0	0.375
1416	59	1380	4.68232	4.67195	55.8267	55.8672	1.39623	1.44213	0	0	0	90	0	-8.08643	0	0	0	0	0.375
1417	60	0	4.46622	4.45921	57.9298	57.9582	1.30067	1.34343	0	0	0	90	0	-8.2074	0	0	0	0	0.375
1418	60	60	4.33475	4.331	62.5391	62.5555	1.06517	1.10019	0	0	0	90	0	-8.08893	0	0	0	0	0.375
1419	60	120	4.20461	4.20278	67.1442	67.1528	0.829667	0.856943	0	0	0	90	0	-7.98823	0	0	0	0	0.375
1420	60	180	4.07481	4.07457	71.7489	71.7501	0.594166	0.6137	0	0	0	90	0	-7.90312	0	0	0	0	0.375
1421	60	240	3.94505	3.94635	76.3544	76.3475	0.249199	0.257392	0	0	0	90	0	-7.83179	0	0	0	0	0.375
1422	60	300	3.8154	3.81814	83.0262	83.0102	0.121581	0.125578	0	0	0	90	0.000777268	-7.74655	0	0	0	0	0.375
1423	60	360	3.9571	3.94077	82.9148	83.0102	0.400019	0.41317	0	0	0	86.8014	31.2194	-7.58627	0	0	0	0	0.375
1424	60	420	5.31449	5.18502	77.4039	78.1047	0.678456	0.700762	0	0	0	73.1672	189.139	-6.34688	0	0	0	0	0.375
1425	60	480	7.67902	7.40936	67.7876	69.0483	0.956894	0.988353	0	0	0	59.5072	358.972	-4.16026	0	0	0	0	0.375
1426	60	540	10.6034	10.2334	58.5277	59.992	1.23533	1.27595	0	0	0	46.0125	500.666	-1.33087	0	0	0	0	0.375
1427	60	600	13.6042	13.174	49.5262	50.9356	1.51377	1.56354	0	0	0	33.0655	616.099	1.54342	0	0	0	0	0.375
1428	60	660	16.1821	15.7284	31.8845	32.8229	1.79221	1.85113	0	0	0	21.8311	688.232	2.92142	0	0	0	0	0.375
1429	60	720	17.8838	17.4596	31.9563	32.8229	2.34908	2.42631	0	0	0	16.4511	713.459	4.95678	0	0	0	0	0.375
1430	60	780	18.4936	18.0716	34.0012	34.914	2.34908	2.42631	0	0	0	21.8311	687.892	5.90972	0	0	0	0	0.375
1431	60	840	17.8726	17.4596	36.0536	37.0052	2.25363	2.32772	0	0	0	33.0655	618.134	5.40762	0	0	0	0	0.375
1432	60	900	16.1082	15.7284	38.1581	39.0963	2.15818	2.22914	0	0	0	46.0125	503.151	3.5713	0	0	0	0	0.375
1433	60	960	13.4952	13.174	40.3331	41.1874	2.06273	2.13055	0	0	0	59.5072	361.353	0.752134	0	0	0	0	0.375
1434	60	1020	10.4649	10.2334	42.6141	43.2786	1.96729	2.03196	0	0	0	73.1672	190.71	-2.53081	0	0	0	0	0.375
1435	60	1080	7.5331	7.40936	44.9875	45.3697	1.87184	1.93338	0	0	0	86.8014	31.5314	-5.68268	0	0	0	0	0.375
1436	60	1140	6.42806	6.37253	47.2794	47.4608	1.77639	1.83479	0	0	0	90	0.000783867	-6.74129	0	0	0	0	0.375
1437	60	1200	5.78936	5.75734	49.4421	49.552	1.68094	1.7362	0	0	0	90	0	-7.31188	0	0	0	0	0.375
1438	60	1260	5.30739	5.28541	51.5642	51.6431	1.58549	1.63761	0	0	0	90	0	-7.72066	0	0	0	0	0.375
1439	60	1320	4.93893	4.92338	53.676	53.7343	1.49004	1.53903	0	0	0	90	0	-8.00615	0	0	0	0	0.375
1440	60	1380	4.65568	4.64565	55.7862	55.8254	1.39459	1.44044	0	0	0	90	0	-8.19782	0	0	0	0	0.375
1441	61	0	4.43923	4.4326	57.8896	57.9165	1.29914	1.34185	0	0	0	90	0	-8.31824	0	0	0	0	0.375
1442	61	60	4.30753	4.30417	62.4935	62.5083	1.06429	1.09928	0	0	0	90	0	-8.1978	0	0	0	0	0.375
1443	61	120	4.17714	4.17575	67.0935	67.1	0.829433	0.856701	0	0	0	90	0	-8.09531	0	0	0	0	0.375
1444	61	180	4.04708	4.04733	71.693	71.6917	0.594579	0.614126	0	0	0	90	0	-8.00853	0	0	0	0	0.375
1445	61	240	3.91699	3.91891	76.2938	76.2835	0.248903	0.257086	0	0	0	90	0	-7.93566	0	0	0	0	0.375
1446	61	300	3.78703	3.79049	82.9863	82.966	0.119377	0.123301	0	0	0	90	0.000662079	-7.84702	0	0	0	0	0.375
1447	61	360	3.92295	3.90797	82.8786	82.966	0.397742	0.410818	0	0	0	86.9562	29.9501	-7.69243	0	0	0	0	0.375
1448	61	420	5.27533	5.14759	77.4255	78.1173	0.676107	0.698335	0	0	0	73.3162	188.013	-6.45555	0	0	0	0	0.375
1449	61	480	7.64019	7.37156	67.7926	69.0489	0.954472	0.985851	0	0	0	59.6599	358.563	-4.26943	0	0	0	0	0.375
1450	61	540	10.5685	10.1988	58.5173	59.9806	1.23284	1.27337	0	0	0	46.182	500.896	-1.43587	0	0	0	0	0.375
1451	61	600	13.5753	13.1449	49.5025	50.9123	1.5112	1.56088	0	0	0	33.2754	616.848	1.44416	0	0	0	0	0.375
1452	61	660	16.1593	15.7051	31.8374	32.7756	1.78957	1.8484	0	0	0	22.1257	689.279	2.8145	0	0	0	0	0.375
1453	61	720	17.8653	17.4406	31.9091	32.7756	2.3463	2.42343	0	0	0	16.8306	714.623	4.85838	0	0	0	0	0.375
1454	61	780	18.4767	18.0542	33.954	34.8668	2.3463	2.42343	0	0	0	22.1257	688.943	5.81705	0	0	0	0	0.375
1455	61	840	17.8541	17.4406	36.0065	36.9581	2.25096	2.32496	0	0	0	33.2754	618.865	5.3143	0	0	0	0	0.375
1456	61	900	16.0852	15.7051	38.1114	39.0494	2.15562	2.22649	0	0	0	46.182	503.357	3.47166	0	0	0	0	0.375
1457	61	960	13.4661	13.1449	40.2872	41.1406	2.06029	2.12802	0	0	0	59.6599	360.917	0.642627	0	0	0	0	0.375
1458	61	1020	10.4298	10.1988	42.5695	43.2319	1.96495	2.02955	0	0	0	73.3162	189.559	-2.6507	0	0	0	0	0.375
1459	61	1080	7.49435	7.37156	44.9441	45.3232	1.86962	1.93108	0	0	0	86.9562	30.2463	-5.81024	0	0	0	0	0.375
1460	61	1140	6.40081	6.34593	47.2353	47.4144	1.77428	1.83261	0	0	0	90	0.000667635	-6.85605	0	0	0	0	0.375
1461	61	1200	5.76222	5.73056	49.3972	49.5057	1.67894	1.73414	0	0	0	90	0	-7.42645	0	0	0	0	0.375
1462	61	1260	5.27998	5.25834	51.5193	51.597	1.58361	1.63567	0	0	0	90	0	-7.83499	0	0	0	0	0.375
1463	61	1320	4.91116	4.89597	53.6313	53.6883	1.48827	1.5372	0	0	0	90	0	-8.12014	0	0	0	0	0.375
1464	61	1380	4.62757	4.61789	55.7417	55.7795	1.39294	1.43873	0	0	0	90	0	-8.31137	0	0	0	0	0.375
1465	62	0	4.41074	4.40449	57.8454	57.8708	1.2976	1.34026	0	0	0	90	0	-8.43127	0	0	0	0	0.375
1466	62	60	4.27881	4.27585	62.444	62.4569	1.06339	1.09835	0	0	0	90	0	-8.30887	0	0	0	0	0.375
1467	62	120	4.14815	4.14721	67.0386	67.0431	0.829186	0.856447	0	0	0	90	0	-8.20458	0	0	0	0	0.375
1468	62	180	4.0178	4.01857	71.6331	71.6292	0.59498	0.61454	0	0	0	90	0	-8.11616	0	0	0	0	0.375
1469	62	240	3.88737	3.88993	76.2291	76.2153	0.248606	0.256779	0	0	0	90	0	-8.04176	0	0	0	0	0.375
1470	62	300	3.75708	3.76128	82.9418	82.9173	0.117167	0.121019	0	0	0	90	0.000563715	-7.94955	0	0	0	0	0.375
1471	62	360	3.89739	3.87364	82.7788	82.9173	0.395458	0.408459	0	0	0	87.1118	28.6842	-7.80064	0	0	0	0	0.375
1472	62	420	5.23637	5.10868	77.4339	78.1257	0.673749	0.6959	0	0	0	73.4666	186.852	-6.56617	0	0	0	0	0.375
1473	62	480	7.59982	7.33244	67.7943	69.0453	0.95204	0.98334	0	0	0	59.8145	358.107	-4.38042	0	0	0	0	0.375
1474	62	540	10.5324	10.1632	58.5037	59.9649	1.23033	1.27078	0	0	0	46.3542	501.07	-1.54244	0	0	0	0	0.375
1475	62	600	13.5454	13.115	49.4751	50.8845	1.50862	1.55822	0	0	0	33.4889	617.534	1.34359	0	0	0	0	0.375
1476	62	660	16.1357	15.6812	31.7863	32.7238	1.78691	1.84566	0	0	0	22.4242	690.259	2.70636	0	0	0	0	0.375
1477	62	720	17.8463	17.4212	31.8578	32.7238	2.3435	2.42054	0	0	0	17.212	715.717	4.75895	0	0	0	0	0.375
1478	62	780	18.4595	18.0364	33.9026	34.8152	2.3435	2.42054	0	0	0	22.4242	689.927	5.72345	0	0	0	0	0.375
1479	62	840	17.8351	17.4212	35.9552	36.9066	2.24827	2.32219	0	0	0	33.4889	619.532	5.22	0	0	0	0	0.375
1480	62	900	16.0615	15.6812	38.0606	38.998	2.15305	2.22384	0	0	0	46.3542	503.507	3.37086	0	0	0	0	0.375
1481	62	960	13.436	13.115	40.2371	41.0894	2.05783	2.12548	0	0	0	59.8145	360.434	0.531702	0	0	0	0	0.375
1482	62	1020	10.3936	10.1632	42.5208	43.1808	1.96261	2.02713	0	0	0	73.4666	188.373	-2.77229	0	0	0	0	0.375
1483	62	1080	7.45424	7.33243	44.8964	45.2722	1.86738	1.92878	0	0	0	87.1118	28.9651	-5.93976	0	0	0	0	0.375
1484	62	1140	6.37215	6.31797	47.1868	47.3636	1.77216	1.83042	0	0	0	90	0.00056839	-6.97274	0	0	0	0	0.375
1485	62	1200	5.7336	5.70235	49.3479	49.455	1.67694	1.73207	0	0	0	90	0	-7.54305	0	0	0	0	0.375
1486	62	1260	5.25104	5.22977	51.4701	51.5464	1.58172	1.63372	0	0	0	90	0	-7.95139	0	0	0	0	0.375
1487	62	1320	4.88183	4.86701	53.5823	53.6378	1.4865	1.53537	0	0	0	90	0	-8.23624	0	0	0	0	0.375
1488	62	1380	4.59786	4.58855	55.6928	55.7291	1.39127	1.43701	0	0	0	90	0	-8.42707	0	0	0	0	0.375
1489	63	0	4.38063	4.37479	57.7969	57.8205	1.29605	1.33866	0	0	0	90	0	-8.54648	0	0	0	0	0.375
1490	63	60	4.24843	4.24591	62.39	62.4011	1.06249	1.09742	0	0	0	90	0	-8.42213	0	0	0	0	0.375
1491	63	120	4.11749	4.11703	66.9794	66.9816	0.828931	0.856183	0	0	0	90	0	-8.31606	0	0	0	0	0.375
1492	63	180	3.98685	3.98815	71.5687	71.5621	0.595371	0.614945	0	0	0	90	0	-8.226	0	0	0	0	0.375
1493	63	240	3.85603	3.85927	76.16	76.1426	0.248308	0.256472	0	0	0	90	0	-8.1501	0	0	0	0	0.375
1494	63	300	3.7254	3.73039	82.8926	82.8635	0.114953	0.118732	0	0	0	90	0.000479776	-8.05415	0	0	0	0	0.375
1495	63	360	3.85965	3.83766	82.7353	82.8635	0.39317	0.406096	0	0	0	87.2682	27.4236	-7.91092	0	0	0	0	0.375
1496	63	420	5.19401	5.06817	77.4472	78.1293	0.671387	0.69346	0	0	0	73.6182	185.654	-6.67877	0	0	0	0	0.375
1497	63	480	7.55813	7.29188	67.7909	69.0369	0.949604	0.980823	0	0	0	59.971	357.599	-4.49322	0	0	0	0	0.375
1498	63	540	10.4952	10.1264	58.4848	59.9444	1.22782	1.26819	0	0	0	46.5291	501.181	-1.65056	0	0	0	0	0.375
1499	63	600	13.5147	13.0842	49.4428	50.852	1.50604	1.55555	0	0	0	33.7061	618.148	1.24177	0	0	0	0	0.375
1500	63	660	16.1122	15.6567	31.7291	32.6672	1.78425	1.84291	0	0	0	22.7263	692.651	2.59708	0	0	0	0	0.375
1501	63	720	17.827	17.4014	31.8015	32.6672	2.34069	2.41764	0	0	0	17.595	716.425	4.65858	0	0	0	0	0.375
1502	63	780	18.4424	18.0183	33.8452	34.7587	2.34069	2.41764	0	0	0	22.7263	692.321	5.62902	0	0	0	0	0.375
1503	63	840	17.816	17.4014	35.8986	36.8502	2.24558	2.31941	0	0	0	33.7061	620.129	5.12482	0	0	0	0	0.375
1504	63	900	16.0373	15.6567	38.0048	38.9417	2.15047	2.22117	0	0	0	46.5291	503.595	3.26899	0	0	0	0	0.375
1505	63	960	13.4052	13.0842	40.1821	41.0332	2.05536	2.12294	0	0	0	59.971	359.9	0.419426	0	0	0	0	0.375
1506	63	1020	10.3562	10.1264	42.4671	43.1247	1.96026	2.0247	0	0	0	73.6182	187.15	-2.89555	0	0	0	0	0.375
1507	63	1080	7.41272	7.29188	44.8438	45.2163	1.86515	1.92647	0	0	0	87.2682	27.6894	-6.0712	0	0	0	0	0.375
1508	63	1140	6.34204	6.28852	47.1333	47.3078	1.77004	1.82823	0	0	0	90	0.000483709	-7.09135	0	0	0	0	0.375
1509	63	1200	5.70346	5.67257	49.2936	49.3993	1.67493	1.73	0	0	0	90	0	-7.66163	0	0	0	0	0.375
1510	63	1260	5.22051	5.19959	51.4158	51.4908	1.57982	1.63176	0	0	0	90	0	-8.06985	0	0	0	0	0.375
1511	63	1320	4.85084	4.83639	53.5283	53.5823	1.48471	1.53353	0	0	0	90	0	-8.35444	0	0	0	0	0.375
1512	63	1380	4.56647	4.5575	55.6389	55.6738	1.38961	1.43529	0	0	0	90	0	-8.54491	0	0	0	0	0.375
1513	64	0	4.3488	4.34335	57.7432	57.7653	1.2945	1.33706	0	0	0	90	0	-8.66384	0	0	0	0	0.375
1514	64	60	4.21632	4.21421	62.331	62.3402	1.06158	1.09648	0	0	0	90	0	-8.53757	0	0	0	0	0.375
1515	64	120	4.08508	4.08508	66.9151	66.9151	0.828669	0.855913	0	0	0	90	0	-8.42973	0	0	0	0	0.375
1516	64	180	3.95413	3.95594	71.4991	71.49	0.595755	0.615341	0	0	0	90	0	-8.33806	0	0	0	0	0.375
1517	64	240	3.82293	3.82681	76.0857	76.0649	0.248011	0.256164	0	0	0	90	0	-8.26067	0	0	0	0	0.375
1518	64	300	3.69193	3.69768	82.8377	82.8041	0.112735	0.116442	0	0	0	90	0.000408196	-8.16085	0	0	0	0	0.375
1519	64	360	3.82015	3.79988	82.686	82.8041	0.390879	0.403729	0	0	0	87.4254	26.1701	-8.02327	0	0	0	0	0.375
1520	64	420	5.14992	5.02594	77.4553	78.1276	0.669022	0.691017	0	0	0	73.7712	184.418	-6.79334	0	0	0	0	0.375
1521	64	480	7.51487	7.2498	67.7825	69.0232	0.947166	0.978305	0	0	0	60.1293	357.036	-4.6078	0	0	0	0	0.375
1522	64	540	10.4567	10.0883	58.4609	59.9187	1.22531	1.26559	0	0	0	46.7067	501.225	-1.7602	0	0	0	0	0.375
1523	64	600	13.483	13.0524	49.4055	50.8142	1.50345	1.55288	0	0	0	33.9267	618.686	1.13874	0	0	0	0	0.375
1524	64	660	16.0873	15.6315	31.6682	32.6053	1.7816	1.84017	0	0	0	23.0319	693.478	2.48676	0	0	0	0	0.375
1525	64	720	17.807	17.3811	31.7405	32.6053	2.33788	2.41474	0	0	0	17.9796	717.356	4.55738	0	0	0	0	0.375
1526	64	780	18.4243	17.9998	33.7841	34.6969	2.33788	2.41474	0	0	0	23.0319	693.151	5.53385	0	0	0	0	0.375
1527	64	840	17.796	17.3811	35.8376	36.7885	2.24289	2.31663	0	0	0	33.9267	620.649	5.02884	0	0	0	0	0.375
1528	64	900	16.0123	15.6315	37.9441	38.8802	2.14789	2.21851	0	0	0	46.7067	503.615	3.16613	0	0	0	0	0.375
1529	64	960	13.3732	13.0524	40.1222	40.9718	2.0529	2.12039	0	0	0	60.1293	359.311	0.305866	0	0	0	0	0.375
1530	64	1020	10.3174	10.0883	42.4084	43.0634	1.95791	2.02228	0	0	0	73.7712	185.889	-3.0204	0	0	0	0	0.375
1531	64	1080	7.36963	7.2498	44.786	45.155	1.86291	1.92416	0	0	0	87.4254	26.4213	-6.20452	0	0	0	0	0.375
1532	64	1140	6.31032	6.2575	47.0746	47.2466	1.76792	1.82604	0	0	0	90	0.000411504	-7.21182	0	0	0	0	0.375
1533	64	1200	5.67162	5.64112	49.234	49.3382	1.67292	1.72792	0	0	0	90	0	-7.78217	0	0	0	0	0.375
1534	64	1260	5.18823	5.16767	51.3563	51.4299	1.57793	1.62981	0	0	0	90	0	-8.19032	0	0	0	0	0.375
1535	64	1320	4.81806	4.80399	53.4689	53.5215	1.48294	1.53169	0	0	0	90	0	-8.47471	0	0	0	0	0.375
1536	64	1380	4.53323	4.52463	55.5796	55.6131	1.38794	1.43357	0	0	0	90	0	-8.66485	0	0	0	0	0.375
1537	65	0	4.3151	4.31005	57.6843	57.7047	1.29295	1.33545	0	0	0	90	0	-8.78334	0	0	0	0	0.375
1538	65	60	4.18233	4.18064	62.2665	62.2739	1.06068	1.09555	0	0	0	90	0	-8.65517	0	0	0	0	0.375
1539	65	120	4.05077	4.05124	66.8453	66.8431	0.828404	0.855639	0	0	0	90	0	-8.5456	0	0	0	0	0.375
1540	65	180	3.91948	3.92183	71.4241	71.4123	0.596133	0.615732	0	0	0	90	0	-8.45234	0	0	0	0	0.375
1541	65	240	3.78787	3.79242	76.0059	75.9815	0.247714	0.255858	0	0	0	90	0	-8.37349	0	0	0	0	0.375
1542	65	300	3.65649	3.66302	82.7768	82.7387	0.110515	0.114148	0	0	0	90	0.000347193	-8.26964	0	0	0	0	0.375
1543	65	360	3.77296	3.76019	82.6642	82.7387	0.388586	0.401362	0	0	0	87.5832	19.976	-8.13771	0	0	0	0	0.375
1544	65	420	5.10096	4.98186	77.4741	78.1202	0.666658	0.688575	0	0	0	73.9253	183.142	-6.90988	0	0	0	0	0.375
1545	65	480	7.46917	7.20608	67.7721	69.0037	0.94473	0.975789	0	0	0	60.2896	356.415	-4.72418	0	0	0	0	0.375
1546	65	540	10.4165	10.0489	58.4329	59.8873	1.2228	1.263	0	0	0	46.8868	501.196	-1.87131	0	0	0	0	0.375
1547	65	600	13.4501	13.0197	49.3635	50.7708	1.50087	1.55022	0	0	0	34.1507	619.139	1.03456	0	0	0	0	0.375
1548	65	660	16.0615	15.6056	31.6022	32.5378	1.77894	1.83743	0	0	0	23.3409	694.213	2.37547	0	0	0	0	0.375
1549	65	720	17.7864	17.3603	31.6743	32.5378	2.33509	2.41186	0	0	0	18.3656	718.193	4.45544	0	0	0	0	0.375
1550	65	780	18.4057	17.9809	33.7177	34.6295	2.33509	2.41186	0	0	0	23.3409	693.89	5.43804	0	0	0	0	0.375
1551	65	840	17.7754	17.3603	35.7714	36.7212	2.24021	2.31386	0	0	0	34.1507	621.084	4.93216	0	0	0	0	0.375
1552	65	900	15.9865	15.6056	37.8782	38.8129	2.14533	2.21586	0	0	0	46.8868	503.563	3.06236	0	0	0	0	0.375
1553	65	960	13.3402	13.0197	40.0569	40.9046	2.05045	2.11786	0	0	0	60.2896	358.663	0.19109	0	0	0	0	0.375
1554	65	1020	10.2773	10.0489	42.3442	42.9963	1.95557	2.01986	0	0	0	73.9253	184.589	-3.1468	0	0	0	0	0.375
1555	65	1080	7.32281	7.20607	44.729	45.088	1.86069	1.92186	0	0	0	87.5832	20.1658	-6.33968	0	0	0	0	0.375
1556	65	1140	6.27586	6.22477	47.0136	47.1797	1.7658	1.82386	0	0	0	90	0.000349974	-7.33413	0	0	0	0	0.375
1557	65	1200	5.63774	5.60789	49.1695	49.2714	1.67092	1.72586	0	0	0	90	0	-7.90464	0	0	0	0	0.375
1558	65	1260	5.15396	5.13389	51.2914	51.3631	1.57604	1.62786	0	0	0	90	0	-8.31278	0	0	0	0	0.375
1559	65	1320	4.78326	4.76967	53.4041	53.4548	1.48116	1.52986	0	0	0	90	0	-8.59703	0	0	0	0	0.375
1560	65	1380	4.49799	4.48981	55.5147	55.5465	1.38628	1.43186	0	0	0	90	0	-8.78689	0	0	0	0	0.375
1561	66	0	4.27935	4.27477	57.6198	57.6382	1.2914	1.33386	0	0	0	90	0	-8.90497	0	0	0	0	0.375
1562	66	60	4.14628	4.14508	62.1965	62.2017	1.05977	1.09461	0	0	0	90	0	-8.77493	0	0	0	0	0.375
1563	66	120	4.01439	4.01538	66.7698	66.7652	0.828139	0.855365	0	0	0	90	0	-8.66366	0	0	0	0	0.375
1564	66	180	3.88275	3.88568	71.3434	71.3286	0.596507	0.616118	0	0	0	90	0	-8.56884	0	0	0	0	0.375
1565	66	240	3.7507	3.75598	75.9204	75.8921	0.24742	0.255554	0	0	0	90	0	-8.48857	0	0	0	0	0.375
1566	66	300	3.61889	3.62628	82.7097	82.6666	0.108292	0.111852	0	0	0	90	0.000295233	-8.38056	0	0	0	0	0.375
1567	66	360	3.72937	3.71845	82.603	82.6666	0.386295	0.398995	0	0	0	87.7417	18.7252	-8.25426	0	0	0	0	0.375
1568	66	420	5.05293	4.93582	77.471	78.1065	0.664297	0.686137	0	0	0	74.0806	181.825	-7.02842	0	0	0	0	0.375
1569	66	480	7.42238	7.16062	67.7527	68.9781	0.9423	0.973279	0	0	0	60.4516	355.731	-4.84232	0	0	0	0	0.375
1570	66	540	10.3751	10.0081	58.3981	59.8496	1.2203	1.26042	0	0	0	47.0695	501.088	-1.98389	0	0	0	0	0.375
1571	66	600	13.4162	12.9859	49.3153	50.7212	1.4983	1.54756	0	0	0	34.378	619.501	0.929288	0	0	0	0	0.375
1572	66	660	16.0351	15.579	31.5304	32.4643	1.77631	1.83471	0	0	0	23.6531	694.849	2.26331	0	0	0	0	0.375
1573	66	720	17.7653	17.339	31.6022	32.4643	2.33231	2.40899	0	0	0	18.7529	718.929	4.35285	0	0	0	0	0.375
1574	66	780	18.3865	17.9615	33.6455	34.5561	2.33231	2.40899	0	0	0	23.6531	694.529	5.34168	0	0	0	0	0.375
1575	66	840	17.7543	17.339	35.6992	36.6478	2.23754	2.31111	0	0	0	34.378	621.428	4.83486	0	0	0	0	0.375
1576	66	900	15.9599	15.579	37.8063	38.7396	2.14278	2.21322	0	0	0	47.0695	503.431	2.95775	0	0	0	0	0.375
1577	66	960	13.3061	12.9859	39.9857	40.8314	2.04801	2.11534	0	0	0	60.4516	357.954	0.0751636	0	0	0	0	0.375
1578	66	1020	10.2357	10.0081	42.2741	42.9231	1.95324	2.01746	0	0	0	74.0806	183.248	-3.2747	0	0	0	0	0.375
1579	66	1080	7.2763	7.16061	44.6595	45.0149	1.85847	1.91957	0	0	0	87.7417	18.9014	-6.47664	0	0	0	0	0.375
1580	66	1140	6.24062	6.19024	46.943	47.1066	1.76371	1.82169	0	0	0	90	0.00029757	-7.45824	0	0	0	0	0.375
1581	66	1200	5.60219	5.57276	49.098	49.1984	1.66894	1.72381	0	0	0	90	0	-8.02899	0	0	0	0	0.375
1582	66	1260	5.11783	5.09814	51.2198	51.2902	1.57417	1.62592	0	0	0	90	0	-8.43722	0	0	0	0	0.375
1583	66	1320	4.74652	4.73333	53.3327	53.3819	1.4794	1.52804	0	0	0	90	0	-8.72138	0	0	0	0	0.375
1584	66	1380	4.46072	4.45292	55.4434	55.4737	1.38463	1.43016	0	0	0	90	0	-8.911	0	0	0	0	0.375
1585	67	0	4.24155	4.23739	57.5487	57.5654	1.28987	1.33227	0	0	0	90	0	-9.02872	0	0	0	0	0.375
1586	67	60	4.10814	4.10738	62.1198	62.1231	1.05887	1.09368	0	0	0	90	0	-8.89684	0	0	0	0	0.375
1587	67	120	3.97589	3.97737	66.6877	66.6808	0.827875	0.855093	0	0	0	90	0	-8.78391	0	0	0	0	0.375
1588	67	180	3.84388	3.84736	71.256	71.2385	0.59688	0.616503	0	0	0	90	0	-8.68757	0	0	0	0	0.375
1589	67	240	3.71137	3.71735	75.8281	75.7962	0.247128	0.255253	0	0	0	90	0	-8.60592	0	0	0	0	0.375
1590	67	300	3.57913	3.58734	82.6353	82.5874	0.106068	0.109555	0	0	0	90	0.000250998	-8.49361	0	0	0	0	0.375
1591	67	360	3.68365	3.67453	82.5343	82.5874	0.384005	0.39663	0	0	0	87.9007	17.4887	-8.37293	0	0	0	0	0.375
1592	67	420	5.00282	4.8877	77.4612	78.086	0.661942	0.683704	0	0	0	74.237	180.466	-7.14896	0	0	0	0	0.375
1593	67	480	7.37371	7.11331	67.7267	68.9457	0.939879	0.970779	0	0	0	60.6153	354.982	-4.96224	0	0	0	0	0.375
1594	67	540	10.3321	9.96578	58.3569	59.8054	1.21782	1.25785	0	0	0	47.2547	500.897	-2.09788	0	0	0	0	0.375
1595	67	600	13.3811	12.9509	49.2608	50.665	1.49575	1.54493	0	0	0	34.6085	619.765	0.822963	0	0	0	0	0.375
1596	67	660	16.0077	15.5515	31.4524	32.3844	1.77369	1.832	0	0	0	23.9684	695.38	2.15038	0	0	0	0	0.375
1597	67	720	17.7436	17.3171	31.524	32.3844	2.32956	2.40615	0	0	0	19.1415	719.556	4.24971	0	0	0	0	0.375
1598	67	780	18.3669	17.9417	33.5672	34.4762	2.32956	2.40615	0	0	0	23.9684	695.063	5.24486	0	0	0	0	0.375
1599	67	840	17.7326	17.3171	35.621	36.568	2.23491	2.30838	0	0	0	34.6085	621.675	4.73703	0	0	0	0	0.375
1600	67	900	15.9324	15.5515	37.7283	38.6597	2.14025	2.21061	0	0	0	47.2547	503.217	2.85239	0	0	0	0	0.375
1601	67	960	13.2708	12.9509	39.9082	40.7515	2.04559	2.11285	0	0	0	60.6153	357.179	-0.041847	0	0	0	0	0.375
1602	67	1020	10.1926	9.96578	42.1976	42.8433	1.95094	2.01508	0	0	0	74.237	181.865	-3.40405	0	0	0	0	0.375
1603	67	1080	7.22793	7.11331	44.5835	44.9351	1.85628	1.91731	0	0	0	87.9007	17.6517	-6.61535	0	0	0	0	0.375
1604	67	1140	6.20345	6.1538	46.8659	47.0269	1.76163	1.81954	0	0	0	90	0.000252963	-7.58412	0	0	0	0	0.375
1605	67	1200	5.56462	5.53561	49.0199	49.1187	1.66697	1.72177	0	0	0	90	0	-8.15522	0	0	0	0	0.375
1606	67	1260	5.0796	5.0603	51.1417	51.2105	1.57231	1.62401	0	0	0	90	0	-8.56359	0	0	0	0	0.375
1607	67	1320	4.70763	4.69484	53.2546	53.3023	1.47766	1.52624	0	0	0	90	0	-8.84773	0	0	0	0	0.375
1608	67	1380	4.42125	4.41384	55.3654	55.3941	1.383	1.42847	0	0	0	90	0	-9.03717	0	0	0	0	0.375
1609	68	0	4.20152	4.19778	57.4708	57.4859	1.28835	1.3307	0	0	0	90	0	-9.15456	0	0	0	0	0.375
1610	68	60	4.06775	4.06744	62.0364	62.0377	1.05798	1.09276	0	0	0	90	0	-9.02089	0	0	0	0	0.375
1611	68	120	3.93513	3.9371	66.5988	66.5895	0.827617	0.854826	0	0	0	90	0	-8.90634	0	0	0	0	0.375
1612	68	180	3.80272	3.80675	71.1616	71.1414	0.597252	0.616888	0	0	0	90	0	-8.80853	0	0	0	0	0.375
1613	68	240	3.66974	3.67641	75.7288	75.6932	0.24684	0.254955	0	0	0	90	0	-8.72553	0	0	0	0	0.375
1614	68	300	3.53703	3.54606	82.5533	82.5006	0.103843	0.107257	0	0	0	90	0.000213357	-8.60881	0	0	0	0	0.375
1615	68	360	3.63557	3.62831	82.4584	82.5006	0.381719	0.394269	0	0	0	87.7861	18.4874	-8.49374	0	0	0	0	0.375
1616	68	420	4.95021	4.83737	77.4457	78.0583	0.659595	0.68128	0	0	0	74.3945	179.063	-7.2715	0	0	0	0	0.375
1617	68	480	7.32299	7.06405	67.6942	68.9061	0.937471	0.968292	0	0	0	60.7807	354.164	-5.08391	0	0	0	0	0.375
1618	68	540	10.2875	9.92188	58.3091	59.754	1.21535	1.2553	0	0	0	47.4422	500.616	-2.21328	0	0	0	0	0.375
1619	68	600	13.3447	12.9148	49.1998	50.6019	1.49322	1.54231	0	0	0	34.8422	619.925	0.715642	0	0	0	0	0.375
1620	68	660	15.9795	15.5233	31.368	32.2976	1.7711	1.82933	0	0	0	24.2866	695.796	2.03674	0	0	0	0	0.375
1621	68	720	17.7212	17.2947	31.4393	32.2976	2.32685	2.40335	0	0	0	19.5312	720.066	4.14611	0	0	0	0	0.375
1622	68	780	18.3467	17.9214	33.4824	34.3894	2.32685	2.40335	0	0	0	24.2866	695.483	5.14768	0	0	0	0	0.375
1623	68	840	17.7102	17.2947	35.5361	36.4812	2.2323	2.30569	0	0	0	34.8422	621.818	4.63876	0	0	0	0	0.375
1624	68	900	15.9041	15.5233	37.6437	38.573	2.13776	2.20804	0	0	0	47.4422	502.914	2.74635	0	0	0	0	0.375
1625	68	960	13.2343	12.9148	39.8241	40.6648	2.04321	2.11039	0	0	0	60.7807	356.335	-0.159875	0	0	0	0	0.375
1626	68	1020	10.1478	9.92188	42.1144	42.7566	1.94867	2.01273	0	0	0	74.3945	180.439	-3.53478	0	0	0	0	0.375
1627	68	1080	7.17739	7.06405	44.5012	44.8484	1.85412	1.91508	0	0	0	87.7861	18.6581	-6.75578	0	0	0	0	0.375
1628	68	1140	6.16419	6.11532	46.7819	46.9402	1.75957	1.81742	0	0	0	90	0.000215009	-7.71173	0	0	0	0	0.375
1629	68	1200	5.5249	5.49634	48.9348	49.032	1.66503	1.71977	0	0	0	90	0	-8.28327	0	0	0	0	0.375
1630	68	1260	5.04148	5.02025	51.0481	51.1238	1.57048	1.62211	0	0	0	90	0	-8.69188	0	0	0	0	0.375
1631	68	1320	4.66378	4.65408	53.1794	53.2155	1.47594	1.52446	0	0	0	90	0	-8.97607	0	0	0	0	0.375
1632	68	1380	4.38242	4.37244	55.2686	55.3073	1.38139	1.42681	0	0	0	90	0	-9.16537	0	0	0	0	0.375
1633	69	0	4.15598	4.15582	57.3985	57.3991	1.28685	1.32915	0	0	0	90	0	-9.28248	0	0	0	0	0.375
1634	69	60	4.02467	4.02512	61.947	61.945	1.05711	1.09186	0	0	0	90	0	-9.14707	0	0	0	0	0.375
1635	69	120	3.89193	3.89442	66.5026	66.4909	0.827366	0.854567	0	0	0	90	0	-9.03095	0	0	0	0	0.375
1636	69	180	3.75918	3.76372	71.0596	71.0368	0.597627	0.617275	0	0	0	90	0	-8.93172	0	0	0	0	0.375
1637	69	240	3.62565	3.63302	75.622	75.5827	0.246557	0.254663	0	0	0	90	0	-8.84742	0	0	0	0	0.375
1638	69	300	3.49243	3.50232	82.4633	82.4057	0.101619	0.10496	0	0	0	90	0.00018134	-8.72617	0	0	0	0	0.375
1639	69	360	3.58519	3.57966	82.3736	82.4057	0.379439	0.391914	0	0	0	87.9262	17.3998	-8.61669	0	0	0	0	0.375
1640	69	420	4.89548	4.78471	77.4213	78.0227	0.657259	0.678868	0	0	0	74.553	177.617	-7.39605	0	0	0	0	0.375
1641	69	480	7.27018	7.01274	67.6542	68.8589	0.935079	0.965821	0	0	0	60.9478	353.274	-5.20734	0	0	0	0	0.375
1642	69	540	10.2435	9.87631	58.2451	59.6951	1.2129	1.25278	0	0	0	47.6322	504.478	-2.33004	0	0	0	0	0.375
1643	69	600	13.3081	12.8774	49.1283	50.5313	1.49072	1.53973	0	0	0	35.0789	619.974	0.607377	0	0	0	0	0.375
1644	69	660	15.9506	15.4942	31.2761	32.2037	1.76854	1.82668	0	0	0	24.6076	696.092	1.92251	0	0	0	0	0.375
1645	69	720	17.6982	17.2716	31.3475	32.2037	2.32418	2.40059	0	0	0	19.9219	720.452	4.04215	0	0	0	0	0.375
1646	69	780	18.326	17.9006	33.3905	34.2954	2.32418	2.40059	0	0	0	24.6076	695.782	5.05023	0	0	0	0	0.375
1647	69	840	17.6873	17.2716	35.4443	36.3872	2.22974	2.30305	0	0	0	35.0789	621.85	4.54013	0	0	0	0	0.375
1648	69	900	15.8767	15.4942	37.5476	38.4789	2.13531	2.20551	0	0	0	47.6322	506.773	2.63971	0	0	0	0	0.375
1649	69	960	13.1973	12.8774	39.7307	40.5707	2.04087	2.10796	0	0	0	60.9478	355.42	-0.278855	0	0	0	0	0.375
1650	69	1020	10.1016	9.8763	42.0233	42.6624	1.94643	2.01042	0	0	0	74.553	178.969	-3.66685	0	0	0	0	0.375
1651	69	1080	7.12506	7.01274	44.4107	44.7542	1.85199	1.91288	0	0	0	87.9262	17.559	-6.89788	0	0	0	0	0.375
1652	69	1140	6.12291	6.07471	46.6901	46.8459	1.75756	1.81534	0	0	0	90	0.000182729	-7.84102	0	0	0	0	0.375
1653	69	1200	5.48301	5.45482	48.8419	48.9377	1.66312	1.7178	0	0	0	90	0	-8.41312	0	0	0	0	0.375
1654	69	1260	4.99861	4.97788	50.9557	51.0294	1.56868	1.62025	0	0	0	90	0	-8.82206	0	0	0	0	0.375
1655	69	1320	4.62044	4.61093	53.0858	53.1212	1.47424	1.52271	0	0	0	90	0	-9.10636	0	0	0	0	0.375
1656	69	1380	4.33804	4.3286	55.1764	55.2129	1.37981	1.42517	0	0	0	90	0	-9.29559	0	0	0	0	0.375
1657	70	0	4.11136	4.11138	57.3048	57.3047	1.28537	1.32763	0	0	0	90	0	-9.41247	0	0	0	0	0.375
1658	70	60	3.97946	3.9803	61.8482	61.8446	1.05625	1.09097	0	0	0	90	0	-9.27537	0	0	0	0	0.375
1659	70	120	3.84628	3.84922	66.3982	66.3845	0.827127	0.85432	0	0	0	90	0	-9.15773	0	0	0	0	0.375
1660	70	180	3.71308	3.71815	70.9496	70.9243	0.598006	0.617667	0	0	0	90	0	-9.05713	0	0	0	0	0.375
1661	70	240	3.57904	3.58707	75.5069	75.4642	0.246279	0.254376	0	0	0	90	0	-8.9716	0	0	0	0	0.375
1662	70	300	3.44532	3.45599	82.3643	82.3022	0.0993947	0.102662	0	0	0	90	0.000154118	-8.84571	0	0	0	0	0.375
1663	70	360	3.53219	3.52845	82.2805	82.3022	0.377166	0.389566	0	0	0	88.0667	16.3246	-8.74179	0	0	0	0	0.375
1664	70	420	4.8383	4.7296	77.3887	77.9788	0.654937	0.676469	0	0	0	74.7125	176.126	-7.52262	0	0	0	0	0.375
1665	70	480	7.21518	6.95927	67.6063	68.8034	0.932708	0.963372	0	0	0	61.1165	352.31	-5.3325	0	0	0	0	0.375
1666	70	540	10.1953	9.82898	58.1825	59.6281	1.21048	1.25028	0	0	0	47.8244	504.02	-2.44814	0	0	0	0	0.375
1667	70	600	13.269	12.8388	49.0528	50.4528	1.48825	1.53718	0	0	0	35.3186	619.907	0.49822	0	0	0	0	0.375
1668	70	660	15.9204	15.4642	31.1776	32.1021	1.76602	1.82408	0	0	0	24.9312	696.261	1.80775	0	0	0	0	0.375
1669	70	720	17.6745	17.248	31.2487	32.1021	2.32156	2.39789	0	0	0	20.3135	720.706	3.93792	0	0	0	0	0.375
1670	70	780	18.3046	17.8792	33.2915	34.1938	2.32156	2.39789	0	0	0	24.9312	695.954	4.95261	0	0	0	0	0.375
1671	70	840	17.6635	17.248	35.3452	36.2854	2.22723	2.30046	0	0	0	35.3186	621.767	4.44125	0	0	0	0	0.375
1672	70	900	15.8465	15.4642	37.4487	38.3771	2.1329	2.20302	0	0	0	47.8244	506.292	2.53256	0	0	0	0	0.375
1673	70	960	13.1581	12.8388	39.632	40.4688	2.03857	2.10559	0	0	0	61.1165	354.431	-0.398718	0	0	0	0	0.375
1674	70	1020	10.0533	9.82898	41.9253	42.5605	1.94424	2.00816	0	0	0	74.7125	177.454	-3.8002	0	0	0	0	0.375
1675	70	1080	7.07044	6.95926	44.3127	44.6521	1.84991	1.91073	0	0	0	88.0667	16.4726	-7.04161	0	0	0	0	0.375
1676	70	1140	6.07929	6.03186	46.5907	46.7438	1.75558	1.81329	0	0	0	90	0.000155286	-7.97197	0	0	0	0	0.375
1677	70	1200	5.4387	5.41094	48.7413	48.8355	1.66125	1.71586	0	0	0	90	0	-8.54474	0	0	0	0	0.375
1678	70	1260	4.95324	4.93306	50.8555	50.9271	1.56691	1.61843	0	0	0	90	0	-8.95409	0	0	0	0	0.375
1679	70	1320	4.57454	4.56527	52.9844	53.0188	1.47258	1.521	0	0	0	90	0	-9.23858	0	0	0	0	0.375
1680	70	1380	4.29106	4.2822	55.0762	55.1105	1.37825	1.42356	0	0	0	90	0	-9.4278	0	0	0	0	0.375
1681	71	0	4.06411	4.06434	57.2031	57.2022	1.28392	1.32613	0	0	0	90	0	-9.54449	0	0	0	0	0.375
1682	71	60	3.93159	3.93286	61.7414	61.7359	1.05541	1.09011	0	0	0	90	0	-9.40578	0	0	0	0	0.375
1683	71	120	3.79795	3.80138	66.2857	66.2697	0.826901	0.854087	0	0	0	90	0	-9.28668	0	0	0	0	0.375
1684	71	180	3.66429	3.66989	70.8315	70.8035	0.598392	0.618065	0	0	0	90	0	-9.18478	0	0	0	0	0.375
1685	71	240	3.5297	3.53841	75.3836	75.3372	0.246008	0.254096	0	0	0	90	0	-9.09806	0	0	0	0	0.375
1686	71	300	3.39544	3.40693	82.2563	82.1896	0.0971718	0.100366	0	0	0	90	0.00013098	-8.96743	0	0	0	0	0.375
1687	71	360	3.47649	3.47454	82.1783	82.1896	0.374901	0.387227	0	0	0	88.2075	15.264	-8.86906	0	0	0	0	0.375
1688	71	420	4.7785	4.67193	77.3476	77.9261	0.652631	0.674087	0	0	0	74.8729	174.589	-7.65121	0	0	0	0	0.375
1689	71	480	7.15783	6.90353	67.5502	68.7394	0.93036	0.960947	0	0	0	61.2868	351.267	-5.45939	0	0	0	0	0.375
1690	71	540	10.1452	9.77982	58.112	59.5527	1.20809	1.24781	0	0	0	48.0189	503.458	-2.56755	0	0	0	0	0.375
1691	71	600	13.2285	12.7987	48.9696	50.366	1.48582	1.53467	0	0	0	35.5611	619.718	0.388224	0	0	0	0	0.375
1692	71	660	15.8892	15.4333	31.0716	31.9926	1.76355	1.82153	0	0	0	25.2573	696.295	1.69256	0	0	0	0	0.375
1693	71	720	17.65	17.2237	31.1423	31.9926	2.31901	2.39525	0	0	0	20.706	720.822	3.83352	0	0	0	0	0.375
1694	71	780	18.2826	17.8574	33.1849	34.0841	2.31901	2.39525	0	0	0	25.2573	695.991	4.85491	0	0	0	0	0.375
1695	71	840	17.639	17.2237	35.2385	36.1756	2.22478	2.29792	0	0	0	35.5611	621.561	4.34218	0	0	0	0	0.375
1696	71	900	15.8152	15.4333	37.3419	38.2672	2.13055	2.2006	0	0	0	48.0189	505.708	2.42496	0	0	0	0	0.375
1697	71	960	13.1174	12.7987	39.5256	40.3587	2.03633	2.10327	0	0	0	61.2868	353.365	-0.519397	0	0	0	0	0.375
1698	71	1020	10.0031	9.77981	41.8193	42.4503	1.9421	2.00595	0	0	0	74.8729	175.895	-3.93478	0	0	0	0	0.375
1699	71	1080	7.01352	6.90352	44.2067	44.5418	1.84787	1.90862	0	0	0	88.2075	15.4012	-7.18693	0	0	0	0	0.375
1700	71	1140	6.03329	5.98664	46.4831	46.6333	1.75364	1.8113	0	0	0	90	0.000131962	-8.10453	0	0	0	0	0.375
1701	71	1200	5.3919	5.36459	48.6324	48.7249	1.65942	1.71397	0	0	0	90	0	-8.67808	0	0	0	0	0.375
1702	71	1260	4.9053	4.88568	50.7469	50.8164	1.56519	1.61665	0	0	0	90	0	-9.08795	0	0	0	0	0.375
1703	71	1320	4.52601	4.51698	52.8745	52.908	1.47096	1.51932	0	0	0	90	0	-9.3727	0	0	0	0	0.375
1704	71	1380	4.2414	4.23311	54.9675	54.9995	1.37673	1.422	0	0	0	90	0	-9.56197	0	0	0	0	0.375
1705	72	0	4.01412	4.01457	57.0929	57.0911	1.28251	1.32467	0	0	0	90	0	-9.67854	0	0	0	0	0.375
1706	72	60	3.88097	3.88266	61.626	61.6186	1.0546	1.08927	0	0	0	90	0	-9.53827	0	0	0	0	0.375
1707	72	120	3.74683	3.75075	66.1644	66.1462	0.826693	0.853871	0	0	0	90	0	-9.41779	0	0	0	0	0.375
1708	72	180	3.61268	3.61884	70.7044	70.6737	0.598785	0.618471	0	0	0	90	0	-9.31464	0	0	0	0	0.375
1709	72	240	3.47753	3.48693	75.2512	75.2013	0.245744	0.253824	0	0	0	90	0	-9.22681	0	0	0	0	0.375
1710	72	300	3.34269	3.35502	82.1388	82.0673	0.0949505	0.0980722	0	0	0	90	0.000111318	-9.09135	0	0	0	0	0.375
1711	72	360	3.41797	3.41782	82.0664	82.0673	0.372647	0.384898	0	0	0	88.3486	14.2201	-8.99851	0	0	0	0	0.375
1712	72	420	4.71502	4.61156	77.3025	77.864	0.650343	0.671724	0	0	0	75.0343	173.007	-7.78184	0	0	0	0	0.375
1713	72	480	7.09817	6.84541	67.4849	68.6661	0.928039	0.958549	0	0	0	61.4585	350.145	-5.588	0	0	0	0	0.375
1714	72	540	10.0932	9.72873	58.0325	59.4682	1.20573	1.24538	0	0	0	48.2155	502.789	-2.68823	0	0	0	0	0.375
1715	72	600	13.1865	12.7573	48.8778	50.2704	1.48343	1.5322	0	0	0	35.8064	619.4	0.277444	0	0	0	0	0.375
1716	72	660	15.8569	15.4014	30.9575	31.8746	1.76113	1.81903	0	0	0	25.5857	696.188	1.57704	0	0	0	0	0.375
1717	72	720	17.6247	17.1987	31.0279	31.8746	2.31652	2.39268	0	0	0	21.0991	720.793	3.72904	0	0	0	0	0.375
1718	72	780	18.2599	17.8349	33.0702	33.966	2.31652	2.39268	0	0	0	25.5857	695.887	4.75722	0	0	0	0	0.375
1719	72	840	17.6138	17.1987	35.1236	36.0573	2.22239	2.29546	0	0	0	35.8064	621.227	4.24304	0	0	0	0	0.375
1720	72	900	15.7829	15.4014	37.2271	38.1487	2.12827	2.19824	0	0	0	48.2155	505.017	2.31701	0	0	0	0	0.375
1721	72	960	13.0753	12.7573	39.4108	40.2401	2.03414	2.10102	0	0	0	61.4585	352.218	-0.640822	0	0	0	0	0.375
1722	72	1020	9.95096	9.72872	41.7049	42.3314	1.94001	2.0038	0	0	0	75.0343	174.29	-4.07053	0	0	0	0	0.375
1723	72	1080	6.95421	6.84541	44.092	44.4228	1.84589	1.90657	0	0	0	88.3486	14.3469	-7.33379	0	0	0	0	0.375
1724	72	1140	5.98483	5.93896	46.3667	46.5141	1.75176	1.80935	0	0	0	90	0.000112144	-8.23867	0	0	0	0	0.375
1725	72	1200	5.34252	5.31565	48.5148	48.6055	1.65764	1.71213	0	0	0	90	0	-8.81312	0	0	0	0	0.375
1726	72	1260	4.85468	4.83562	50.6294	50.6969	1.56351	1.61491	0	0	0	90	0	-9.2236	0	0	0	0	0.375
1727	72	1320	4.47472	4.46593	52.7557	52.7882	1.46938	1.51769	0	0	0	90	0	-9.5087	0	0	0	0	0.375
1728	72	1380	4.18893	4.18122	54.8499	54.8796	1.37526	1.42047	0	0	0	90	0	-9.69809	0	0	0	0	0.375
1729	73	0	3.96128	3.96195	56.9736	56.9709	1.28113	1.32325	0	0	0	90	0	-9.81459	0	0	0	0	0.375
1730	73	60	3.82747	3.82959	61.5013	61.4922	1.05382	1.08846	0	0	0	90	0	-9.67284	0	0	0	0	0.375
1731	73	120	3.69282	3.69722	66.0339	66.0134	0.826503	0.853676	0	0	0	90	0	-9.55105	0	0	0	0	0.375
1732	73	180	3.55816	3.56486	70.568	70.5346	0.599189	0.618888	0	0	0	90	0	-9.44673	0	0	0	0	0.375
1733	73	240	3.42242	3.43249	75.1093	75.0559	0.245489	0.25356	0	0	0	90	0	-9.35785	0	0	0	0	0.375
1734	73	300	3.28698	3.30013	82.0111	81.9348	0.0927315	0.0957801	0	0	0	90	9.46132e-05	-9.21746	0	0	0	0	0.375
1735	73	360	3.35653	3.35814	81.9442	81.9348	0.370404	0.382581	0	0	0	88.49	13.1951	-9.13013	0	0	0	0	0.375
1736	73	420	4.64965	4.54837	77.2426	77.7921	0.648076	0.669382	0	0	0	75.1964	171.378	-7.91449	0	0	0	0	0.375
1737	73	480	7.03583	6.78481	67.4109	68.5832	0.925748	0.956184	0	0	0	61.6317	348.94	-5.71831	0	0	0	0	0.375
1738	73	540	10.039	9.67563	57.9446	59.3744	1.20342	1.24298	0	0	0	48.4143	502.007	-2.81016	0	0	0	0	0.375
1739	73	600	13.1429	12.7143	48.7777	50.1656	1.48109	1.52979	0	0	0	36.0543	618.949	0.165935	0	0	0	0	0.375
1740	73	660	15.8235	15.3685	30.8352	31.7479	1.75877	1.81659	0	0	0	25.9163	695.934	1.46126	0	0	0	0	0.375
1741	73	720	17.5986	17.1731	30.9052	31.7479	2.31411	2.39019	0	0	0	21.4928	720.612	3.62458	0	0	0	0	0.375
1742	73	780	18.2365	17.8119	32.9471	33.839	2.31411	2.39019	0	0	0	25.9163	695.636	4.65965	0	0	0	0	0.375
1743	73	840	17.5878	17.1731	35.0004	35.9301	2.22008	2.29307	0	0	0	36.0543	620.76	4.1439	0	0	0	0	0.375
1744	73	900	15.7495	15.3685	37.1037	38.0213	2.12605	2.19595	0	0	0	48.4143	504.215	2.20878	0	0	0	0	0.375
1745	73	960	13.0316	12.7143	39.2874	40.1124	2.03202	2.09883	0	0	0	61.6317	350.99	-0.762922	0	0	0	0	0.375
1746	73	1020	9.89674	9.67563	41.5818	42.2035	1.938	2.00171	0	0	0	75.1964	172.639	-4.20739	0	0	0	0	0.375
1747	73	1080	6.89238	6.78481	43.9684	44.2946	1.84397	1.90459	0	0	0	88.49	13.3119	-7.48215	0	0	0	0	0.375
1748	73	1140	5.93376	5.8887	46.2413	46.3858	1.74994	1.80747	0	0	0	90	9.53092e-05	-8.37432	0	0	0	0	0.375
1749	73	1200	5.29041	5.26402	48.3879	48.4769	1.65591	1.71035	0	0	0	90	0	-8.94981	0	0	0	0	0.375
1750	73	1260	4.80126	4.78276	50.5027	50.568	1.56188	1.61323	0	0	0	90	0	-9.361	0	0	0	0	0.375
1751	73	1320	4.42055	4.41202	52.6276	52.6591	1.46786	1.51611	0	0	0	90	0	-9.64653	0	0	0	0	0.375
1752	73	1380	4.13353	4.12639	54.7228	54.7502	1.37383	1.41899	0	0	0	90	0	-9.83612	0	0	0	0	0.375
1753	74	0	3.90546	3.90636	56.845	56.8414	1.2798	1.32187	0	0	0	90	0	-9.95262	0	0	0	0	0.375
1754	74	60	3.77097	3.77351	61.3671	61.3562	1.05307	1.08769	0	0	0	90	0	-9.80947	0	0	0	0	0.375
1755	74	120	3.63578	3.64067	65.8937	65.8709	0.826337	0.853504	0	0	0	90	0	-9.68644	0	0	0	0	0.375
1756	74	180	3.50057	3.50782	70.4218	70.3857	0.599606	0.619319	0	0	0	90	0	-9.58102	0	0	0	0	0.375
1757	74	240	3.36421	3.37497	74.9576	74.9005	0.245242	0.253305	0	0	0	90	0	-9.49118	0	0	0	0	0.375
1758	74	300	3.22814	3.24213	81.8727	81.7917	0.090515	0.0934908	0	0	0	90	8.04244e-05	-9.34579	0	0	0	0	0.375
1759	74	360	3.29202	3.29538	81.8112	81.7917	0.368174	0.380278	0	0	0	88.6316	12.1915	-9.26394	0	0	0	0	0.375
1760	74	420	4.58131	4.48224	77.1726	77.7098	0.645833	0.667065	0	0	0	75.3594	169.702	-8.04917	0	0	0	0	0.375
1761	74	480	6.97083	6.72163	67.3273	68.4903	0.923491	0.953853	0	0	0	61.8063	347.65	-5.85031	0	0	0	0	0.375
1762	74	540	9.98259	9.62044	57.8475	59.2707	1.20115	1.24064	0	0	0	48.6151	501.11	-2.93329	0	0	0	0	0.375
1763	74	600	13.0976	12.6698	48.6686	50.0511	1.47881	1.52743	0	0	0	36.3048	618.358	0.053755	0	0	0	0	0.375
1764	74	660	15.7889	15.3345	30.7042	31.612	1.75647	1.81421	0	0	0	26.2489	695.527	1.34534	0	0	0	0	0.375
1765	74	720	17.5717	17.1467	30.7738	31.612	2.31179	2.38779	0	0	0	21.887	720.272	3.52023	0	0	0	0	0.375
1766	74	780	18.2125	17.7883	32.8153	33.7028	2.31179	2.38779	0	0	0	26.2489	695.231	4.56228	0	0	0	0	0.375
1767	74	840	17.5609	17.1467	34.8683	35.7936	2.21785	2.29077	0	0	0	36.3048	620.154	4.04485	0	0	0	0	0.375
1768	74	900	15.7149	15.3345	36.9714	37.8845	2.12392	2.19374	0	0	0	48.6151	503.297	2.10037	0	0	0	0	0.375
1769	74	960	12.9863	12.6698	39.155	39.9753	2.02998	2.09672	0	0	0	61.8063	349.677	-0.885625	0	0	0	0	0.375
1770	74	1020	9.84037	9.62044	41.4494	42.0661	1.93605	1.9997	0	0	0	75.3594	170.941	-4.3453	0	0	0	0	0.375
1771	74	1080	6.82793	6.72162	43.8353	44.1569	1.84212	1.90268	0	0	0	88.6316	12.2986	-7.63195	0	0	0	0	0.375
1772	74	1140	5.87999	5.83577	46.1063	46.2478	1.74818	1.80566	0	0	0	90	8.10106e-05	-8.51145	0	0	0	0	0.375
1773	74	1200	5.2355	5.20957	48.2514	48.3386	1.65425	1.70863	0	0	0	90	0	-9.08809	0	0	0	0	0.375
1774	74	1260	4.74493	4.72701	50.3663	50.4294	1.56032	1.61161	0	0	0	90	0	-9.50009	0	0	0	0	0.375
1775	74	1320	4.3634	4.35513	52.4898	52.5202	1.46638	1.51459	0	0	0	90	0	-9.78615	0	0	0	0	0.375
1776	74	1380	4.07509	4.06854	54.5859	54.611	1.37245	1.41757	0	0	0	90	0	-9.97601	0	0	0	0	0.375
1777	75	0	3.84655	3.84769	56.7064	56.7019	1.27851	1.32055	0	0	0	90	0	-10.0926	0	0	0	0	0.375
1778	75	60	3.71136	3.71434	61.2229	61.2101	1.05236	1.08695	0	0	0	90	0	-9.94809	0	0	0	0	0.375
1779	75	120	3.5756	3.58098	65.7433	65.7183	0.826197	0.853359	0	0	0	90	0	-9.82391	0	0	0	0	0.375
1780	75	180	3.43982	3.44763	70.2653	70.2265	0.600038	0.619765	0	0	0	90	0	-9.71748	0	0	0	0	0.375
1781	75	240	3.30282	3.31428	74.7954	74.7348	0.245005	0.25306	0	0	0	90	0	-9.62675	0	0	0	0	0.375
1782	75	300	3.16608	3.18092	81.7234	81.6376	0.0883015	0.0912045	0	0	0	90	6.83741e-05	-9.47632	0	0	0	0	0.375
1783	75	360	3.22435	3.22945	81.6671	81.6376	0.365958	0.377989	0	0	0	88.7734	11.2118	-9.39994	0	0	0	0	0.375
1784	75	420	4.50991	4.41308	77.092	77.6169	0.643614	0.664774	0	0	0	75.5231	167.979	-8.1859	0	0	0	0	0.375
1785	75	480	6.90308	6.65577	67.2337	68.3868	0.921271	0.951559	0	0	0	61.9822	346.274	-5.984	0	0	0	0	0.375
1786	75	540	9.92393	9.5631	57.7408	59.1568	1.19893	1.23834	0	0	0	48.8178	500.094	-3.05761	0	0	0	0	0.375
1787	75	600	13.0506	12.6237	48.55	49.9267	1.47658	1.52513	0	0	0	36.5577	617.624	-0.0590627	0	0	0	0	0.375
1788	75	660	15.7531	15.2994	30.5642	31.4667	1.75424	1.81191	0	0	0	26.5834	694.962	1.22931	0	0	0	0	0.375
1789	75	720	17.544	17.1196	30.6334	31.4667	2.30955	2.38548	0	0	0	22.2817	719.77	3.41607	0	0	0	0	0.375
1790	75	780	18.1877	17.7641	32.6745	33.5571	2.30955	2.38548	0	0	0	26.5834	694.669	4.46518	0	0	0	0	0.375
1791	75	840	17.5332	17.1196	34.7272	35.6476	2.21571	2.28855	0	0	0	36.5577	619.406	3.94597	0	0	0	0	0.375
1792	75	900	15.6791	15.2994	36.8299	37.738	2.12187	2.19163	0	0	0	48.8178	502.262	1.99181	0	0	0	0	0.375
1793	75	960	12.9393	12.6237	39.0133	39.8285	2.02802	2.0947	0	0	0	61.9822	348.279	-1.00889	0	0	0	0	0.375
1794	75	1020	9.78177	9.56309	41.3076	41.919	1.93418	1.99777	0	0	0	75.5231	169.197	-4.48423	0	0	0	0	0.375
1795	75	1080	6.76078	6.65577	43.6926	44.0094	1.84034	1.90084	0	0	0	88.7734	11.3096	-7.78317	0	0	0	0	0.375
1796	75	1140	5.82347	5.7801	45.9615	46.0999	1.74649	1.80391	0	0	0	90	6.88681e-05	-8.64999	0	0	0	0	0.375
1797	75	1200	5.17774	5.1523	48.105	48.1903	1.65265	1.70698	0	0	0	90	0	-9.22788	0	0	0	0	0.375
1798	75	1260	4.68568	4.66834	50.2199	50.2808	1.55881	1.61006	0	0	0	90	0	-9.64078	0	0	0	0	0.375
1799	75	1320	4.30327	4.29527	52.3418	52.3712	1.46497	1.51313	0	0	0	90	0	-9.92742	0	0	0	0	0.375
1800	75	1380	4.01364	4.00767	54.4388	54.4617	1.37112	1.4162	0	0	0	90	0	-10.1176	0	0	0	0	0.375
1801	76	0	3.78459	3.78597	56.5577	56.5522	1.27728	1.31927	0	0	0	90	0	-10.2343	0	0	0	0	0.375
1802	76	60	3.64867	3.65208	61.0684	61.0537	1.05168	1.08626	0	0	0	90	0	-10.0886	0	0	0	0	0.375
1803	76	120	3.51233	3.5182	65.5824	65.5552	0.826087	0.853246	0	0	0	90	0	-9.96331	0	0	0	0	0.375
1804	76	180	3.37595	3.38431	70.0982	70.0568	0.600491	0.620233	0	0	0	90	0	-9.85595	0	0	0	0	0.375
1805	76	240	3.23828	3.25043	74.6225	74.5583	0.244778	0.252825	0	0	0	90	0	-9.7644	0	0	0	0	0.375
1806	76	300	3.10085	3.11654	81.5635	81.4729	0.0860907	0.0889211	0	0	0	90	5.81418e-05	-9.60913	0	0	0	0	0.375
1807	76	360	3.15357	3.16037	81.5122	81.4729	0.363755	0.375714	0	0	0	88.9153	10.2587	-9.53818	0	0	0	0	0.375
1808	76	420	4.4355	4.34092	77.0013	77.5135	0.641419	0.662507	0	0	0	75.6876	166.214	-8.32472	0	0	0	0	0.375
1809	76	480	6.83262	6.58727	67.1305	68.2732	0.919084	0.9493	0	0	0	62.1594	344.815	-6.11943	0	0	0	0	0.375
1810	76	540	9.86304	9.50362	57.6247	59.0329	1.19675	1.23609	0	0	0	49.0225	498.965	-3.18318	0	0	0	0	0.375
1811	76	600	13.0019	12.5761	48.4224	49.7927	1.47441	1.52289	0	0	0	36.8129	616.755	-0.17258	0	0	0	0	0.375
1812	76	660	15.7161	15.2633	30.4155	31.3121	1.75208	1.80968	0	0	0	26.9197	694.246	1.1131	0	0	0	0	0.375
1813	76	720	17.516	17.0917	30.483	31.3121	2.30741	2.38326	0	0	0	22.6766	720.659	3.312	0	0	0	0	0.375
1814	76	780	18.1624	17.7393	32.5243	33.4021	2.30741	2.38326	0	0	0	26.9197	693.956	4.36829	0	0	0	0	0.375
1815	76	840	17.5047	17.0917	34.5769	35.4922	2.21365	2.28643	0	0	0	36.8129	618.522	3.84718	0	0	0	0	0.375
1816	76	900	15.6422	15.2633	36.6794	37.5822	2.11989	2.18959	0	0	0	49.0225	501.113	1.88304	0	0	0	0	0.375
1817	76	960	12.8906	12.5761	38.8625	39.6722	2.02614	2.09275	0	0	0	62.1594	346.799	-1.13278	0	0	0	0	0.375
1818	76	1020	9.721	9.50361	41.1565	41.7623	1.93238	1.99591	0	0	0	75.6876	167.411	-4.62426	0	0	0	0	0.375
1819	76	1080	6.69096	6.58727	43.5404	43.8523	1.83863	1.89907	0	0	0	88.9153	10.3475	-7.93588	0	0	0	0	0.375
1820	76	1140	5.76424	5.72174	45.8071	45.9423	1.74487	1.80224	0	0	0	90	5.85584e-05	-8.79001	0	0	0	0	0.375
1821	76	1200	5.11719	5.09224	47.9489	48.0324	1.65111	1.7054	0	0	0	90	0	-9.36923	0	0	0	0	0.375
1822	76	1260	4.62357	4.60682	50.0637	50.1224	1.55736	1.60856	0	0	0	90	0	-9.78311	0	0	0	0	0.375
1823	76	1320	4.24023	4.23249	52.1841	52.2124	1.4636	1.51172	0	0	0	90	0	-10.0704	0	0	0	0	0.375
1824	76	1380	3.94922	3.94384	54.2819	54.3025	1.36985	1.41488	0	0	0	90	0	-10.261	0	0	0	0	0.375
1825	77	0	3.71963	3.72125	56.399	56.3925	1.27609	1.31804	0	0	0	90	0	-10.3778	0	0	0	0	0.375
1826	77	60	3.58297	3.58681	60.9038	60.8873	1.05105	1.0856	0	0	0	90	0	-10.2309	0	0	0	0	0.375
1827	77	120	3.44602	3.45238	65.4114	65.3821	0.826006	0.853162	0	0	0	90	0	-10.1047	0	0	0	0	0.375
1828	77	180	3.30903	3.31794	69.9209	69.8768	0.600963	0.620721	0	0	0	90	0	-9.99646	0	0	0	0	0.375
1829	77	240	3.17066	3.1835	74.4392	74.3716	0.244558	0.252598	0	0	0	90	0	-9.90416	0	0	0	0	0.375
1830	77	300	3.03252	3.04906	81.3934	81.2981	0.0838826	0.0866403	0	0	0	90	4.94546e-05	-9.74427	0	0	0	0	0.375
1831	77	360	3.07976	3.08823	81.3469	81.2981	0.361564	0.373451	0	0	0	89.0573	9.335	-9.67873	0	0	0	0	0.375
1832	77	420	4.35813	4.26582	76.9007	77.4003	0.639246	0.660262	0	0	0	75.8526	164.408	-8.4657	0	0	0	0	0.375
1833	77	480	6.75952	6.51619	67.0179	68.15	0.916927	0.947072	0	0	0	62.3378	343.28	-6.25668	0	0	0	0	0.375
1834	77	540	9.79999	9.44205	57.4996	58.8996	1.19461	1.23388	0	0	0	49.2289	497.729	-3.31008	0	0	0	0	0.375
1835	77	600	12.9515	12.5269	48.2861	49.6493	1.47229	1.52069	0	0	0	37.0704	615.756	-0.286885	0	0	0	0	0.375
1836	77	660	15.678	15.2261	30.2584	31.1487	1.74997	1.8075	0	0	0	27.2576	693.388	0.996577	0	0	0	0	0.375
1837	77	720	17.4866	17.0632	30.3254	31.1487	2.30533	2.38113	0	0	0	23.0716	719.857	3.20791	0	0	0	0	0.375
1838	77	780	18.1362	17.7139	32.3662	33.2382	2.30533	2.38113	0	0	0	27.2576	693.101	4.27147	0	0	0	0	0.375
1839	77	840	17.4754	17.0632	34.4183	35.3278	2.21166	2.28437	0	0	0	37.0704	617.51	3.74836	0	0	0	0	0.375
1840	77	900	15.6041	15.2261	36.5203	37.4174	2.11799	2.18762	0	0	0	49.2289	499.859	1.77396	0	0	0	0	0.375
1841	77	960	12.8403	12.5269	38.703	39.5069	2.02432	2.09087	0	0	0	62.3378	345.243	-1.25742	0	0	0	0	0.375
1842	77	1020	9.65808	9.44205	40.9965	41.5965	1.93065	1.99412	0	0	0	75.8526	165.585	-4.76548	0	0	0	0	0.375
1843	77	1080	6.61901	6.51618	43.3777	43.686	1.83698	1.89737	0	0	0	89.0573	9.41534	-8.09021	0	0	0	0	0.375
1844	77	1140	5.70261	5.66076	45.6429	45.7756	1.7433	1.80062	0	0	0	90	4.98061e-05	-8.93161	0	0	0	0	0.375
1845	77	1200	5.05397	5.02947	47.7834	47.8651	1.64963	1.70387	0	0	0	90	0	-9.51226	0	0	0	0	0.375
1846	77	1260	4.55877	4.5425	49.8978	49.9547	1.55596	1.60712	0	0	0	90	0	-9.92718	0	0	0	0	0.375
1847	77	1320	4.17427	4.16687	52.0172	52.0443	1.46229	1.51036	0	0	0	90	0	-10.2152	0	0	0	0	0.375
1848	77	1380	3.88201	3.87712	54.1152	54.1338	1.36862	1.41361	0	0	0	90	0	-10.4062	0	0	0	0	0.375
1849	78	0	3.65165	3.6536	56.2311	56.2234	1.27495	1.31686	0	0	0	90	0	-10.5232	0	0	0	0	0.375
1850	78	60	3.51432	3.5186	60.7296	60.7113	1.05045	1.08498	0	0	0	90	0	-10.3753	0	0	0	0	0.375
1851	78	120	3.37674	3.38359	65.2308	65.1992	0.82595	0.853105	0	0	0	90	0	-10.2481	0	0	0	0	0.375
1852	78	180	3.23912	3.24858	69.7338	69.6871	0.601452	0.621226	0	0	0	90	0	-10.1391	0	0	0	0	0.375
1853	78	240	3.10004	3.11357	74.2462	74.1751	0.244345	0.252378	0	0	0	90	0	-10.0461	0	0	0	0	0.375
1854	78	300	2.96116	2.97856	81.2138	81.1136	0.0816767	0.084362	0	0	0	90	4.20797e-05	-9.8818	0	0	0	0	0.375
1855	78	360	3.00297	3.01309	81.1718	81.1136	0.359383	0.371199	0	0	0	89.1993	8.44354	-9.82164	0	0	0	0	0.375
1856	78	420	4.27788	4.18785	76.7908	77.2777	0.63709	0.658035	0	0	0	76.0183	162.566	-8.60892	0	0	0	0	0.375
1857	78	480	6.68043	6.44257	66.9121	68.0175	0.914797	0.944872	0	0	0	62.5175	336.303	-6.39582	0	0	0	0	0.375
1858	78	540	9.73302	9.37845	57.3729	58.7573	1.1925	1.23171	0	0	0	49.4371	496.395	-3.43839	0	0	0	0	0.375
1859	78	600	12.9027	12.4762	48.1318	49.4971	1.47021	1.51855	0	0	0	37.33	614.638	-0.402064	0	0	0	0	0.375
1860	78	660	15.6409	15.188	30.0891	30.9767	1.74792	1.80538	0	0	0	27.597	691.886	0.879624	0	0	0	0	0.375
1861	78	720	17.4589	17.0341	30.155	30.9767	2.30333	2.37906	0	0	0	23.4668	718.918	3.10367	0	0	0	0	0.375
1862	78	780	18.1171	17.688	32.1844	33.0658	2.30333	2.37906	0	0	0	27.597	691.602	4.17463	0	0	0	0	0.375
1863	78	840	17.4459	17.0341	34.2503	35.1548	2.20974	2.28239	0	0	0	37.33	616.378	3.64941	0	0	0	0	0.375
1864	78	900	15.5649	15.188	36.3532	37.2438	2.11615	2.18572	0	0	0	49.4371	498.506	1.66445	0	0	0	0	0.375
1865	78	960	12.786	12.4762	38.5414	39.3329	2.02256	2.08905	0	0	0	62.5175	338.214	-1.38291	0	0	0	0	0.375
1866	78	1020	9.59185	9.37845	40.8314	41.4219	1.92897	1.99239	0	0	0	76.0183	163.723	-4.90803	0	0	0	0	0.375
1867	78	1080	6.54455	6.44257	43.2062	43.511	1.83538	1.89572	0	0	0	89.1993	8.51578	-8.24626	0	0	0	0	0.375
1868	78	1140	5.63842	5.59721	45.4698	45.6	1.74179	1.79905	0	0	0	90	4.23766e-05	-9.07489	0	0	0	0	0.375
1869	78	1200	4.98801	4.96404	47.6093	47.689	1.6482	1.70239	0	0	0	90	0	-9.65705	0	0	0	0	0.375
1870	78	1260	4.49123	4.47546	49.7231	49.7781	1.55461	1.60572	0	0	0	90	0	-10.0731	0	0	0	0	0.375
1871	78	1320	4.10542	4.09847	51.8418	51.8671	1.46102	1.50905	0	0	0	90	0	-10.3619	0	0	0	0	0.375
1872	78	1380	3.81199	3.80757	53.9394	53.9561	1.36743	1.41238	0	0	0	90	0	-10.5534	0	0	0	0	0.375
1873	79	0	3.58072	3.58311	56.0546	56.0452	1.27384	1.31572	0	0	0	90	0	-10.6707	0	0	0	0	0.375
1874	79	60	3.44274	3.4475	60.5466	60.5262	1.04988	1.08439	0	0	0	90	0	-10.5217	0	0	0	0	0.375
1875	79	120	3.30452	3.3119	65.0411	65.0072	0.825917	0.85307	0	0	0	90	0	-10.3936	0	0	0	0	0.375
1876	79	180	3.16626	3.1763	69.5376	69.4882	0.601957	0.621747	0	0	0	90	0	-10.2839	0	0	0	0	0.375
1877	79	240	3.02643	3.04069	74.044	73.9692	0.244139	0.252165	0	0	0	90	0	-10.1903	0	0	0	0	0.375
1878	79	300	2.88677	2.90509	81.0254	80.9201	0.0794731	0.0820859	0	0	0	90	3.5819e-05	-10.0218	0	0	0	0	0.375
1879	79	360	2.92325	2.93501	80.9877	80.9201	0.357212	0.368956	0	0	0	89.3413	7.58719	-9.96698	0	0	0	0	0.375
1880	79	420	4.19478	4.10707	76.6723	77.1461	0.634951	0.655826	0	0	0	76.1846	160.69	-8.75442	0	0	0	0	0.375
1881	79	480	6.60217	6.36648	66.7825	67.8762	0.91269	0.942696	0	0	0	62.6982	334.62	-6.53692	0	0	0	0	0.375
1882	79	540	9.66574	9.31286	57.2313	58.6063	1.19043	1.22957	0	0	0	49.647	494.967	-3.56819	0	0	0	0	0.375
1883	79	600	12.8501	12.4241	47.9766	49.3364	1.46817	1.51644	0	0	0	37.5916	615.581	-0.518202	0	0	0	0	0.375
1884	79	660	15.6017	15.1488	29.9138	30.7966	1.74591	1.80331	0	0	0	27.9377	690.769	0.762114	0	0	0	0	0.375
1885	79	720	17.4278	17.0043	29.982	30.7966	2.30138	2.37705	0	0	0	23.8619	717.849	2.99918	0	0	0	0	0.375
1886	79	780	18.0879	17.6615	32.0139	32.8851	2.30138	2.37705	0	0	0	27.9377	690.488	4.07765	0	0	0	0	0.375
1887	79	840	17.4159	17.0042	34.074	34.9736	2.20787	2.28046	0	0	0	37.5916	617.314	3.55023	0	0	0	0	0.375
1888	79	900	15.5251	15.1488	36.177	37.0621	2.11436	2.18388	0	0	0	49.647	497.061	1.55441	0	0	0	0	0.375
1889	79	960	12.7328	12.4241	38.3651	39.1505	2.02085	2.08729	0	0	0	62.6982	336.511	-1.50935	0	0	0	0	0.375
1890	79	1020	9.52486	9.31286	40.6546	41.239	1.92734	1.9907	0	0	0	76.1846	161.827	-5.05199	0	0	0	0	0.375
1891	79	1080	6.46795	6.36648	43.0254	43.3275	1.83383	1.89412	0	0	0	89.3413	7.65174	-8.40414	0	0	0	0	0.375
1892	79	1140	5.5719	5.53117	45.2877	45.416	1.74032	1.79753	0	0	0	90	3.60699e-05	-9.21996	0	0	0	0	0.375
1893	79	1200	4.91959	4.89602	47.4263	47.5044	1.64681	1.70095	0	0	0	90	0	-9.80371	0	0	0	0	0.375
1894	79	1260	4.42114	4.40577	49.5395	49.5929	1.5533	1.60436	0	0	0	90	0	-10.2209	0	0	0	0	0.375
1895	79	1320	4.03393	4.02736	51.6575	51.6814	1.45978	1.50778	0	0	0	90	0	-10.5106	0	0	0	0	0.375
1896	79	1380	3.73928	3.73527	53.7547	53.7699	1.36627	1.41119	0	0	0	90	0	-10.7026	0	0	0	0	0.375
1897	80	0	3.50705	3.50982	55.8693	55.8584	1.27276	1.31461	0	0	0	90	0	-10.8202	0	0	0	0	0.375
1898	80	60	3.3684	3.3736	60.3546	60.3324	1.04933	1.08383	0	0	0	90	0	-10.6702	0	0	0	0	0.375
1899	80	120	3.22953	3.23739	64.8425	64.8065	0.825903	0.853056	0	0	0	90	0	-10.5413	0	0	0	0	0.375
1900	80	180	3.0906	3.10117	69.3324	69.2805	0.602474	0.622281	0	0	0	90	0	-10.4309	0	0	0	0	0.375
1901	80	240	2.95002	2.96496	73.8327	73.7546	0.243938	0.251957	0	0	0	90	0	-10.3368	0	0	0	0	0.375
1902	80	300	2.80956	2.82874	80.8281	80.718	0.0772715	0.0798119	0	0	0	90	3.05039e-05	-10.1643	0	0	0	0	0.375
1903	80	360	2.83792	2.85408	80.8107	80.718	0.355049	0.366721	0	0	0	89.4833	4.13164	-10.1148	0	0	0	0	0.375
1904	80	420	4.10732	4.02355	76.5541	77.0062	0.632826	0.653631	0	0	0	76.3513	158.785	-8.90229	0	0	0	0	0.375
1905	80	480	6.52109	6.28798	66.6466	67.7267	0.910603	0.94054	0	0	0	62.88	332.877	-6.68006	0	0	0	0	0.375
1906	80	540	9.59633	9.24533	57.0824	58.4472	1.18838	1.22745	0	0	0	49.8585	493.453	-3.69954	0	0	0	0	0.375
1907	80	600	12.7951	12.3705	47.8165	49.1677	1.46616	1.51436	0	0	0	37.855	614.249	-0.635387	0	0	0	0	0.375
1908	80	660	15.5603	15.1088	29.7335	30.6087	1.74393	1.80127	0	0	0	28.2796	689.536	0.643922	0	0	0	0	0.375
1909	80	720	17.3963	16.9738	29.8008	30.6087	2.29949	2.37509	0	0	0	24.257	716.66	2.8943	0	0	0	0	0.375
1910	80	780	18.0598	17.6346	31.8326	32.6966	2.29949	2.37509	0	0	0	28.2796	689.257	3.98041	0	0	0	0	0.375
1911	80	840	17.3844	16.9738	33.8919	34.7845	2.20605	2.27858	0	0	0	37.855	615.969	3.45071	0	0	0	0	0.375
1912	80	900	15.4839	15.1088	35.9942	36.8723	2.11262	2.18208	0	0	0	49.8585	495.53	1.44374	0	0	0	0	0.375
1913	80	960	12.6779	12.3705	38.1816	38.9602	2.01919	2.08557	0	0	0	62.88	334.748	-1.63685	0	0	0	0	0.375
1914	80	1020	9.45581	9.24533	40.4703	41.0481	1.92575	1.98906	0	0	0	76.3513	159.902	-5.19748	0	0	0	0	0.375
1915	80	1080	6.38816	6.28798	42.8388	43.136	1.83232	1.89256	0	0	0	89.4833	4.16661	-8.56395	0	0	0	0	0.375
1916	80	1140	5.50275	5.4627	45.0982	45.2239	1.73888	1.79605	0	0	0	90	3.0716e-05	-9.36693	0	0	0	0	0.375
1917	80	1200	4.84857	4.82548	47.2355	47.3118	1.64545	1.69955	0	0	0	90	0	-9.95234	0	0	0	0	0.375
1918	80	1260	4.34831	4.33348	49.3483	49.3997	1.55202	1.60304	0	0	0	90	0	-10.3708	0	0	0	0	0.375
1919	80	1320	3.95984	3.9536	51.465	51.4876	1.45858	1.50653	0	0	0	90	0	-10.6613	0	0	0	0	0.375
1920	80	1380	3.66376	3.66029	53.5623	53.5755	1.36515	1.41003	0	0	0	90	0	-10.854	0	0	0	0	0.375
1921	81	0	3.43073	3.43382	55.6755	55.6634	1.27171	1.31352	0	0	0	90	0	-10.9719	0	0	0	0	0.375
1922	81	60	3.3003	3.30608	59.8574	59.833	1.06662	1.10168	0	0	0	90	0	-10.8303	0	0	0	0	0.375
1923	81	120	3.16979	3.17834	64.0414	64.0026	0.861519	0.889842	0	0	0	90	0	-10.7075	0	0	0	0	0.375
1924	81	180	3.03927	3.05061	68.227	68.1722	0.656421	0.678002	0	0	0	90	0	-10.6011	0	0	0	0	0.375
1925	81	240	2.90843	2.92287	72.4159	72.3418	0.451324	0.466162	0	0	0	90	0	-10.5093	0	0	0	0	0.375
1926	81	300	2.77671	2.79513	76.6116	76.5114	0.243741	0.251754	0	0	0	90	2.5955e-05	-10.4307	0	0	0	0	0.375
1927	81	360	2.6627	2.6674	80.5348	80.5079	0.241651	0.249595	0	0	0	90	15.5296	-10.4099	0	0	0	0	0.375
1928	81	420	3.49846	3.39743	79.9354	80.5079	0.535362	0.552963	0	0	0	76.5185	156.739	-9.51609	0	0	0	0	0.375
1929	81	480	5.71419	5.46585	69.3403	70.5461	0.829074	0.856331	0	0	0	63.0627	330.886	-7.54759	0	0	0	0	0.375
1930	81	540	8.8255	8.46127	59.0382	60.5129	1.12279	1.1597	0	0	0	50.0715	491.647	-4.54348	0	0	0	0	0.375
1931	81	600	12.2231	11.7892	49.0558	50.4797	1.4165	1.46307	0	0	0	38.1203	612.643	-1.26538	0	0	0	0	0.375
1932	81	660	15.2439	14.7893	29.5357	30.4133	1.71021	1.76643	0	0	0	28.6225	688.195	0.188964	0	0	0	0	0.375
1933	81	720	17.29	16.866	29.607	30.4133	2.29763	2.37317	0	0	0	24.6518	715.359	2.69603	0	0	0	0	0.375
1934	81	780	18.0281	17.6073	31.6501	32.5005	2.29763	2.37317	0	0	0	28.6225	687.919	3.88282	0	0	0	0	0.375
1935	81	840	17.2751	16.866	33.7027	34.5878	2.20427	2.27674	0	0	0	38.1203	614.527	3.25749	0	0	0	0	0.375
1936	81	900	15.165	14.7893	35.7981	36.6751	2.11091	2.18031	0	0	0	50.0715	493.919	0.9945	0	0	0	0	0.375
1937	81	960	12.0985	11.7892	37.9794	38.7624	2.01756	2.08389	0	0	0	63.0627	332.93	-2.40316	0	0	0	0	0.375
1938	81	1020	8.67373	8.46126	40.2656	40.8496	1.9242	1.98746	0	0	0	76.5185	157.951	-6.20865	0	0	0	0	0.375
1939	81	1080	6.33047	6.22736	42.6323	42.9369	1.83084	1.89103	0	0	0	90	15.6432	-8.70137	0	0	0	0	0.375
1940	81	1140	5.4872	5.44505	44.8925	45.0242	1.73748	1.7946	0	0	0	90	2.61705e-05	-9.45163	0	0	0	0	0.375
1941	81	1200	4.85319	4.83068	47.0375	47.1115	1.64412	1.69817	0	0	0	90	0	-10.0085	0	0	0	0	0.375
1942	81	1260	4.3613	4.3482	49.1536	49.1988	1.55076	1.60175	0	0	0	90	0	-10.4145	0	0	0	0	0.375
1943	81	1320	3.97598	3.9693	51.2619	51.286	1.4574	1.50532	0	0	0	90	0	-10.7029	0	0	0	0	0.375
1944	81	1380	3.67315	3.67174	53.368	53.3733	1.36405	1.40889	0	0	0	90	0	-10.8997	0	0	0	0	0.375
1945	82	0	3.43567	3.43806	55.4699	55.4606	1.27069	1.31246	0	0	0	90	0	-11.0253	0	0	0	0	0.375
1946	82	60	3.28968	3.29592	59.6503	59.624	1.06604	1.10109	0	0	0	90	0	-10.8995	0	0	0	0	0.375
1947	82	120	3.14469	3.15378	63.8285	63.7874	0.861399	0.889719	0	0	0	90	0	-10.7926	0	0	0	0	0.375
1948	82	180	2.99977	3.01164	68.0081	67.9509	0.656755	0.678347	0	0	0	90	0	-10.7023	0	0	0	0	0.375
1949	82	240	2.85458	2.8695	72.1907	72.1143	0.452112	0.466975	0	0	0	90	0	-10.6268	0	0	0	0	0.375
1950	82	300	2.70845	2.72736	76.3803	76.2777	0.243547	0.251554	0	0	0	90	2.21298e-05	-10.5646	0	0	0	0	0.375
1951	82	360	2.57778	2.58522	80.3328	80.2903	0.239368	0.247237	0	0	0	90	13.2901	-10.558	0	0	0	0	0.375
1952	82	420	3.40596	3.30801	79.7363	80.2903	0.533145	0.550673	0	0	0	76.686	154.784	-9.67213	0	0	0	0	0.375
1953	82	480	5.62547	5.37959	69.1965	70.3887	0.826922	0.854108	0	0	0	63.2465	329.038	-7.69797	0	0	0	0	0.375
1954	82	540	8.74848	8.38615	58.8803	60.3442	1.1207	1.15754	0	0	0	50.2859	489.982	-4.68213	0	0	0	0	0.375
1955	82	600	12.1621	11.7298	48.8852	50.2997	1.41448	1.46098	0	0	0	38.3872	611.125	-1.388	0	0	0	0	0.375
1956	82	660	15.1989	14.7457	29.3415	30.2107	1.70825	1.76441	0	0	0	28.9664	686.755	0.0666546	0	0	0	0	0.375
1957	82	720	17.2568	16.834	29.4119	30.2107	2.29581	2.37129	0	0	0	25.0462	713.955	2.58934	0	0	0	0	0.375
1958	82	780	17.9989	17.5795	31.4549	32.2974	2.29581	2.37129	0	0	0	28.9664	686.481	3.78474	0	0	0	0	0.375
1959	82	840	17.2418	16.834	33.5066	34.384	2.20252	2.27493	0	0	0	38.3872	612.996	3.15627	0	0	0	0	0.375
1960	82	900	15.1201	14.7457	35.6012	36.4707	2.10924	2.17858	0	0	0	50.2859	492.236	0.879828	0	0	0	0	0.375
1961	82	960	12.0377	11.7298	37.7816	38.5573	2.01595	2.08223	0	0	0	63.2465	331.06	-2.53741	0	0	0	0	0.375
1962	82	1020	8.59703	8.38614	40.0668	40.644	1.92267	1.98588	0	0	0	76.686	155.976	-6.36278	0	0	0	0	0.375
1963	82	1080	6.25885	6.15778	42.4333	42.7306	1.82938	1.88953	0	0	0	90	13.3867	-8.84896	0	0	0	0	0.375
1964	82	1140	5.41376	5.37274	44.6896	44.8173	1.7361	1.79318	0	0	0	90	2.23107e-05	-9.60163	0	0	0	0	0.375
1965	82	1200	4.77798	4.75606	46.8321	46.9039	1.64282	1.69683	0	0	0	90	0	-10.1604	0	0	0	0	0.375
1966	82	1260	4.28624	4.27164	48.9404	48.9906	1.54953	1.60047	0	0	0	90	0	-10.5678	0	0	0	0	0.375
1967	82	1320	3.89507	3.8911	51.063	51.0772	1.45625	1.50412	0	0	0	90	0	-10.8572	0	0	0	0	0.375
1968	82	1380	3.59553	3.59217	53.1513	53.1639	1.36296	1.40777	0	0	0	90	0	-11.0548	0	0	0	0	0.375
1969	83	0	3.35201	3.35735	55.2714	55.2505	1.26968	1.31142	0	0	0	90	0	-11.1809	0	0	0	0	0.375
1970	83	60	3.20753	3.2145	59.4371	59.4078	1.06548	1.10051	0	0	0	90	0	-11.0544	0	0	0	0	0.375
1971	83	120	3.06202	3.07166	63.6084	63.565	0.86129	0.889606	0	0	0	90	0	-10.9469	0	0	0	0	0.375
1972	83	180	2.9164	2.92881	67.7819	67.7222	0.657096	0.678699	0	0	0	90	0	-10.8562	0	0	0	0	0.375
1973	83	240	2.77039	2.78596	71.959	71.8795	0.452902	0.467792	0	0	0	90	0	-10.7804	0	0	0	0	0.375
1974	83	300	2.62342	2.64312	76.1433	76.0367	0.243356	0.251357	0	0	0	90	1.88803e-05	-10.7179	0	0	0	0	0.375
1975	83	360	2.49016	2.50027	80.1234	80.0657	0.237088	0.244882	0	0	0	90	11.3747	-10.7089	0	0	0	0	0.375
1976	83	420	3.31086	3.21598	79.5301	80.0657	0.530933	0.548388	0	0	0	76.854	152.809	-9.83084	0	0	0	0	0.375
1977	83	480	5.53431	5.29098	69.0464	70.2244	0.824778	0.851894	0	0	0	63.431	327.144	-7.8507	0	0	0	0	0.375
1978	83	540	8.66944	8.30911	58.7161	60.1687	1.11862	1.1554	0	0	0	50.5016	488.251	-4.8227	0	0	0	0	0.375
1979	83	600	12.0997	11.669	48.7083	50.1129	1.41247	1.45891	0	0	0	38.6557	609.525	-1.51202	0	0	0	0	0.375
1980	83	660	15.1528	14.7012	29.1408	30.0014	1.70631	1.76241	0	0	0	29.3111	685.225	-0.0567667	0	0	0	0	0.375
1981	83	720	17.223	16.8014	29.2102	30.0014	2.294	2.36942	0	0	0	25.4403	712.458	2.48188	0	0	0	0	0.375
1982	83	780	17.9692	17.5513	31.2533	32.0874	2.294	2.36942	0	0	0	29.3111	684.953	3.68607	0	0	0	0	0.375
1983	83	840	17.2079	16.8014	33.304	34.1734	2.20079	2.27315	0	0	0	38.6557	611.383	3.05436	0	0	0	0	0.375
1984	83	900	15.0743	14.7012	35.3977	36.2594	2.10758	2.17687	0	0	0	50.5016	490.487	0.764145	0	0	0	0	0.375
1985	83	960	11.9754	11.669	37.5772	38.3455	2.01437	2.0806	0	0	0	63.431	329.145	-2.67314	0	0	0	0	0.375
1986	83	1020	8.51837	8.30911	39.8613	40.4315	1.92116	1.98432	0	0	0	76.854	153.98	-6.51888	0	0	0	0	0.375
1987	83	1080	6.18523	6.08607	42.2271	42.5175	1.82795	1.88804	0	0	0	90	11.4569	-8.99866	0	0	0	0	0.375
1988	83	1140	5.33817	5.29821	44.4797	44.6035	1.73474	1.79177	0	0	0	90	1.90323e-05	-9.75382	0	0	0	0	0.375
1989	83	1200	4.70046	4.67914	46.6199	46.6895	1.64153	1.69549	0	0	0	90	0	-10.3146	0	0	0	0	0.375
1990	83	1260	4.20662	4.1927	48.7279	48.7755	1.54831	1.59922	0	0	0	90	0	-10.7235	0	0	0	0	0.375
1991	83	1320	3.81413	3.81048	50.8484	50.8615	1.4551	1.50294	0	0	0	90	0	-11.014	0	0	0	0	0.375
1992	83	1380	3.51284	3.51014	52.9374	52.9475	1.36189	1.40667	0	0	0	90	0	-11.2123	0	0	0	0	0.375
1993	84	0	3.26854	3.27415	55.0554	55.0336	1.26868	1.31039	0	0	0	90	0	-11.339	0	0	0	0	0.375
1994	84	60	3.12313	3.13057	59.2159	59.1846	1.06493	1.09995	0	0	0	90	0	-11.2117	0	0	0	0	0.375
1995	84	120	2.97683	2.987	63.3814	63.3357	0.861187	0.8895	0	0	0	90	0	-11.1037	0	0	0	0	0.375
1996	84	180	2.83044	2.84343	67.549	67.4868	0.657441	0.679055	0	0	0	90	0	-11.0126	0	0	0	0	0.375
1997	84	240	2.68363	2.69985	71.7205	71.6379	0.453695	0.468611	0	0	0	90	0	-10.9365	0	0	0	0	0.375
1998	84	300	2.53581	2.55628	75.8994	75.7889	0.243166	0.251161	0	0	0	90	1.61189e-05	-10.8738	0	0	0	0	0.375
[truncated: 27,571 more rows]
