# Supplementary material for: The micro-niche explains allotopy and syntopy in South American Liolaemus (Iguania: Liolaemidae) lizards
Source: PeerJ journal article supplement (doi:10.7717/peerj.18979), 2025-02-17

## Supplementary Figure 1

### Monthly variation of the variables studied

A.- Monthly variation of Air Temperature of the four sites studied. Dots refers to mean and lines to standard deviation. B.- Monthly variation of Relative Humidity of the four sites studied. Dots refer to mean and lines to standard deviation. C.- Monthly variation of Wind Speed of the four sites studied. Dots represent the mean, and lines represent the standard deviation. D.- Monthly variation of Sun Radiation of the four sites studied. Dots refers to mean and lines to standard deviation.

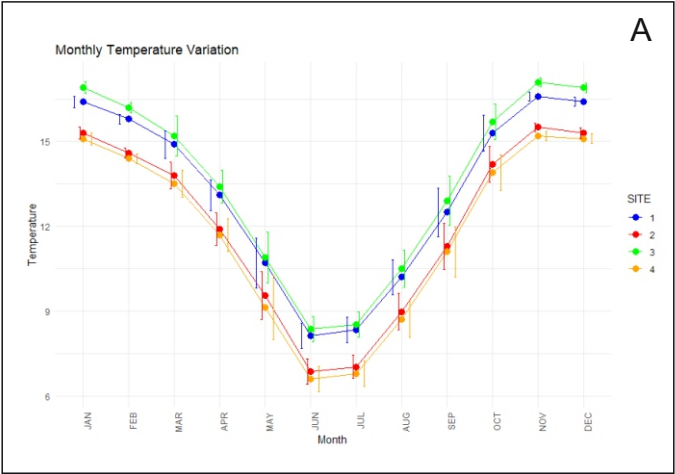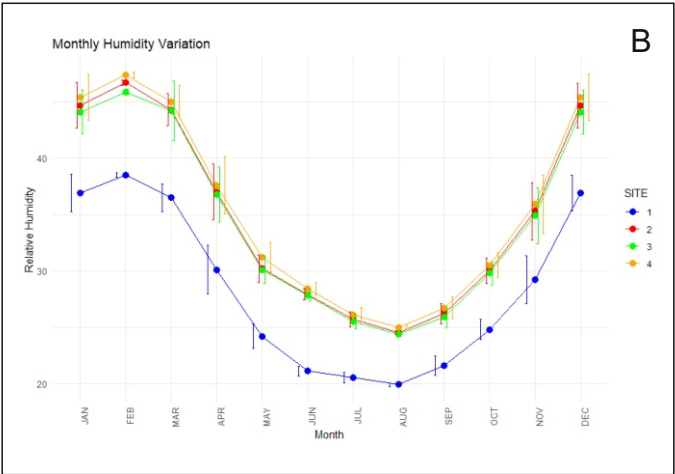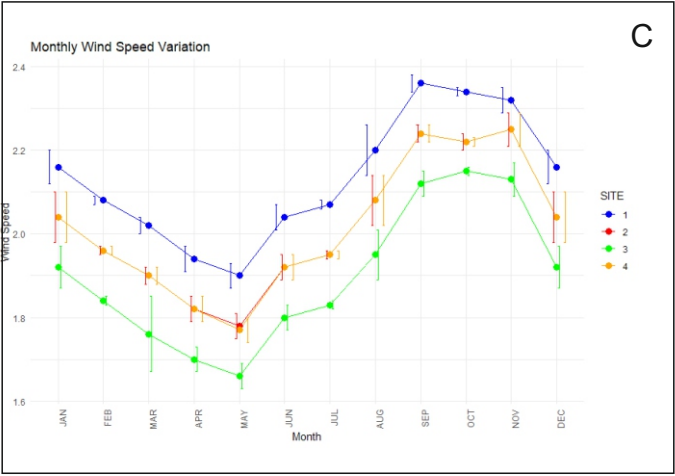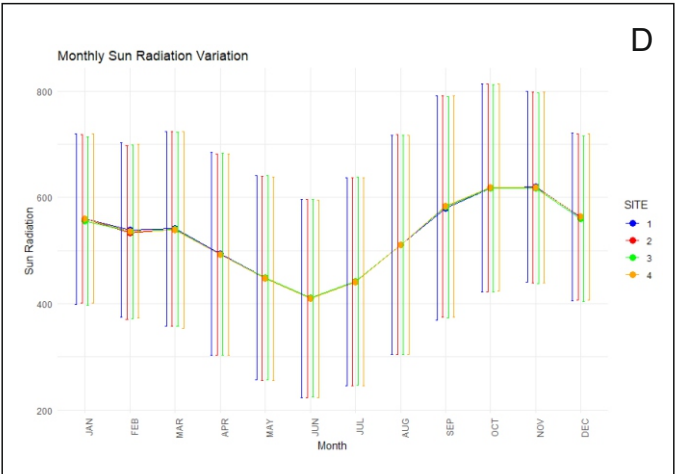

Supplement: Supplementary_Figure_1.pdf [file Supplementary_Figure_1.pdf]
